# Supplementary material for: Does electrophilic activation of nitroalkanes in polyphosphoric acid involve formation of nitrile oxides?
Source: Royal Society of Chemistry journal article supplement (doi:10.1039/d1ra06503c), 2021-01-01
Supplement: d1ra06503c1.pdf [file d1ra06503c1.pdf]

Electronic Supplementary Material (ESI) for RSC Advances.

This journal is © The Royal Society of Chemistry 2021

## Does electrophilic activation of nitroalkanes in polyphosphoric acid involves formation of nitrile oxides?

Alexander V. Aksenov,<sup>a\*</sup> Nicolai A. Aksenov,<sup>a</sup> Nikita K. Kirilov,<sup>a</sup> Anton A. Skomorokhov,<sup>a</sup> Dmitrii A. Aksenov,<sup>a</sup> Igor A. Kurenkov,<sup>a</sup> Elena A. Sorokina,<sup>b</sup> Mezvah A. Nobi,<sup>c</sup> Michael Rubin,<sup>\*a,c</sup>

*a.* Department of Chemistry, North Caucasus Federal University, 1a Pushkin St., Stavropol 355009, Russian Federation. E-mail: [naksenov@ncfu.ru](mailto:naksenov@ncfu.ru)

*b.* Organic Chemistry Department, Peoples' Friendship, University of Russia (RUDN University), 6, Miklukho-Maklaya St., Moscow, 117198, Russian Federation

*c.* Department of Chemistry, University of Kansas, 1567 Irving Hill Road, Lawrence, KS 66045-7582, USA. Tel: +1-785-864- 5071, E-mail: [mrubin@ku.edu](mailto:mrubin@ku.edu)

### Supporting Information

|                                                                                                                                                                             |     |
|-----------------------------------------------------------------------------------------------------------------------------------------------------------------------------|-----|
| NMR Spectral Charts.....                                                                                                                                                    | S2  |
| <sup>1</sup> H and <sup>13</sup> C NMR spectral charts for starting 2-nitro-4'-ethylacetophenone ( <b>1c</b> ).....                                                         | S2  |
| <sup>1</sup> H and <sup>13</sup> C NMR spectral charts for furoxans <b>8</b> .....                                                                                          | S4  |
| <sup>1</sup> H and <sup>13</sup> C NMR spectral charts for isoxazoles <b>10</b> .....                                                                                       | S22 |
| <sup>1</sup> H and <sup>13</sup> C NMR spectral charts for 4,7-diphenyl-[1,2,5]oxadiazolo[3,4- <i>d</i> ]pyridazine 1-oxide ( <b>13a</b> ):.....                            | S40 |
| <sup>1</sup> H and <sup>13</sup> C NMR spectral charts for cycloadducts with chalcones <b>12aa</b> , <b>14aa</b> , <b>15fb</b> : .....                                      | S42 |
| <sup>1</sup> H and <sup>13</sup> C NMR spectral charts for 3-Benzoyl-5-phenyl-3a,6a-dihydro-4H-pyrrolo[3,4- <i>d</i> ]isoxazole-4,6( <i>5H</i> )-dione ( <b>17a</b> ):..... | S48 |
| <sup>1</sup> H and <sup>13</sup> C NMR spectral charts for benzamides ( <b>18</b> ).....                                                                                    | S50 |
| <sup>1</sup> H and <sup>13</sup> C NMR spectral charts for starting 4-chlorobenzoic acid ( <b>19f</b> ).....                                                                | S60 |
| HRMS charts.....                                                                                                                                                            | S62 |
| HRMS spectral charts for starting 2-nitro-4'-ethylacetophenone ( <b>1c</b> ) .....                                                                                          | S62 |
| HRMS spectral charts for furoxans <b>8</b> .....                                                                                                                            | S63 |
| HRMS spectral charts for isoxazoles <b>10</b> .....                                                                                                                         | S67 |
| HRMS spectral charts for 4,7-diphenyl-[1,2,5]oxadiazolo[3,4- <i>d</i> ]pyridazine 1-oxide ( <b>13a</b> ):.....                                                              | S71 |
| HRMS spectral charts for cycloadducts with chalcones <b>12aa</b> , <b>14aa</b> , <b>15fb</b> :.....                                                                         | S72 |
| HRMS spectral charts for 3-benzoyl-5-phenyl-3a,6a-dihydro-4H-pyrrolo[3,4- <i>d</i> ]isoxazole-4,6( <i>5H</i> )-dione ( <b>17a</b> ):.....                                   | S73 |
| X-Ray crystallography data.....                                                                                                                                             | S74 |
| References.....                                                                                                                                                             | S81 |

**<sup>1</sup>H and <sup>13</sup>C NMR spectral charts for starting 2-nitro-4'-ethylacetophenone (1c)**

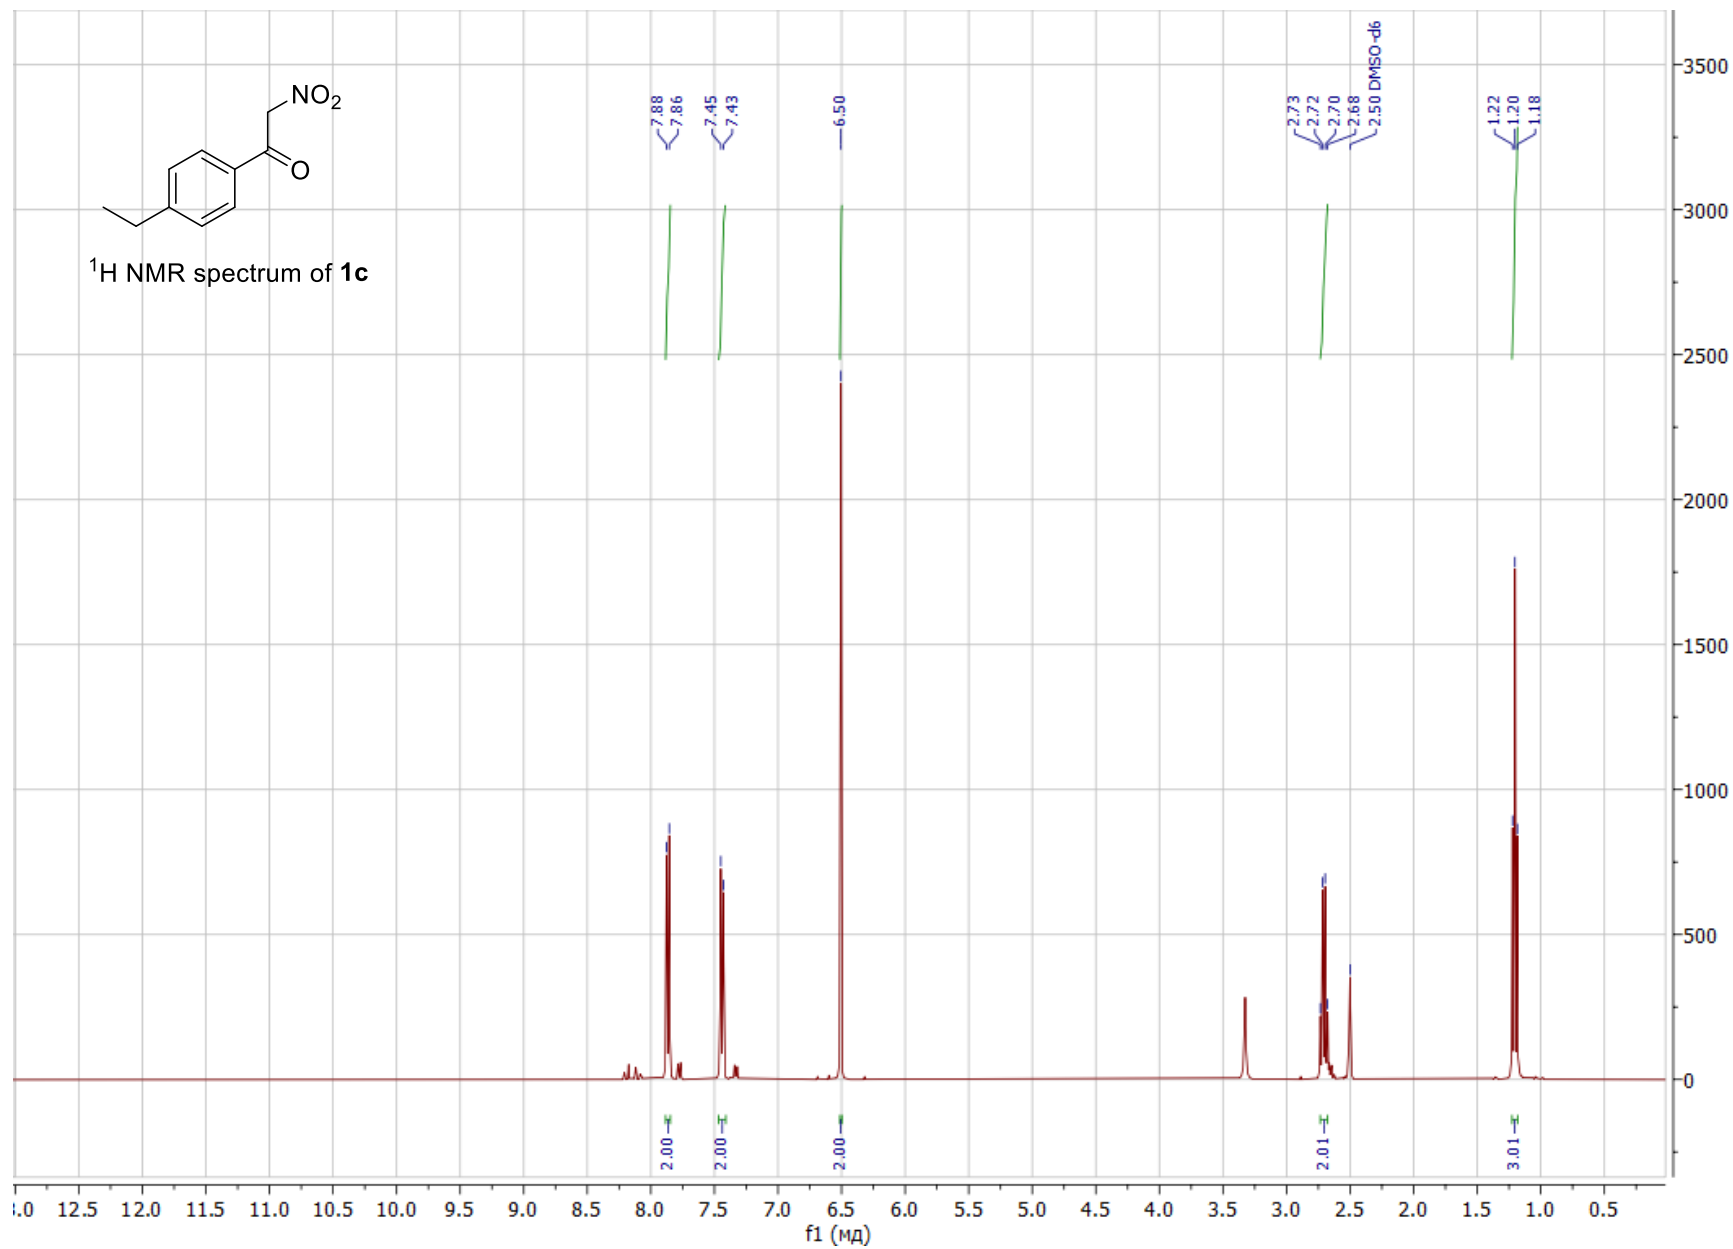

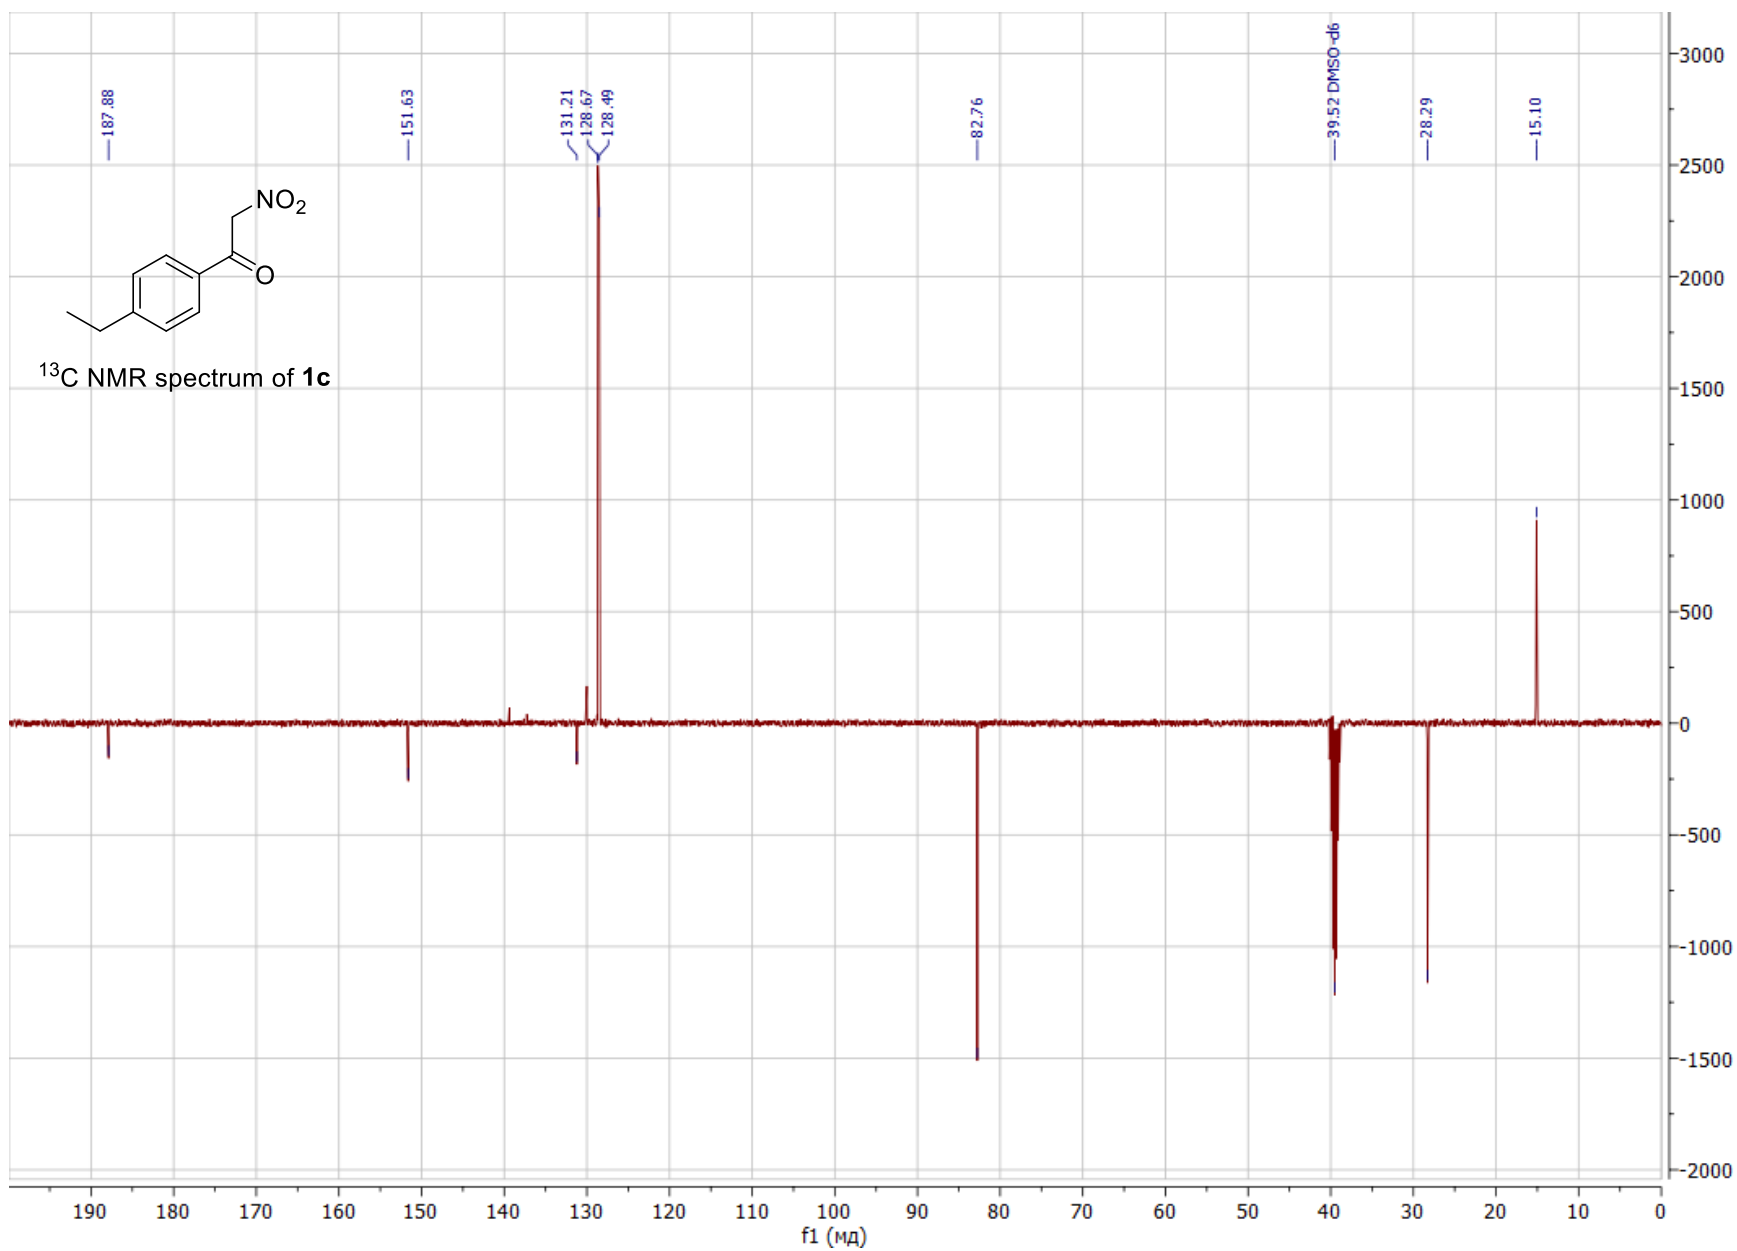

**<sup>1</sup>H and <sup>13</sup>C NMR spectral charts for furoxans 8**

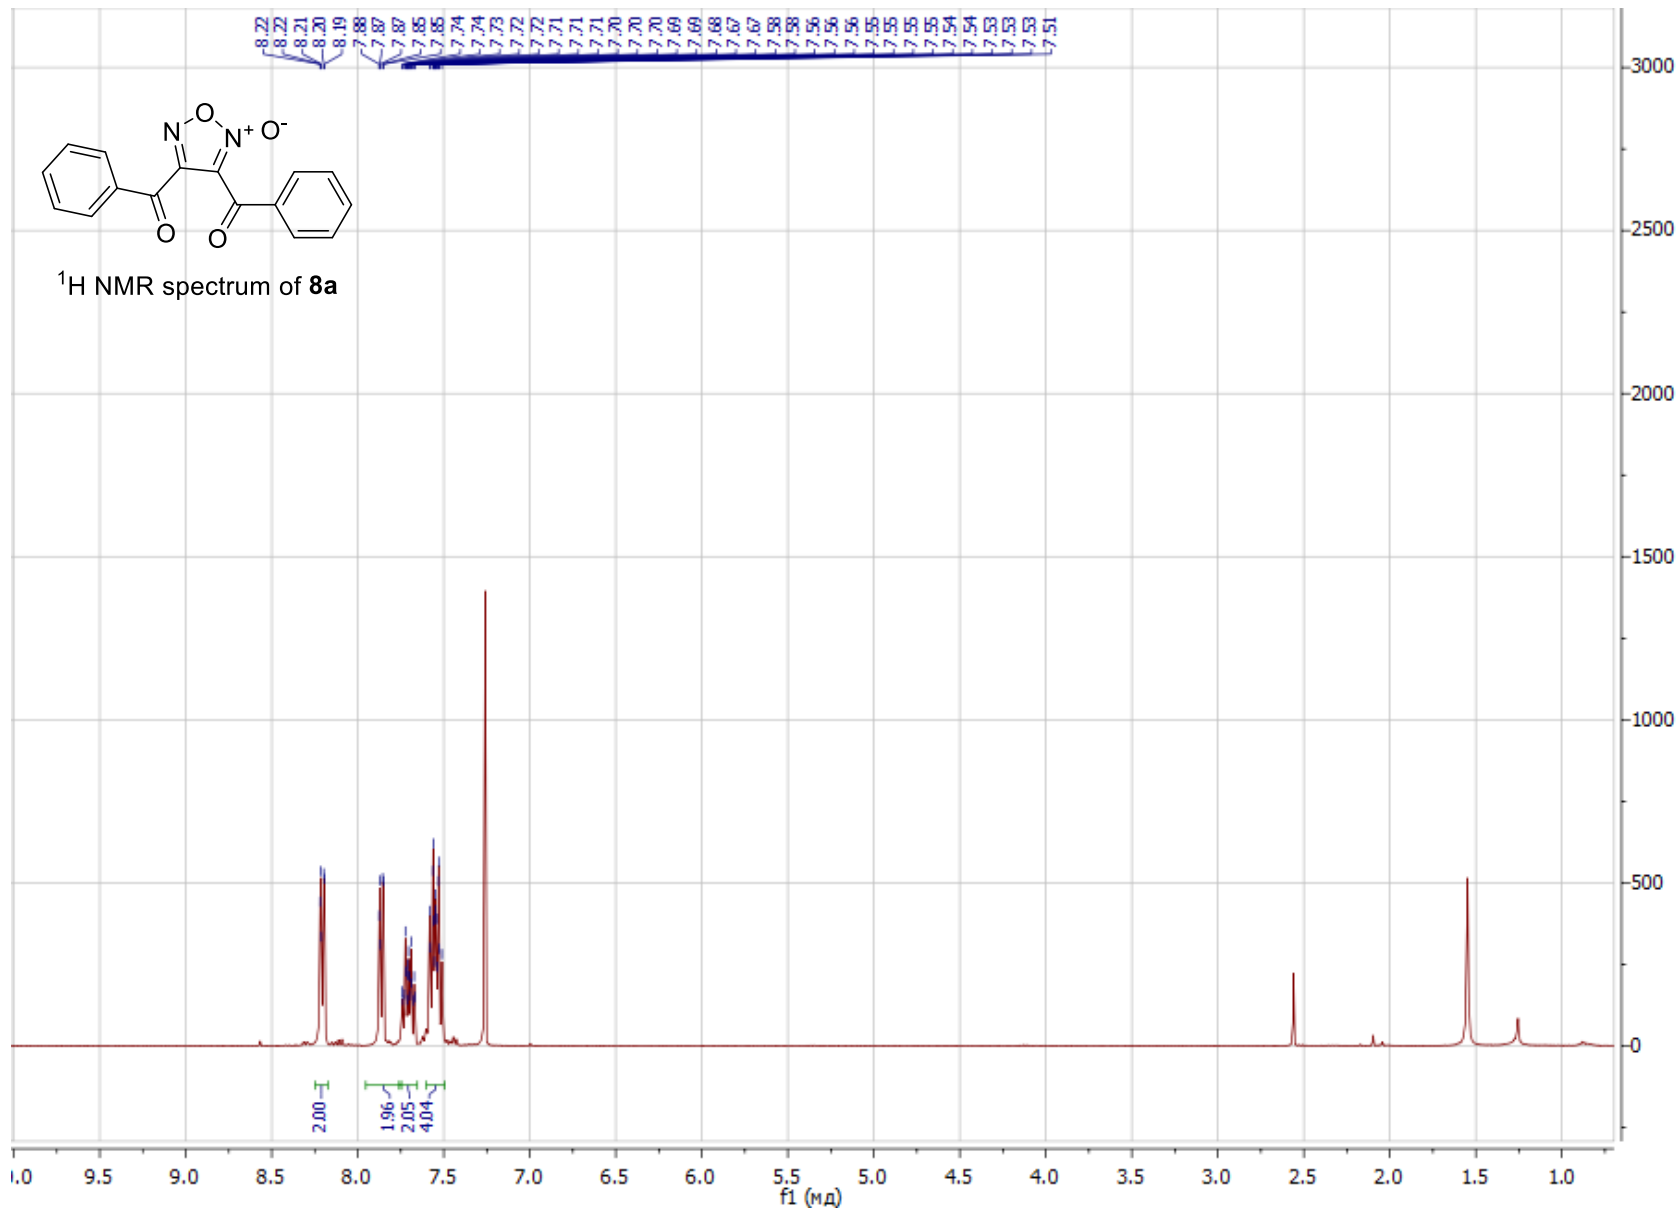

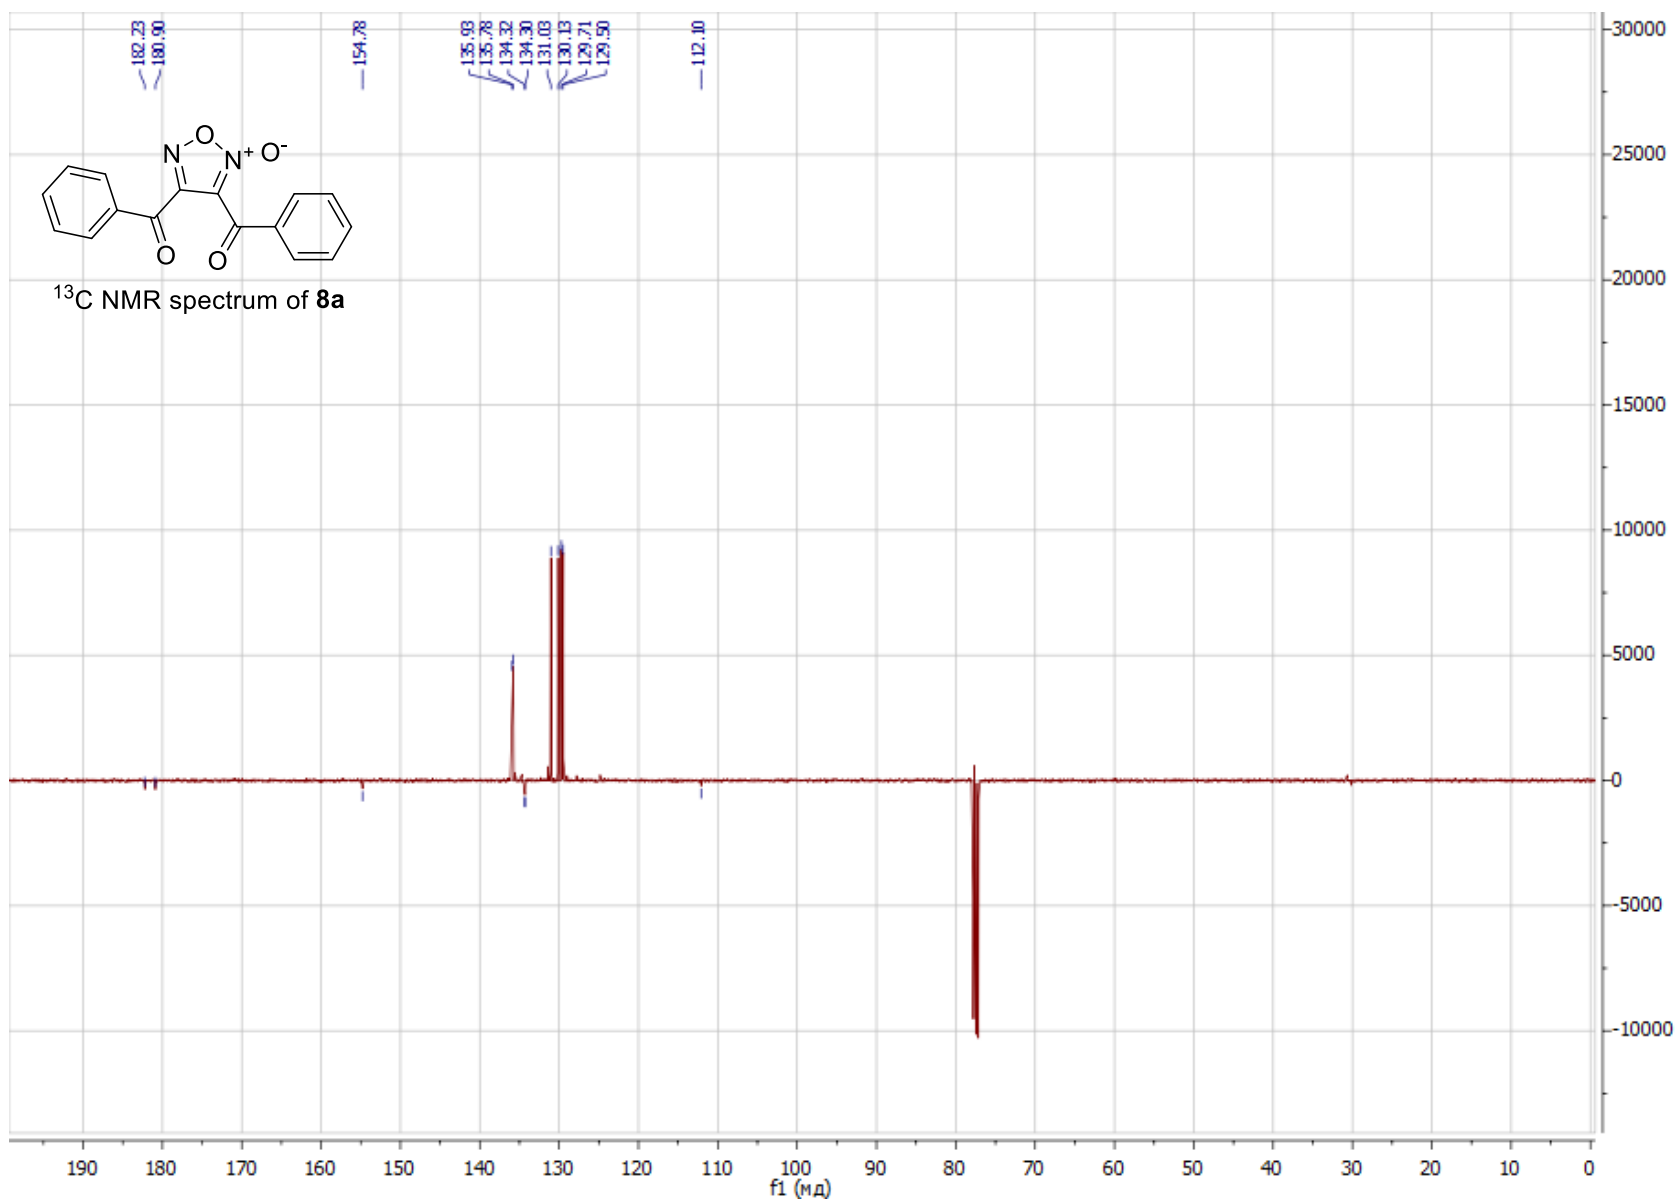

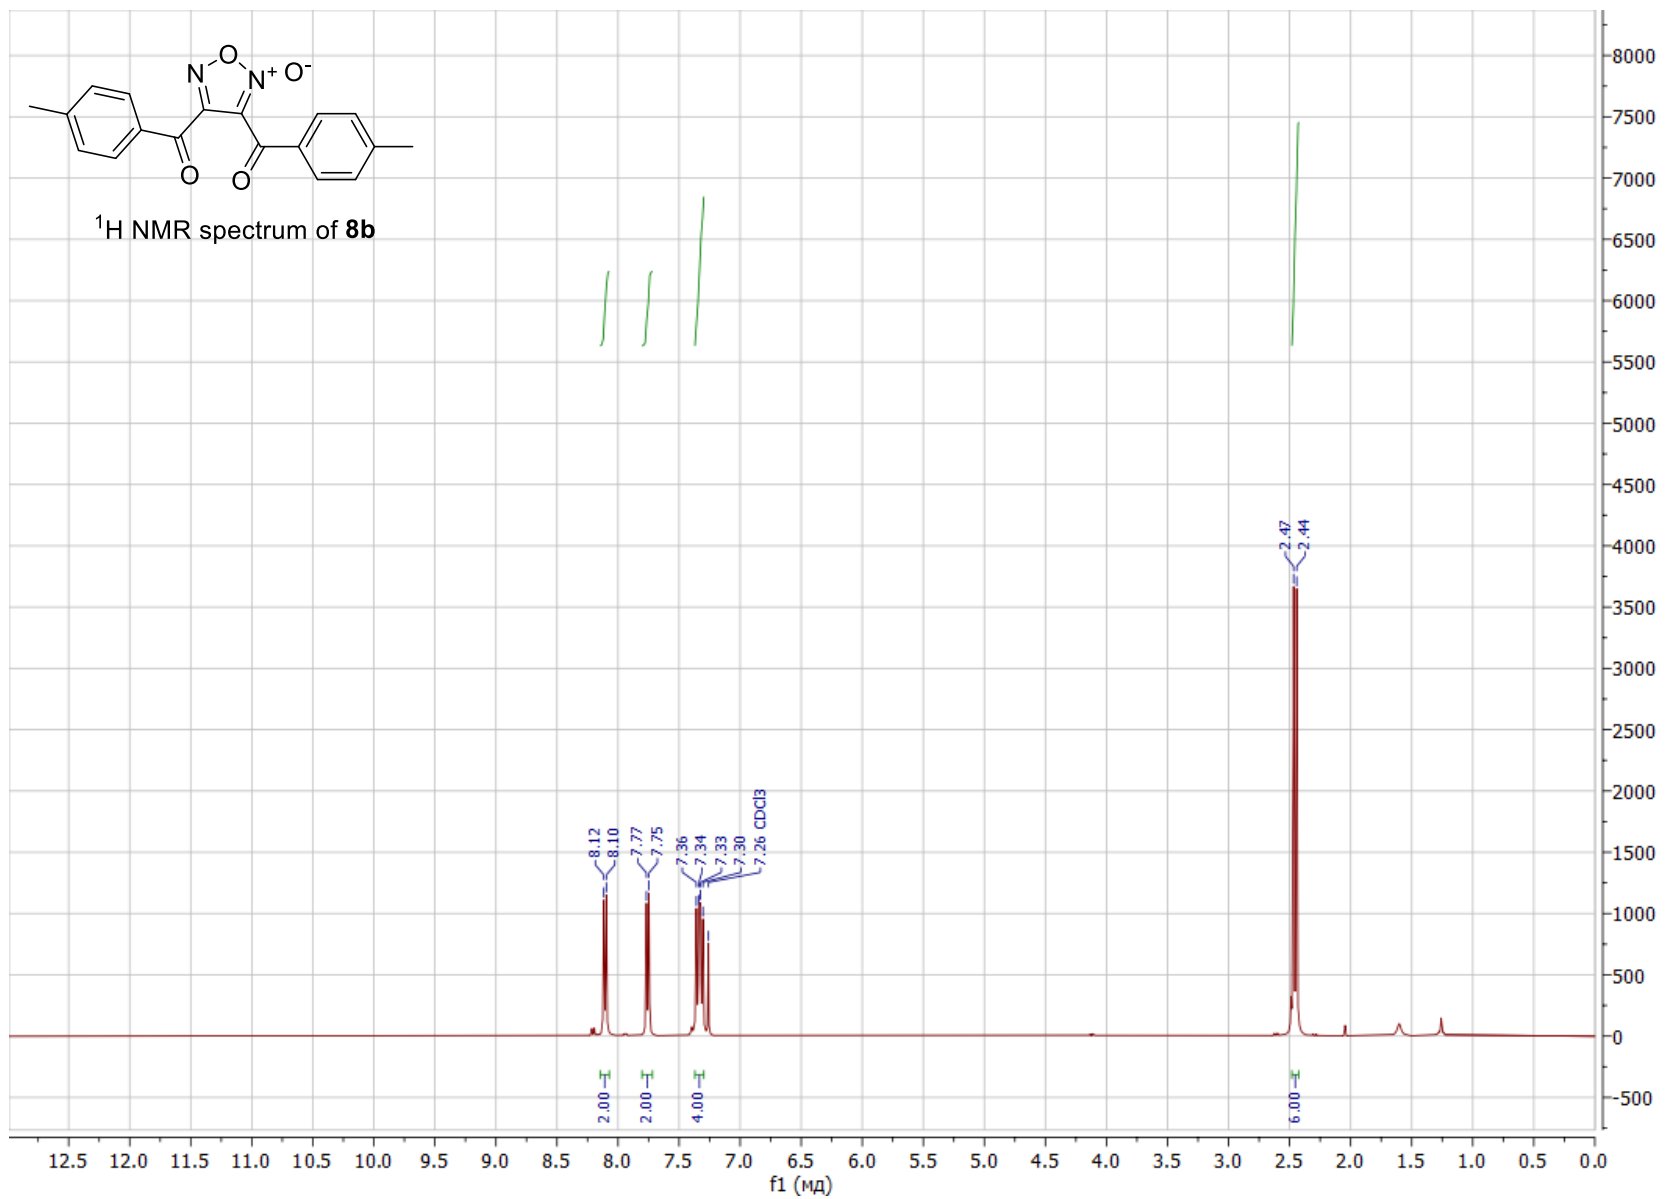

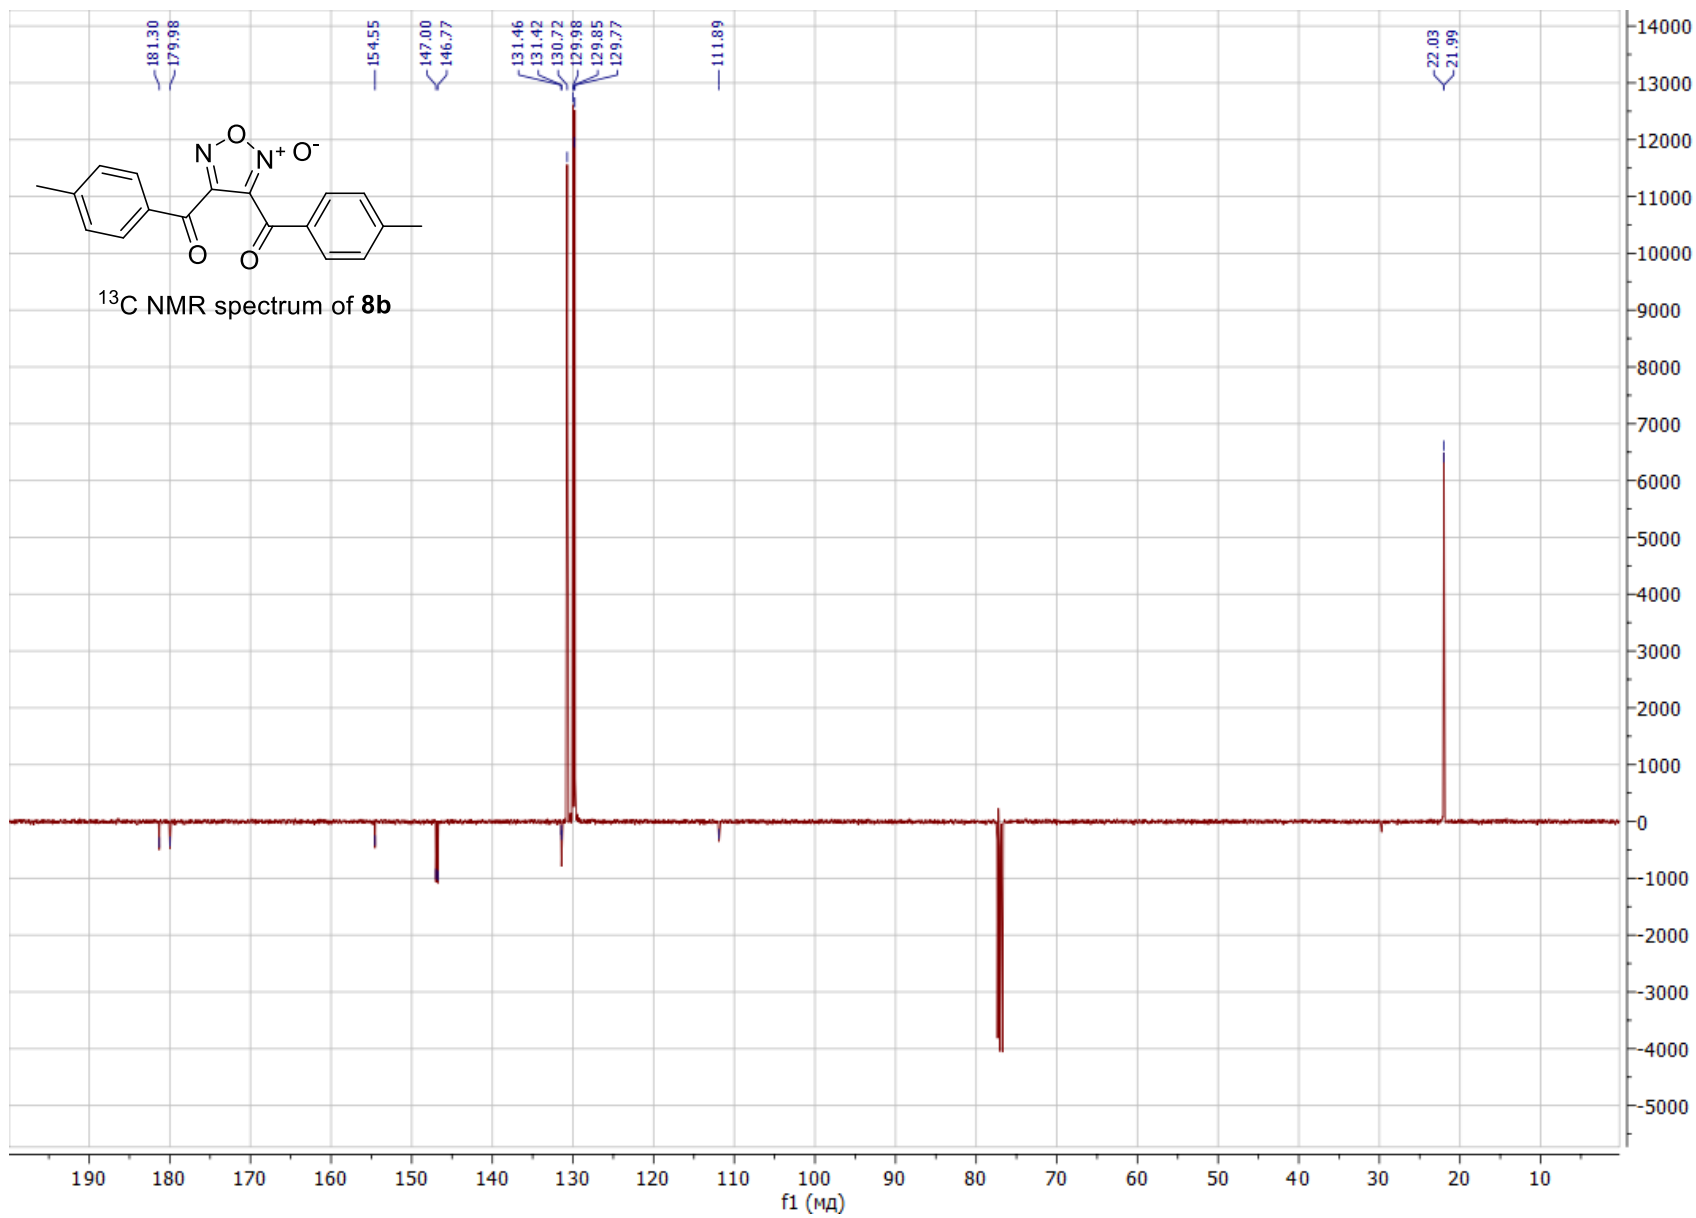

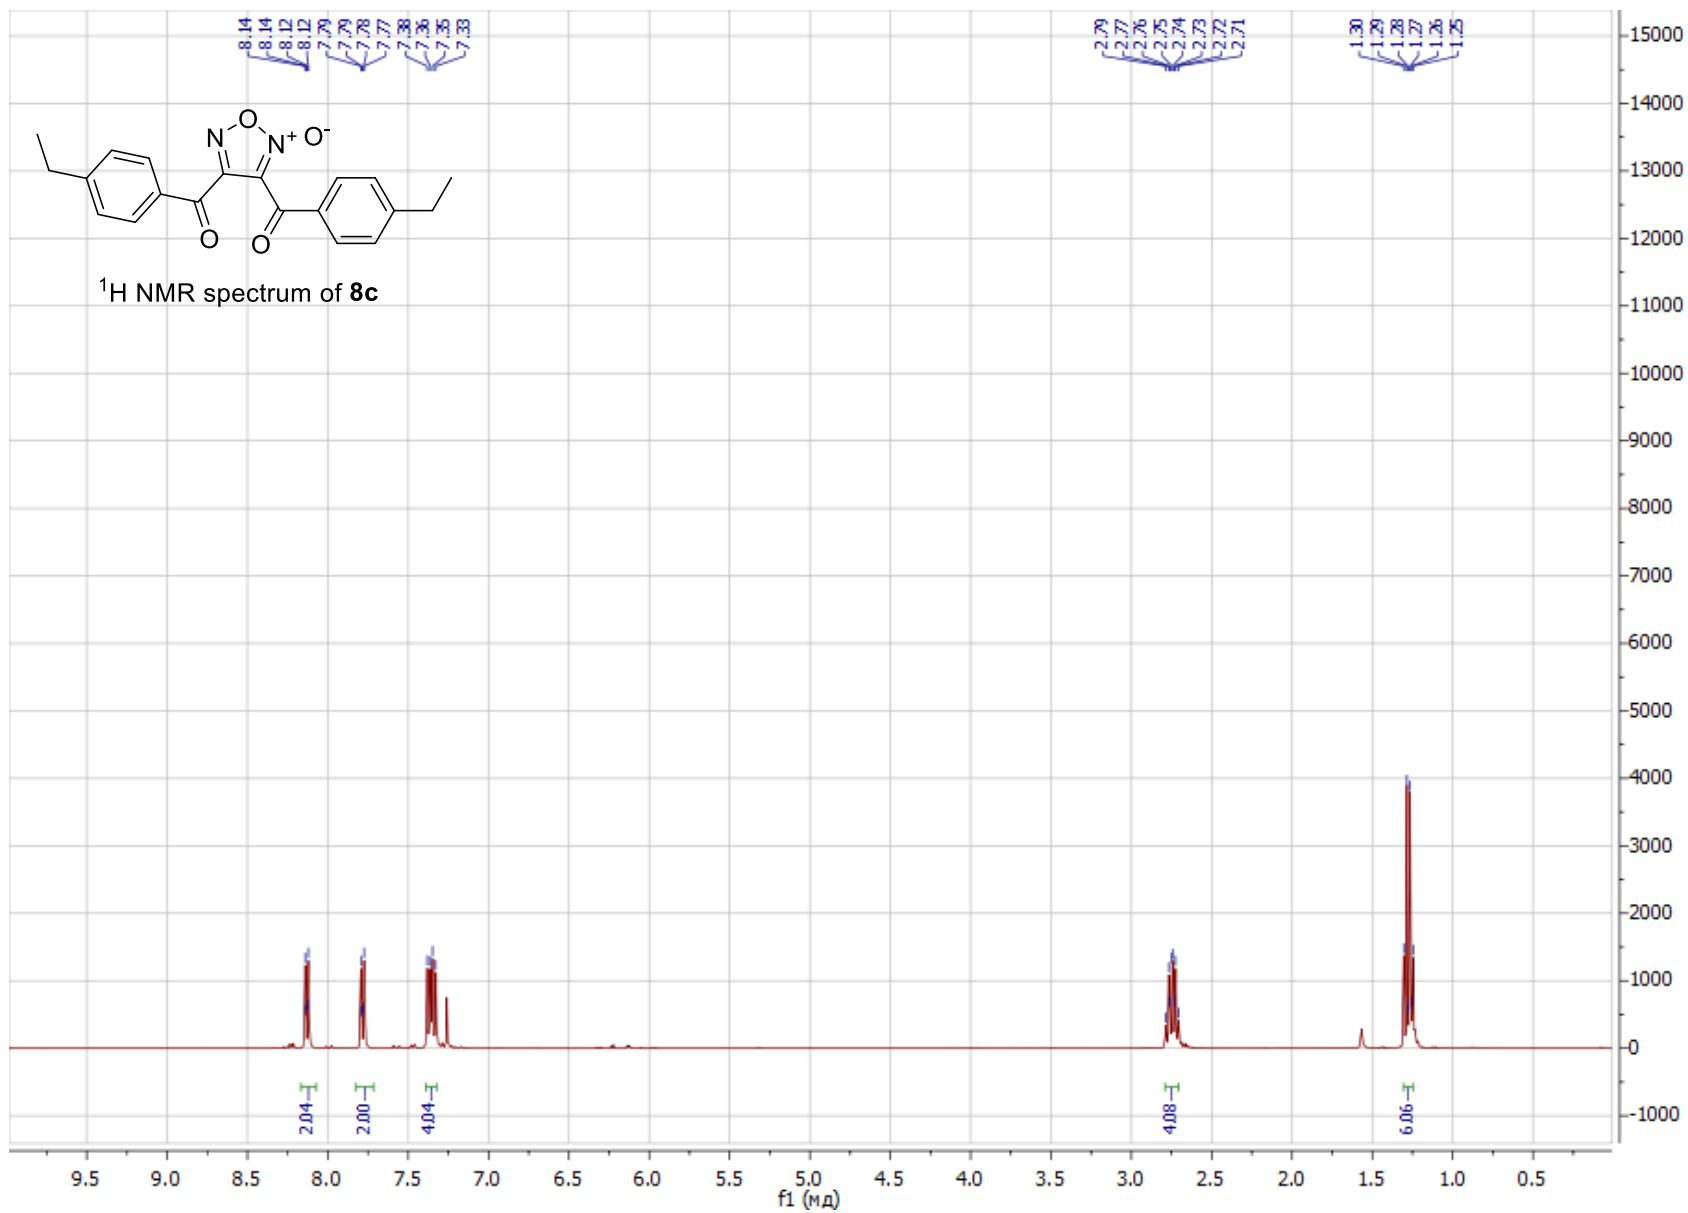



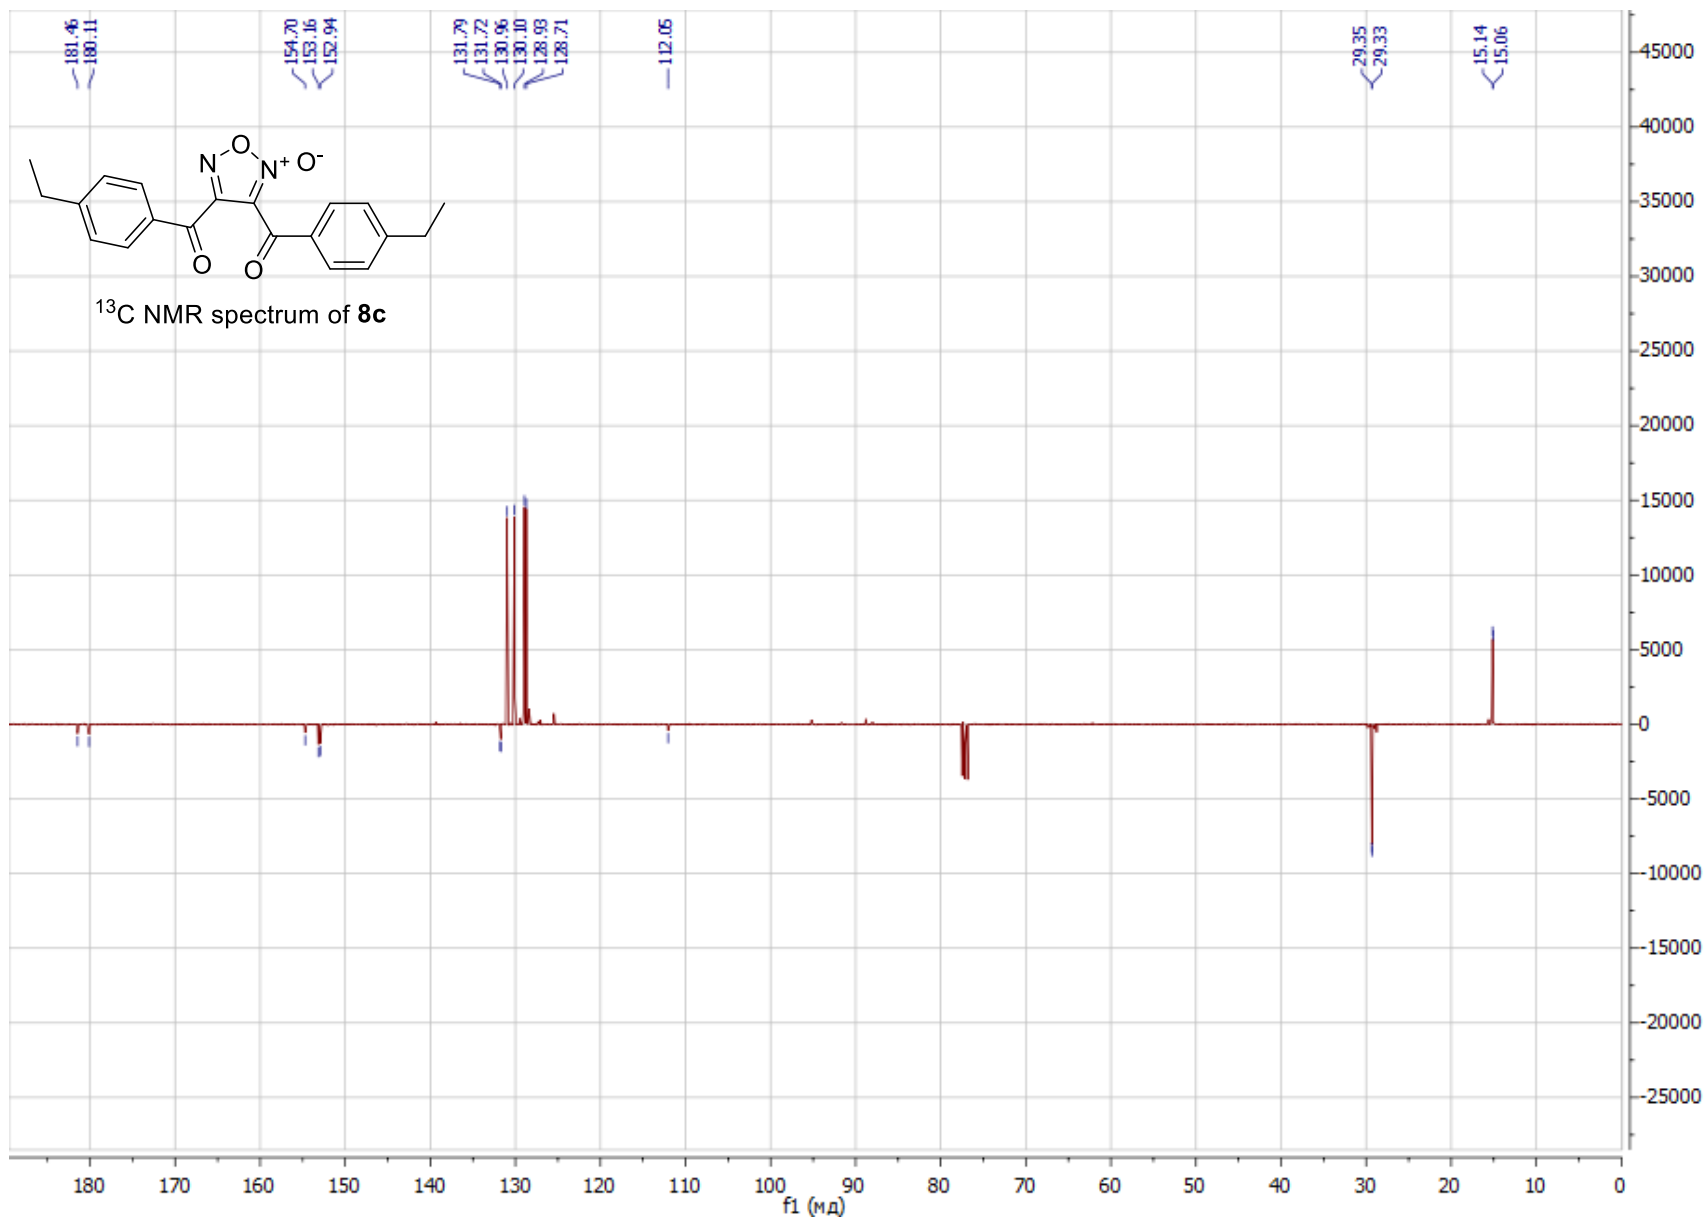

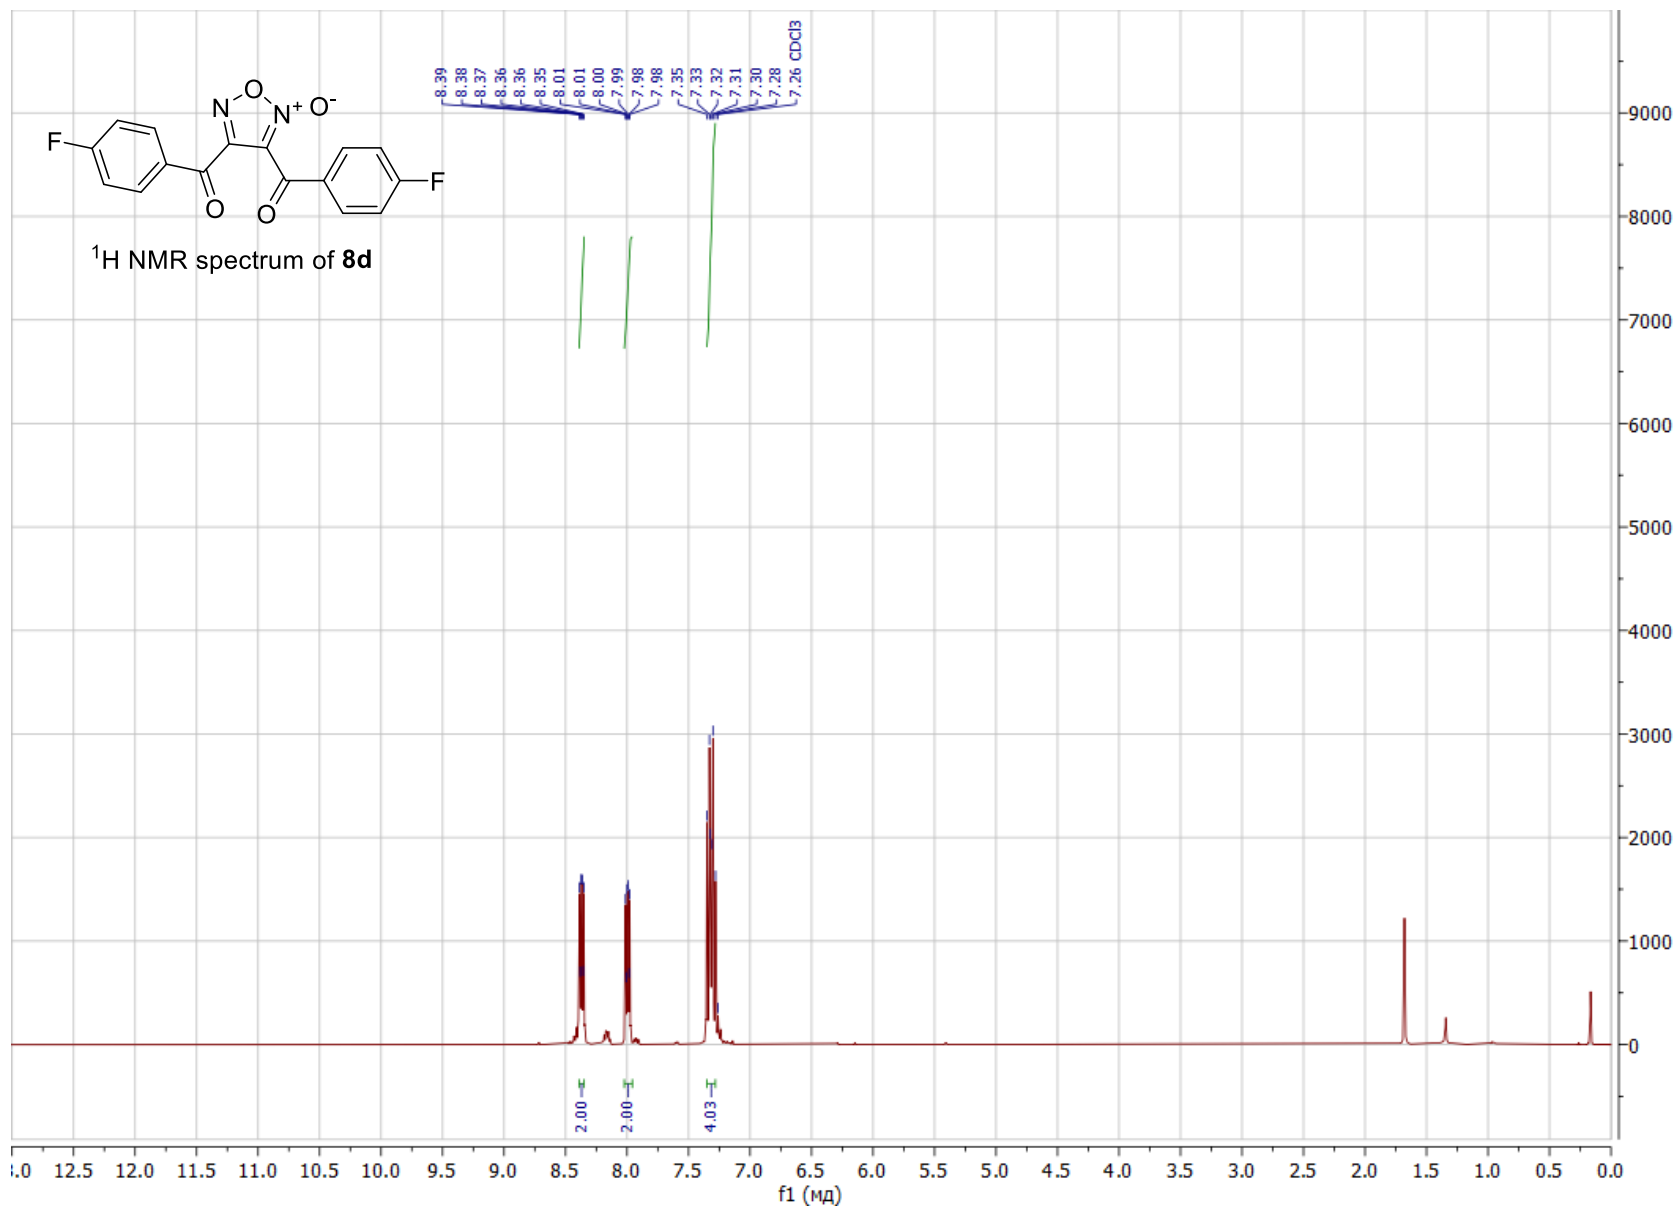

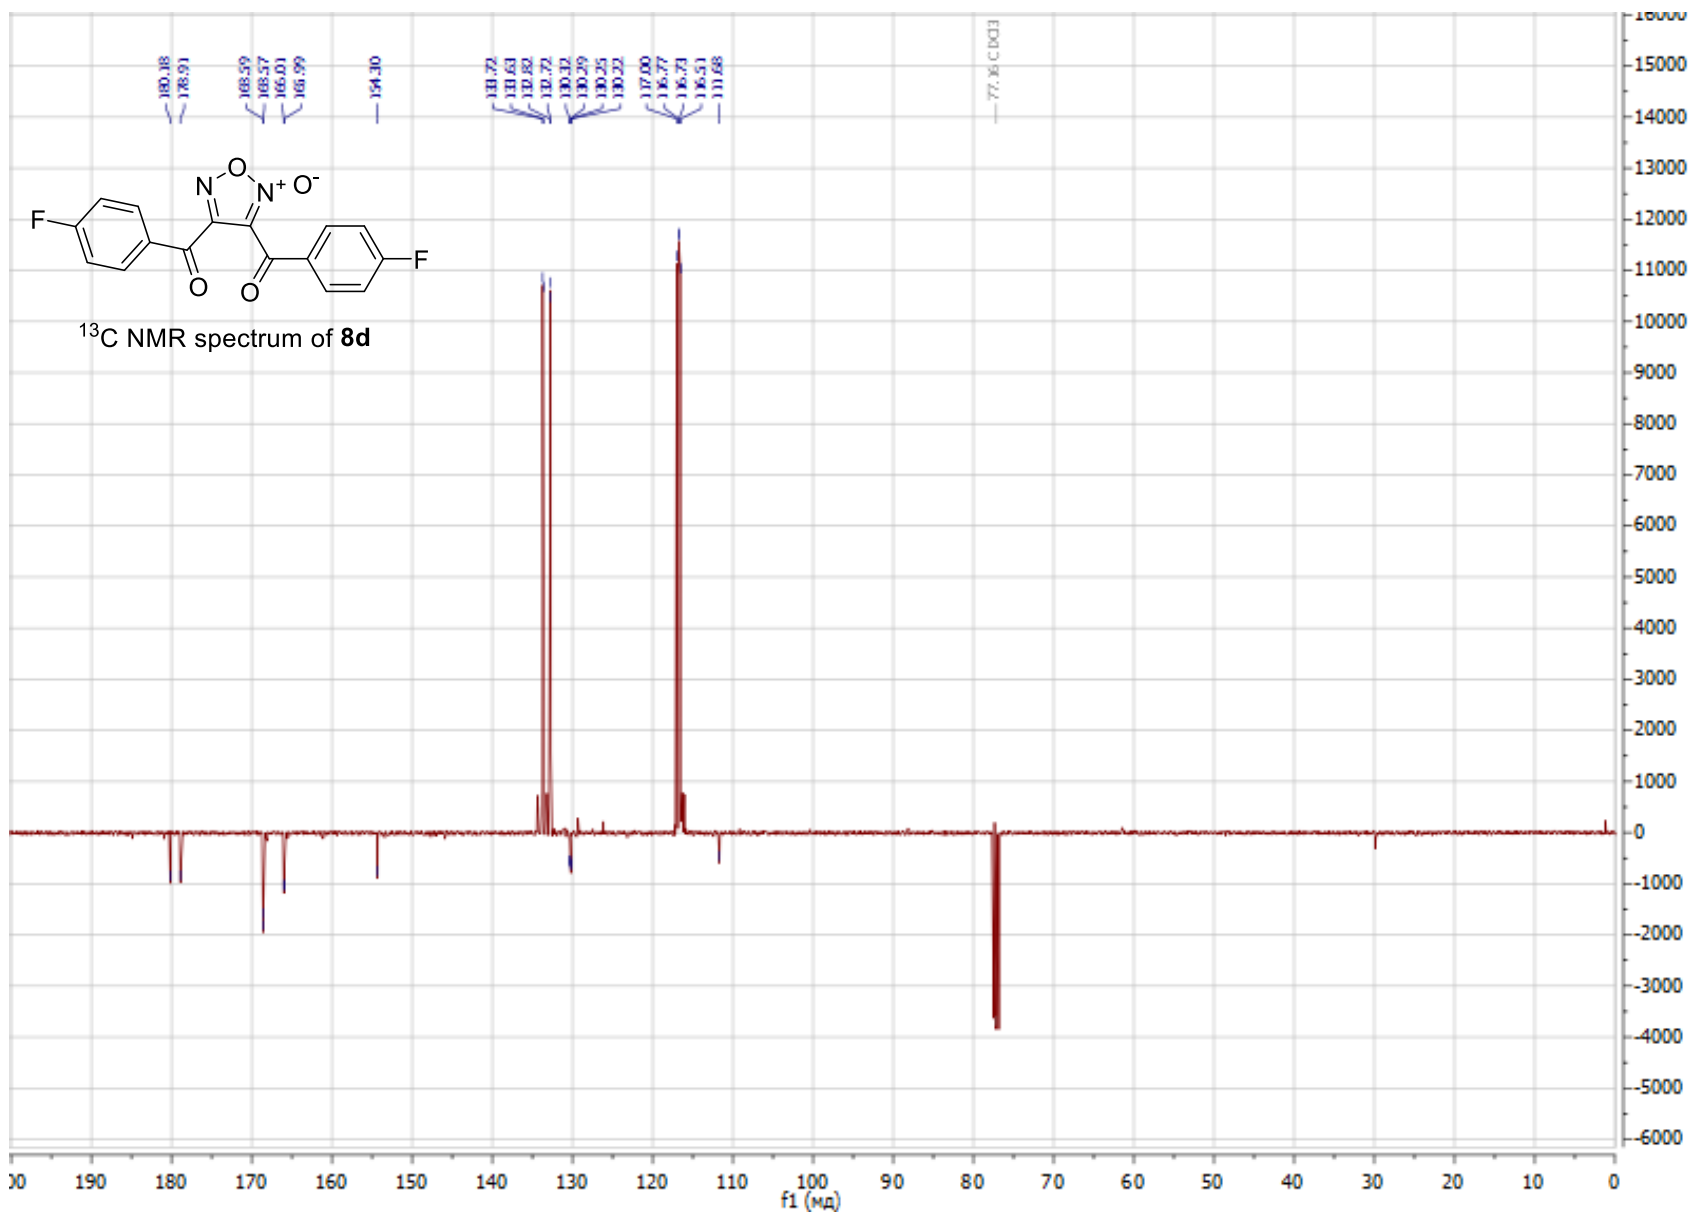

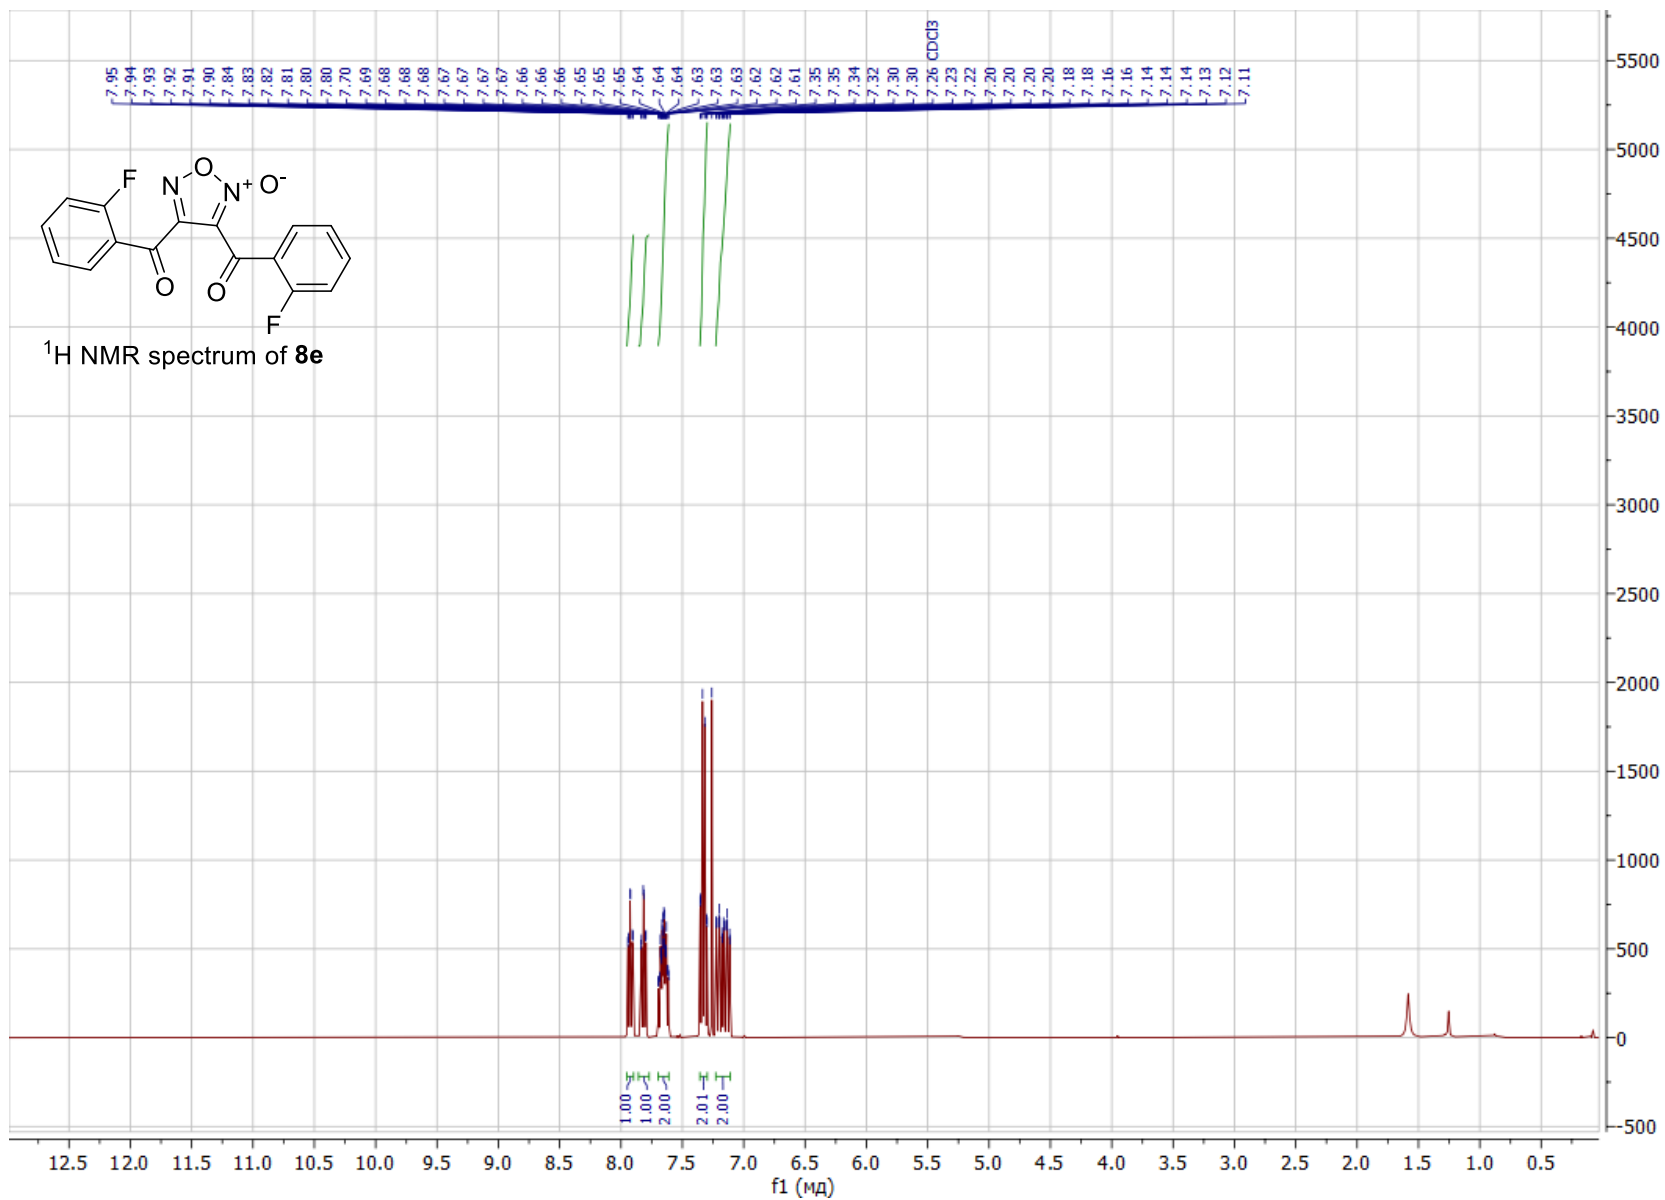

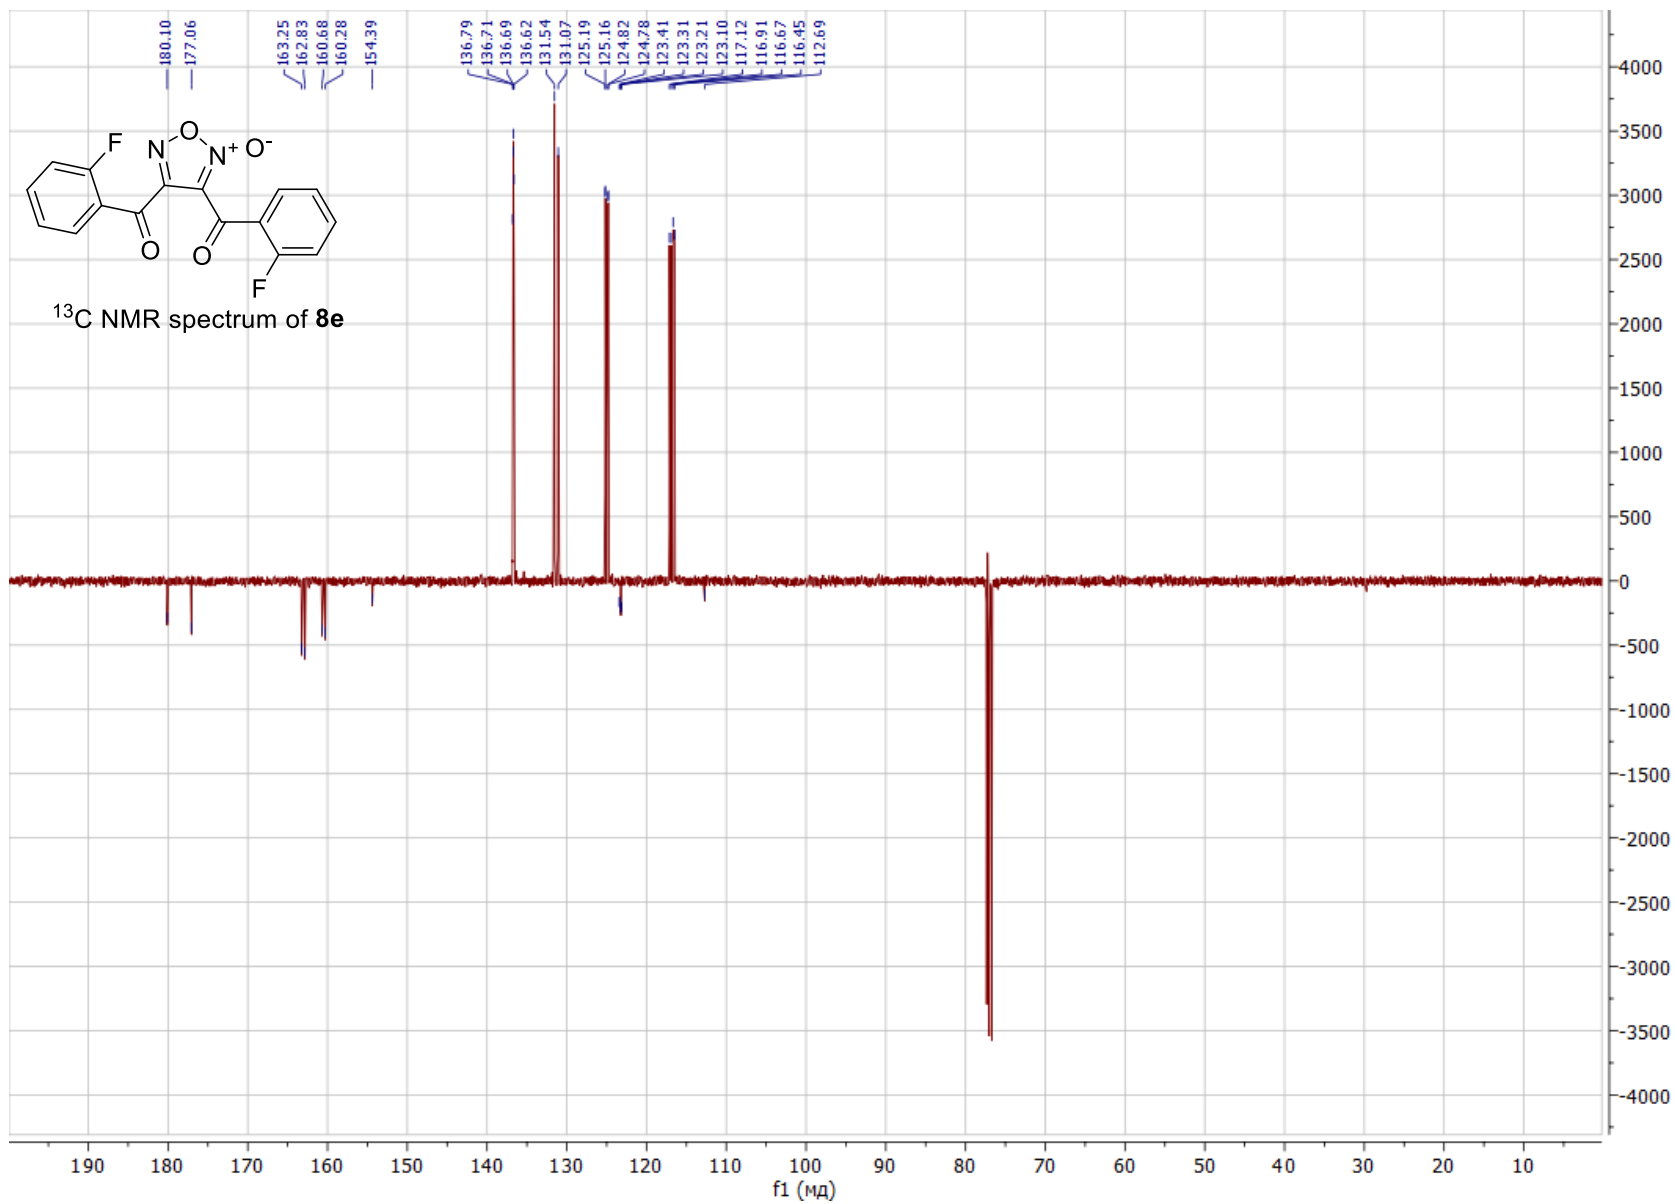

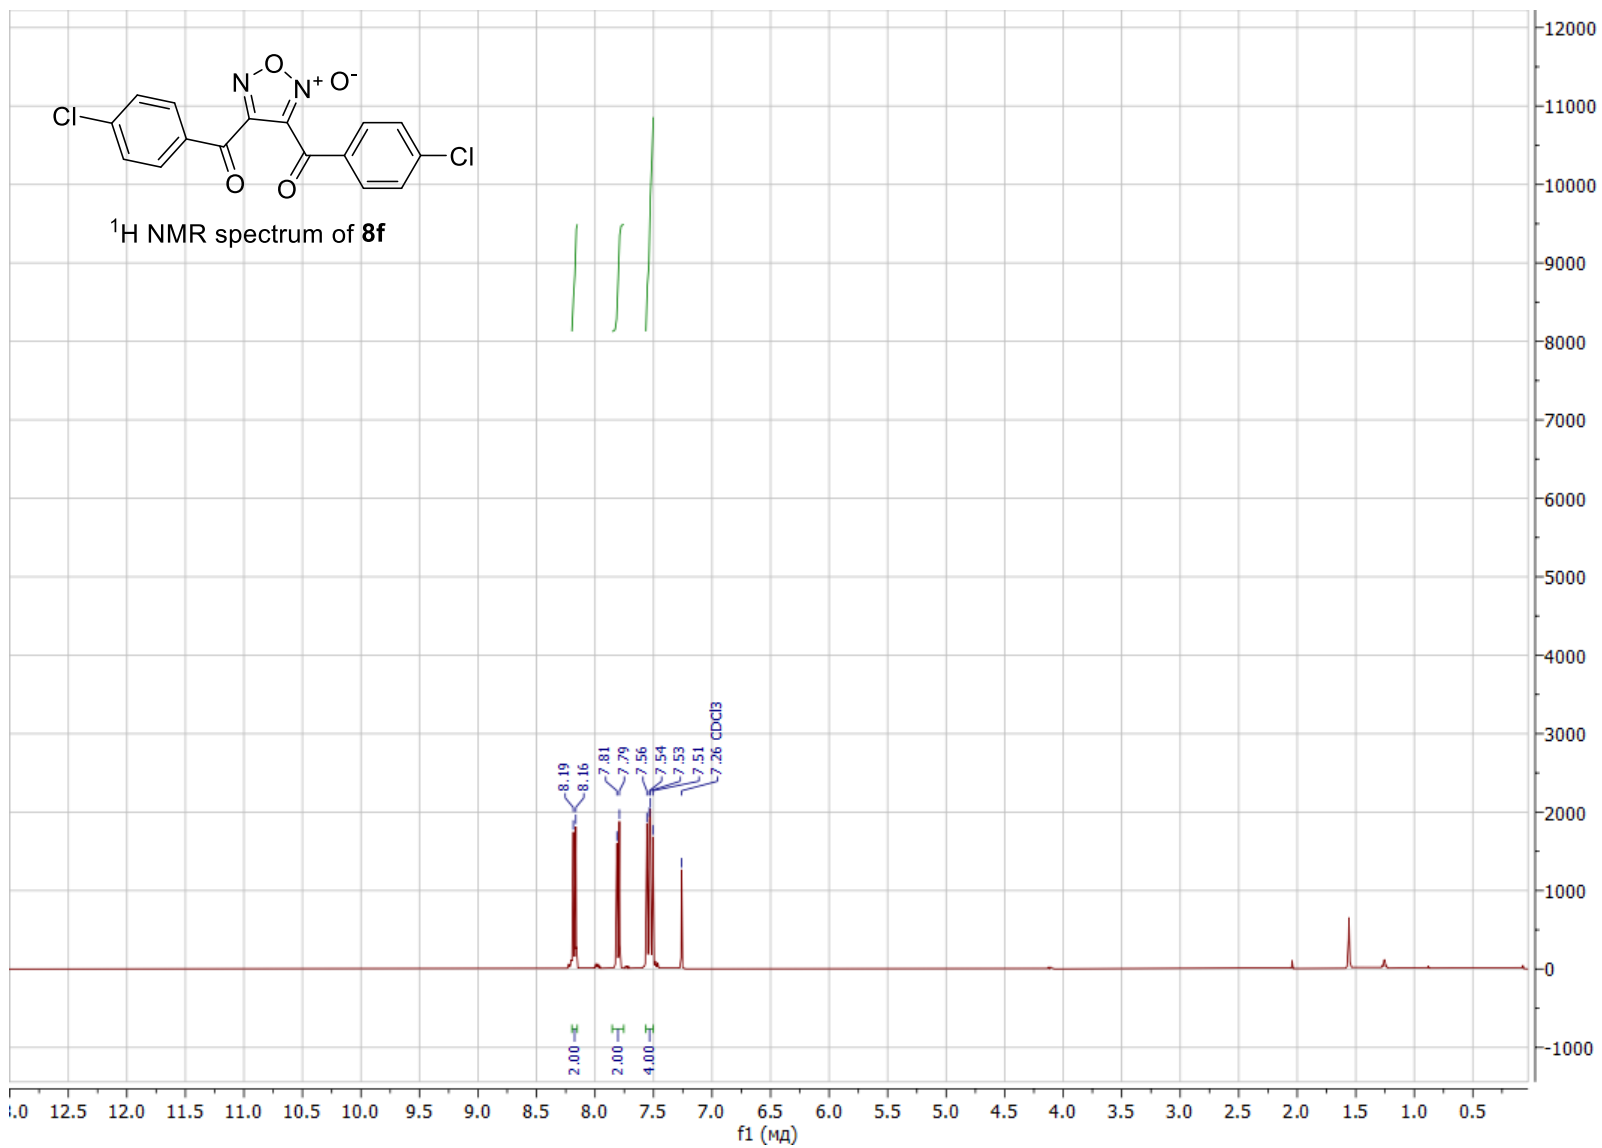

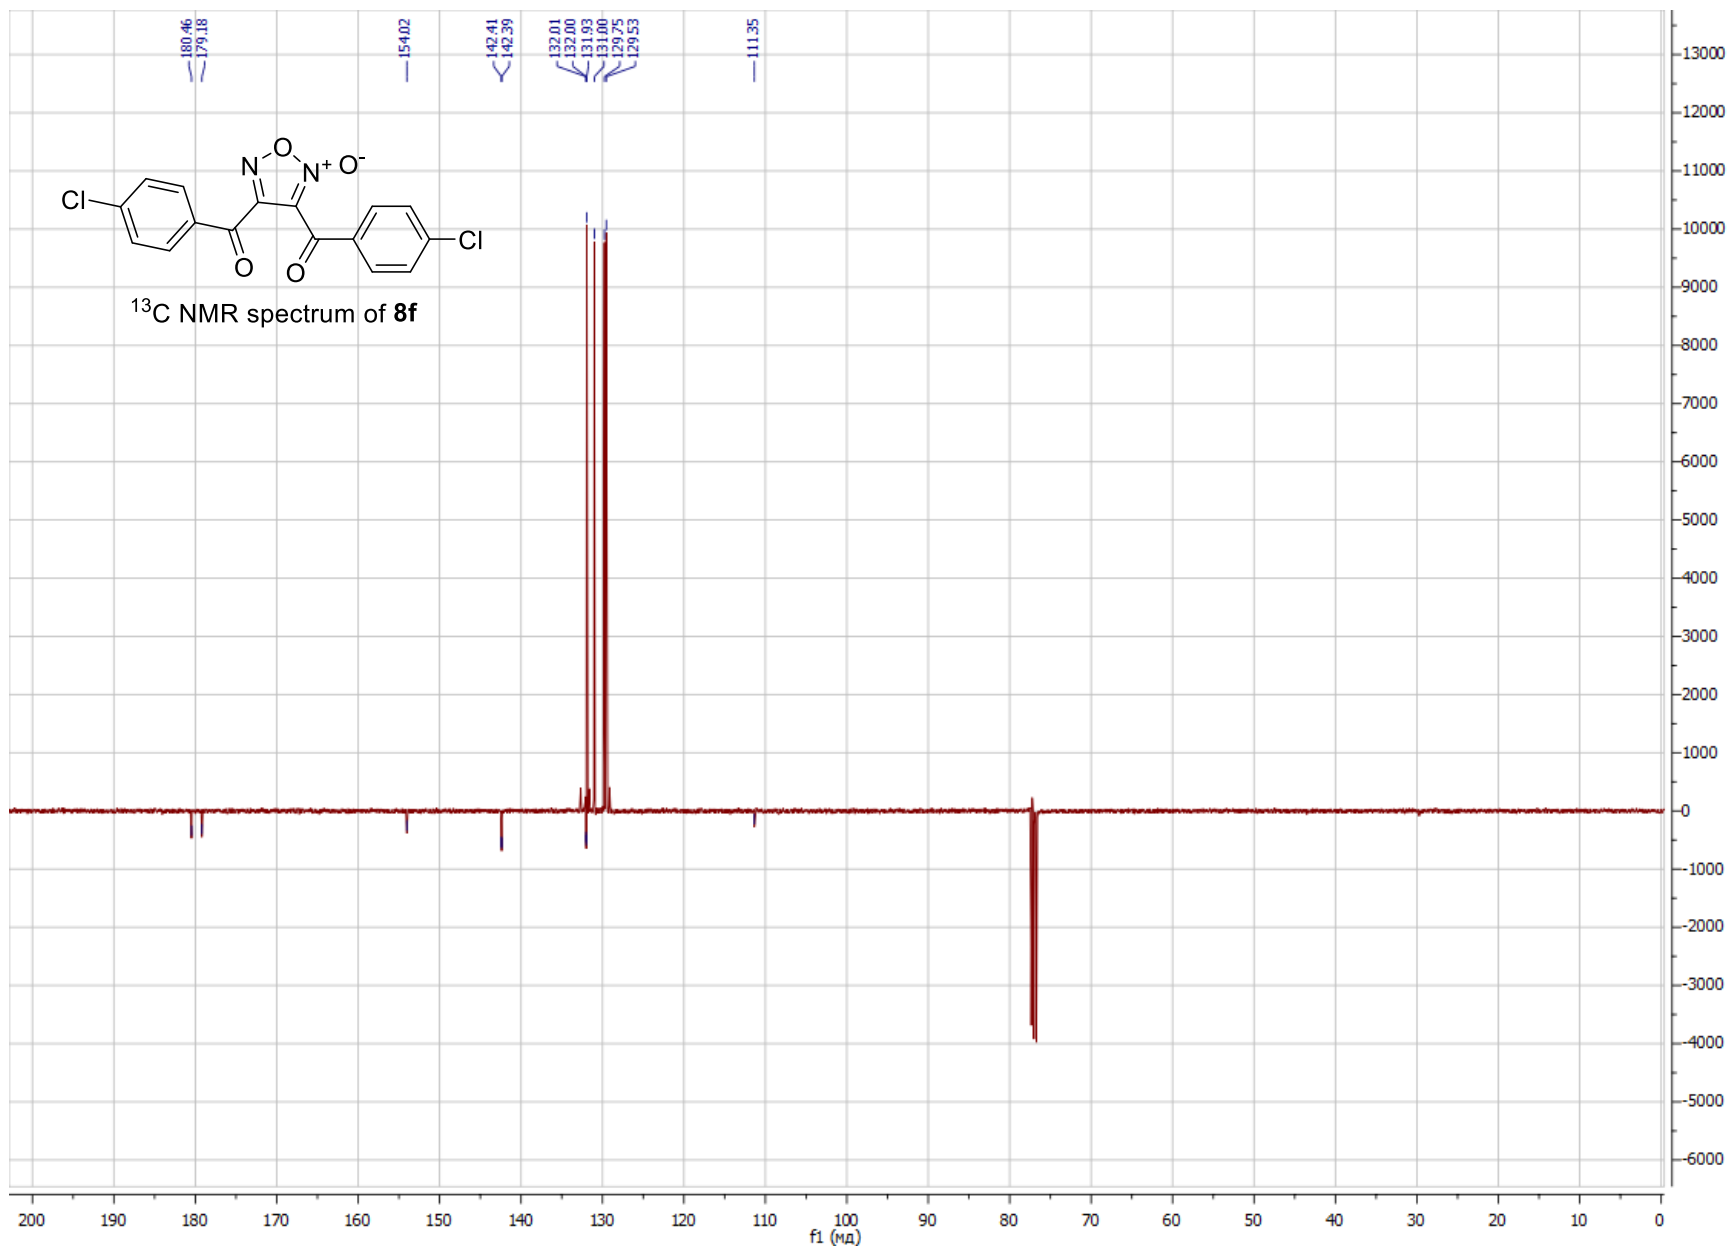

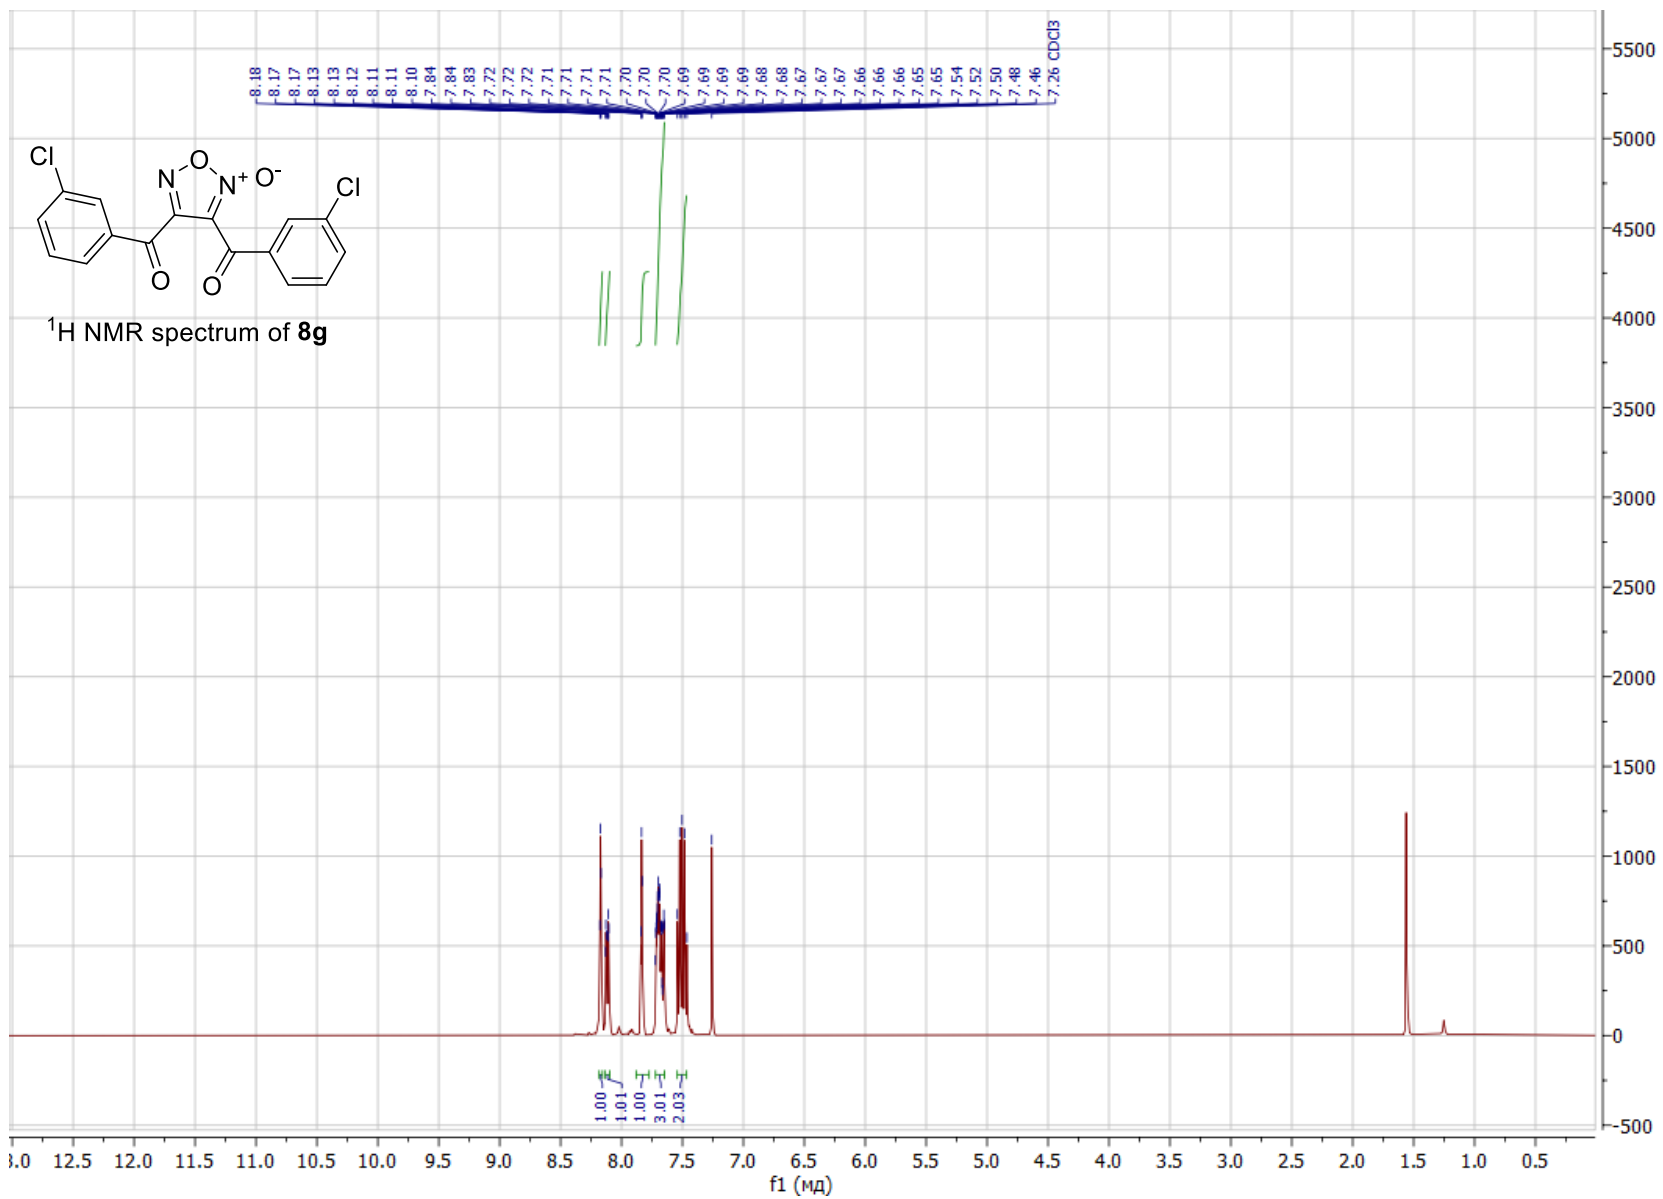



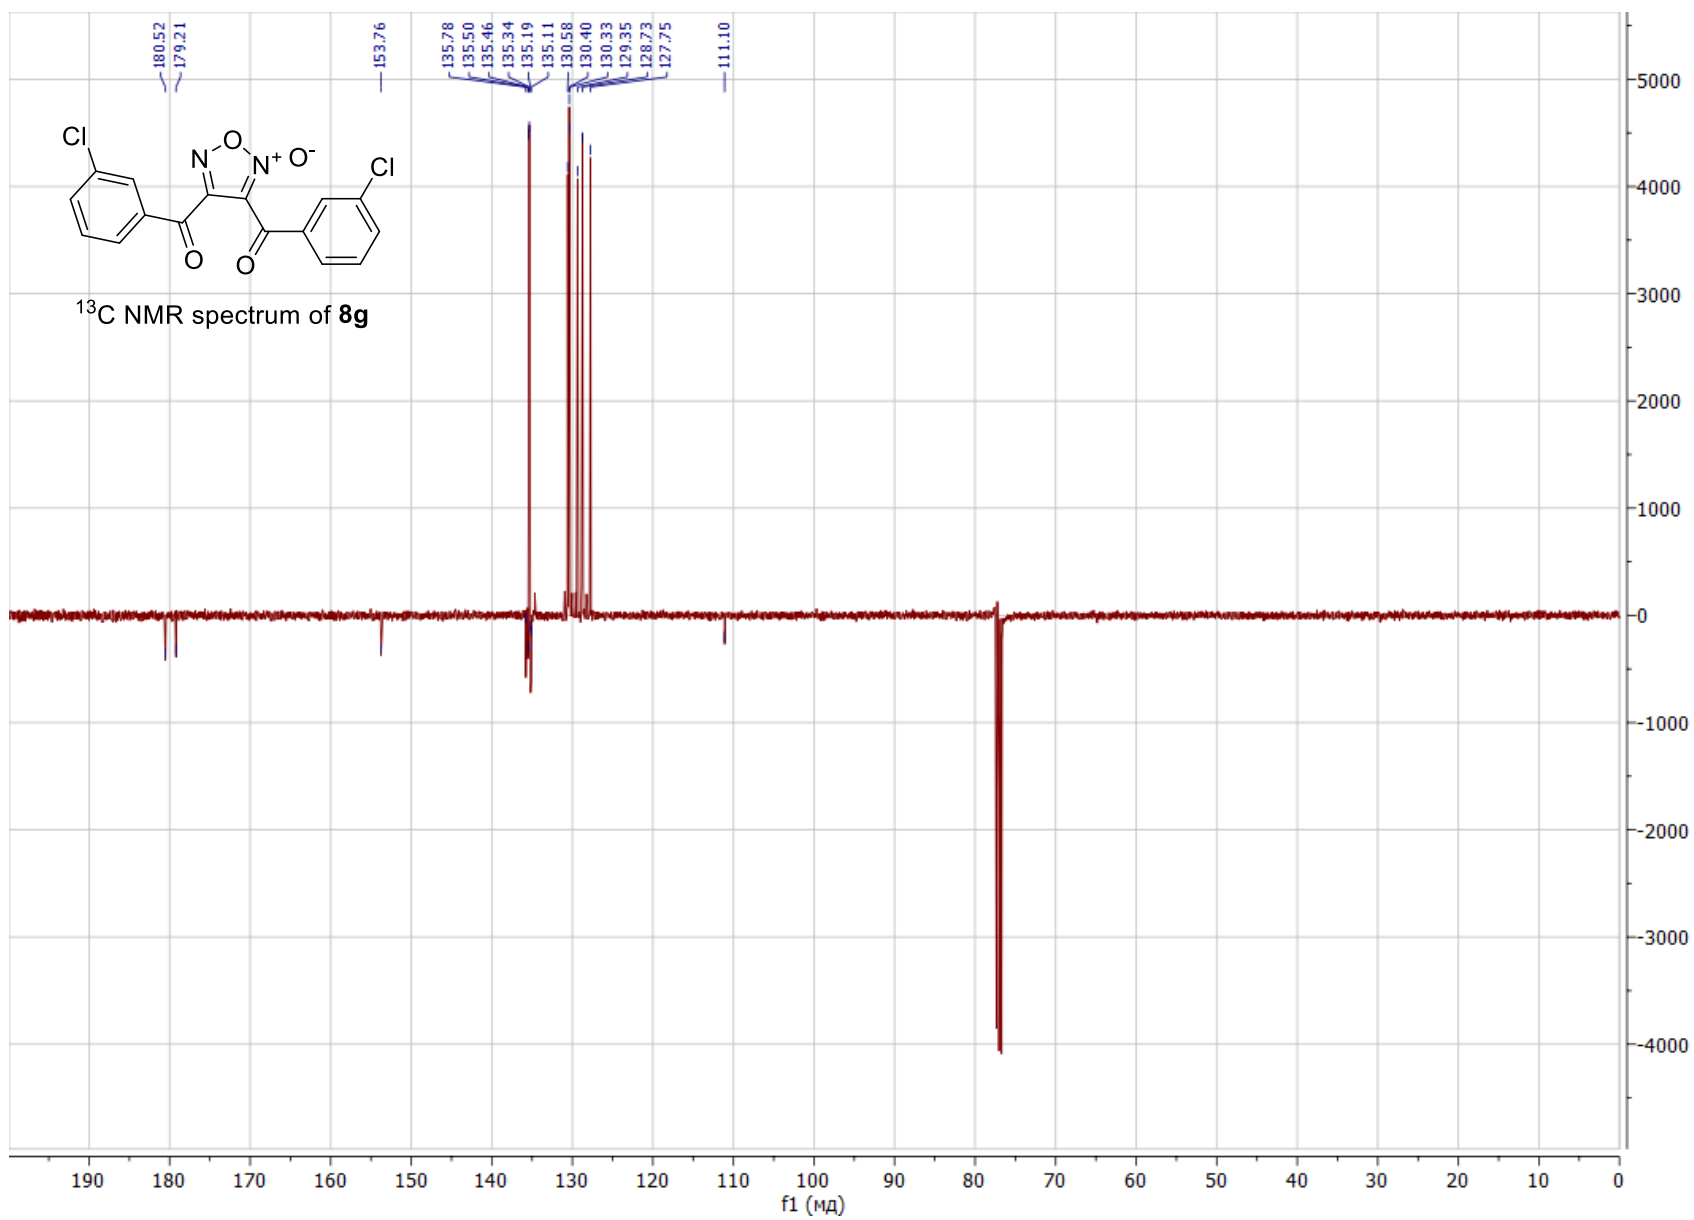

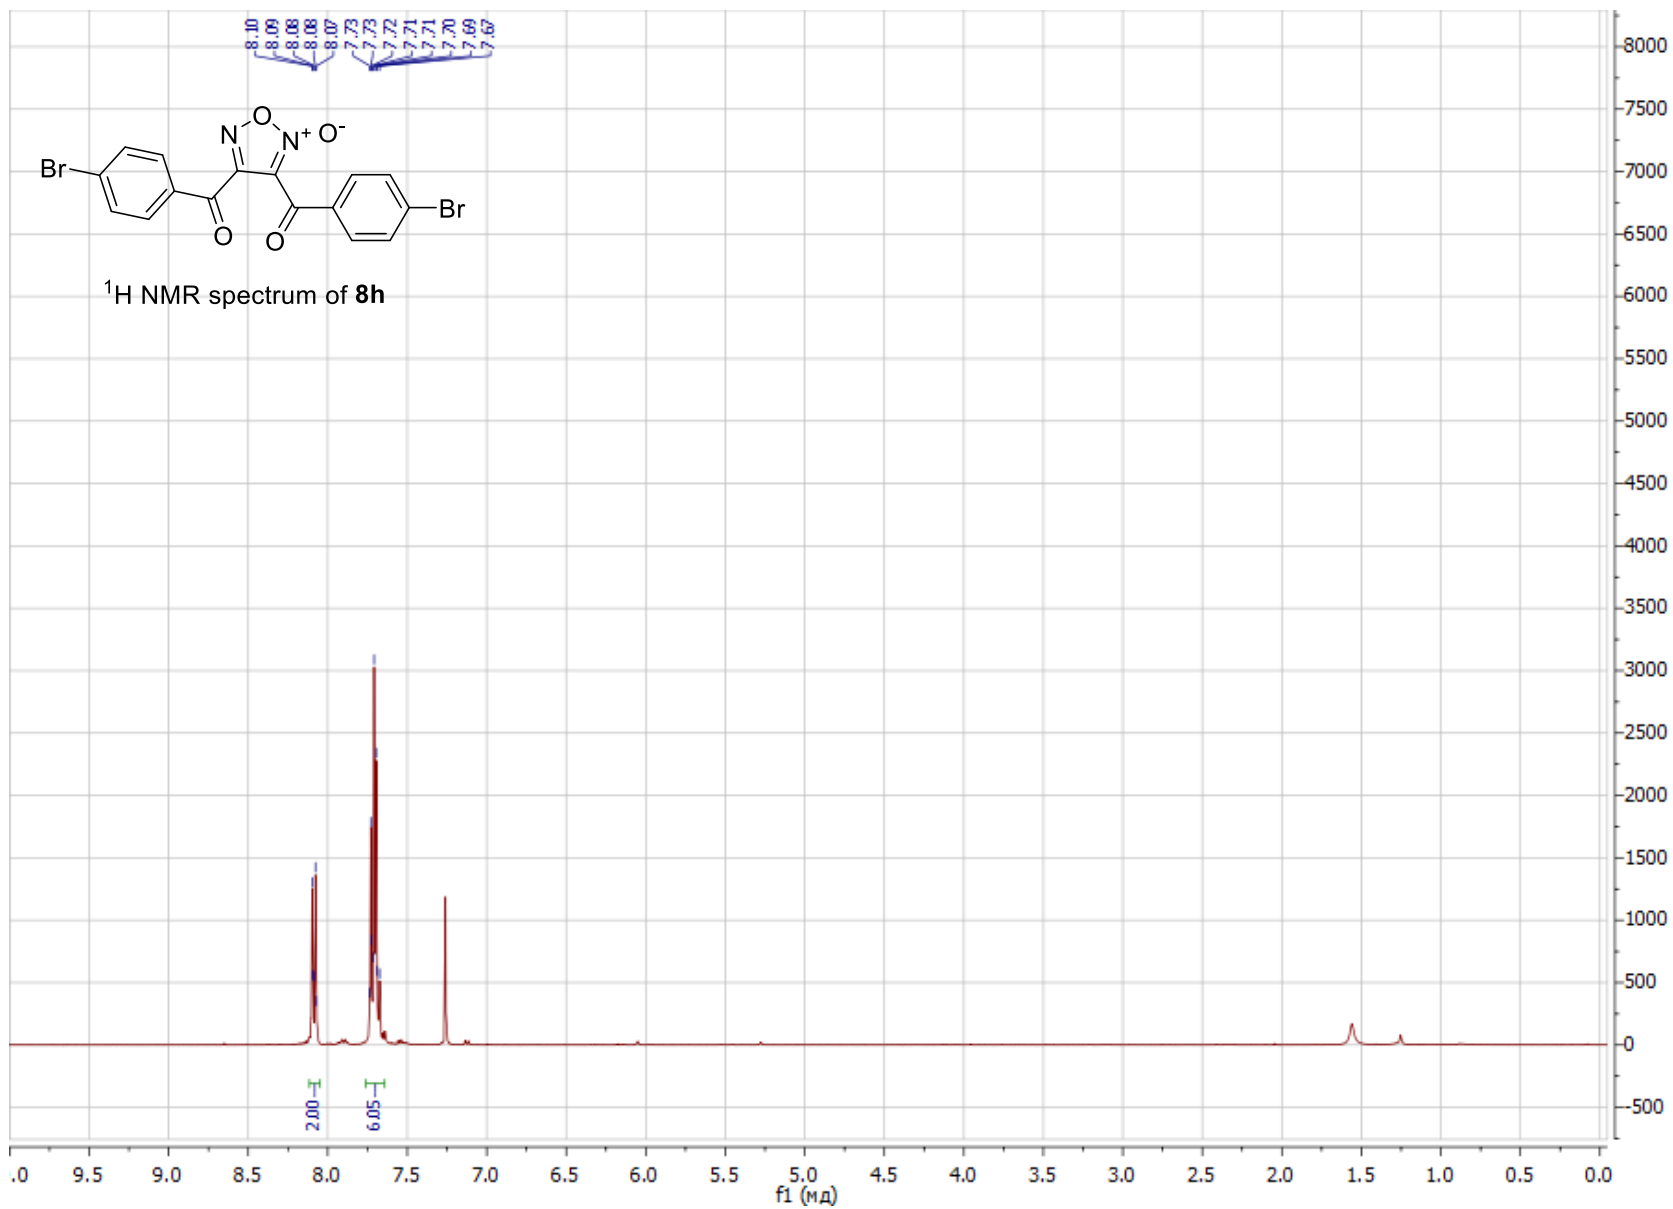

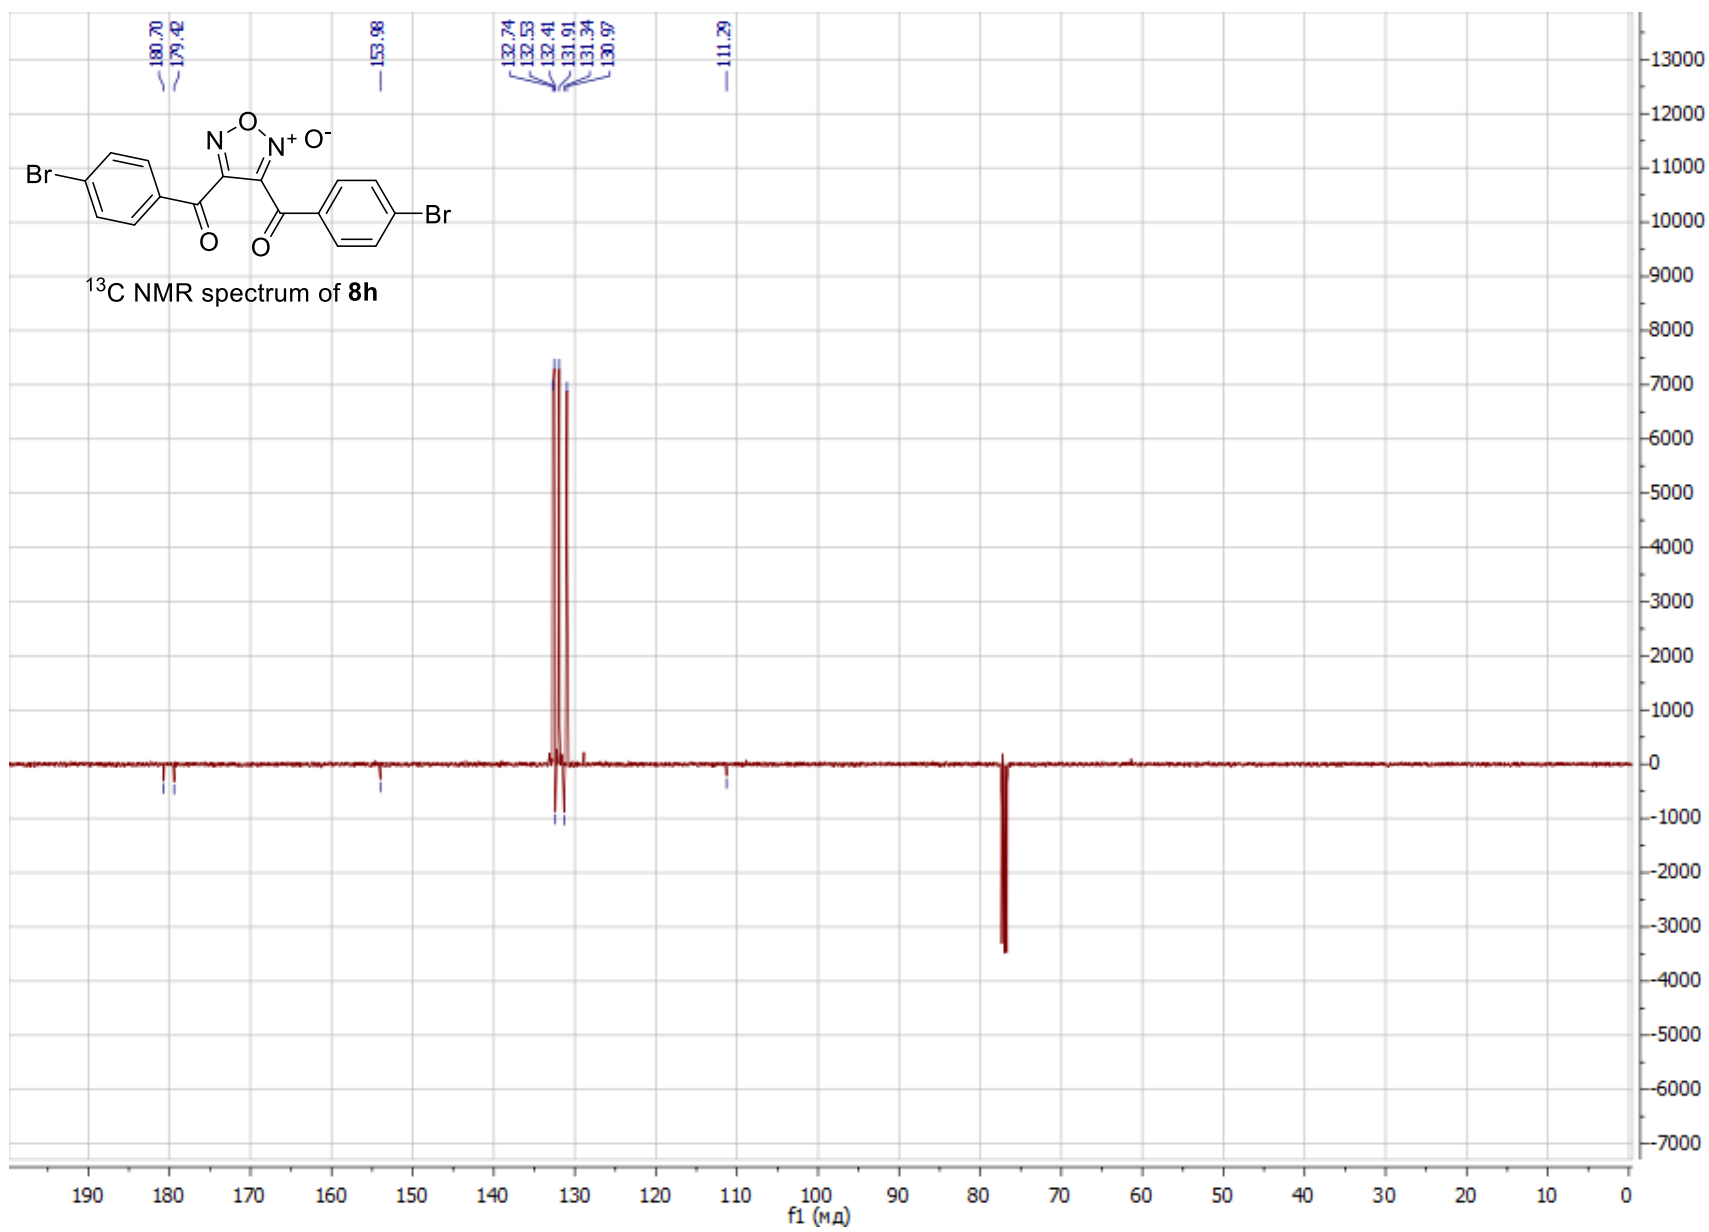

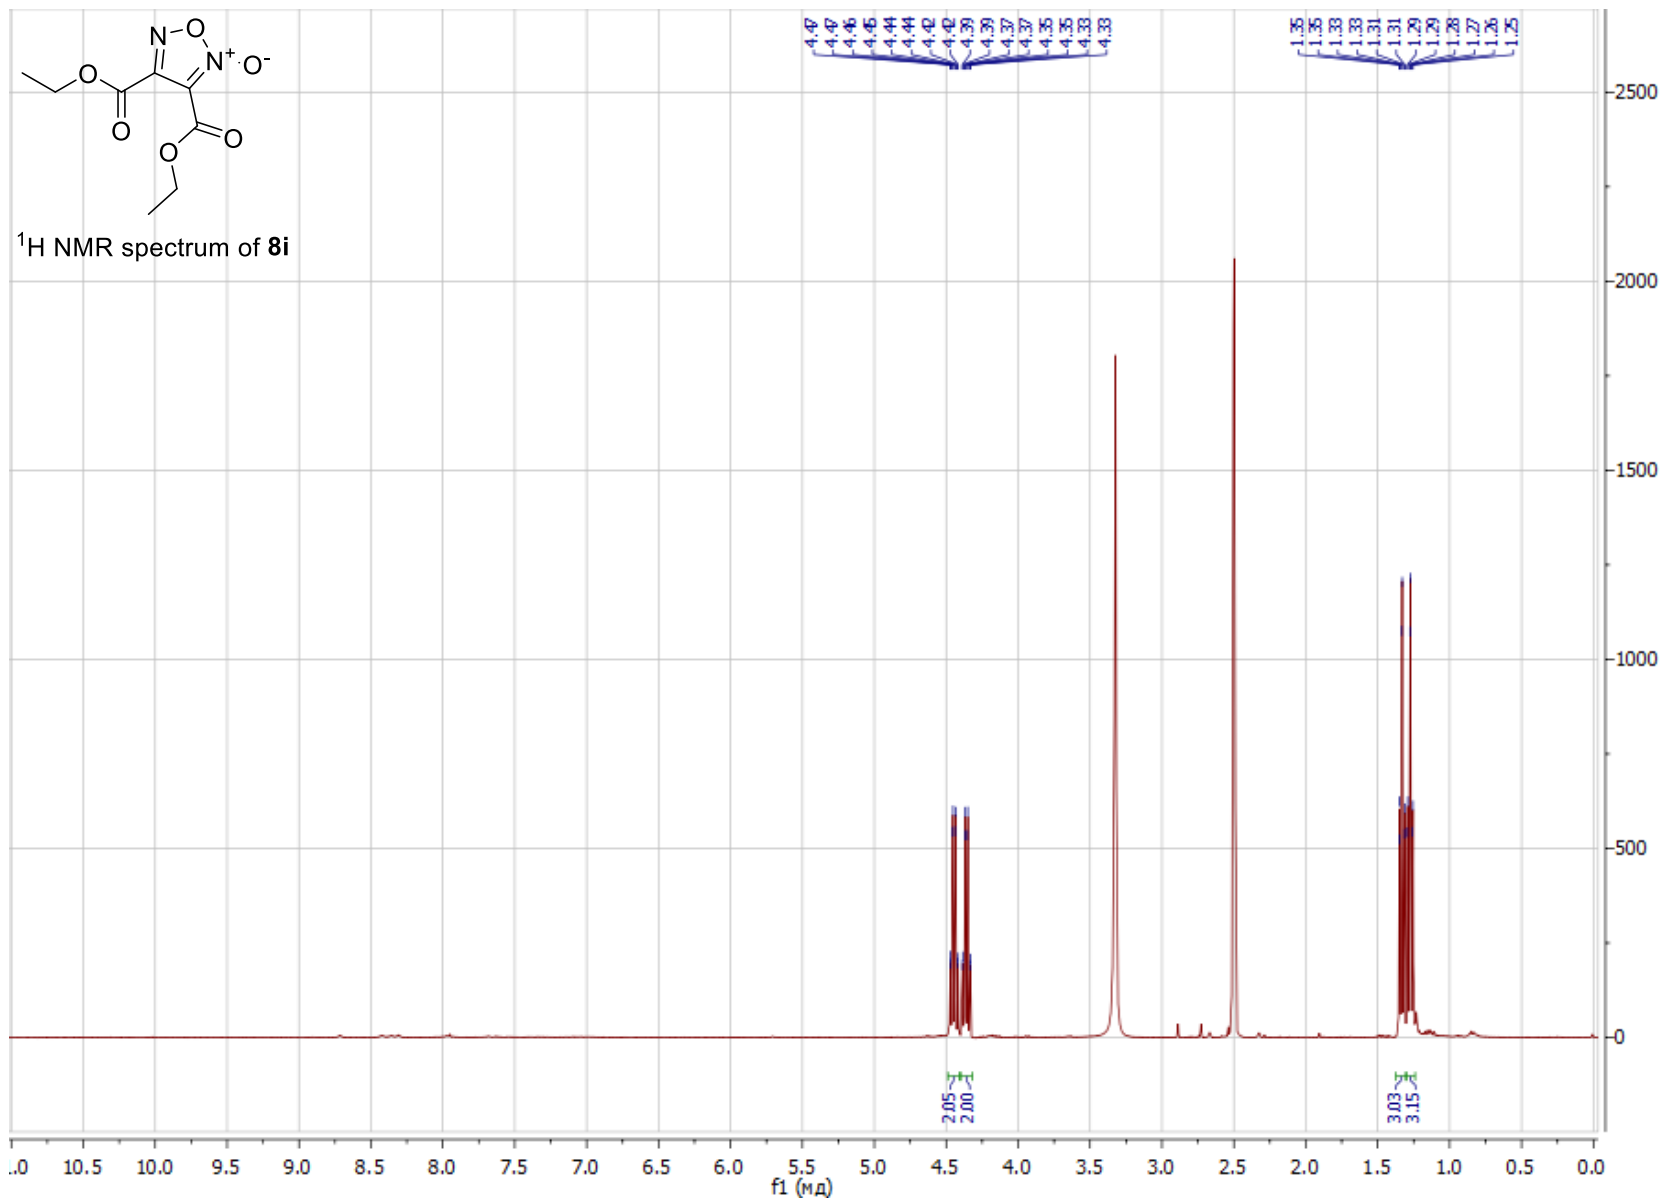

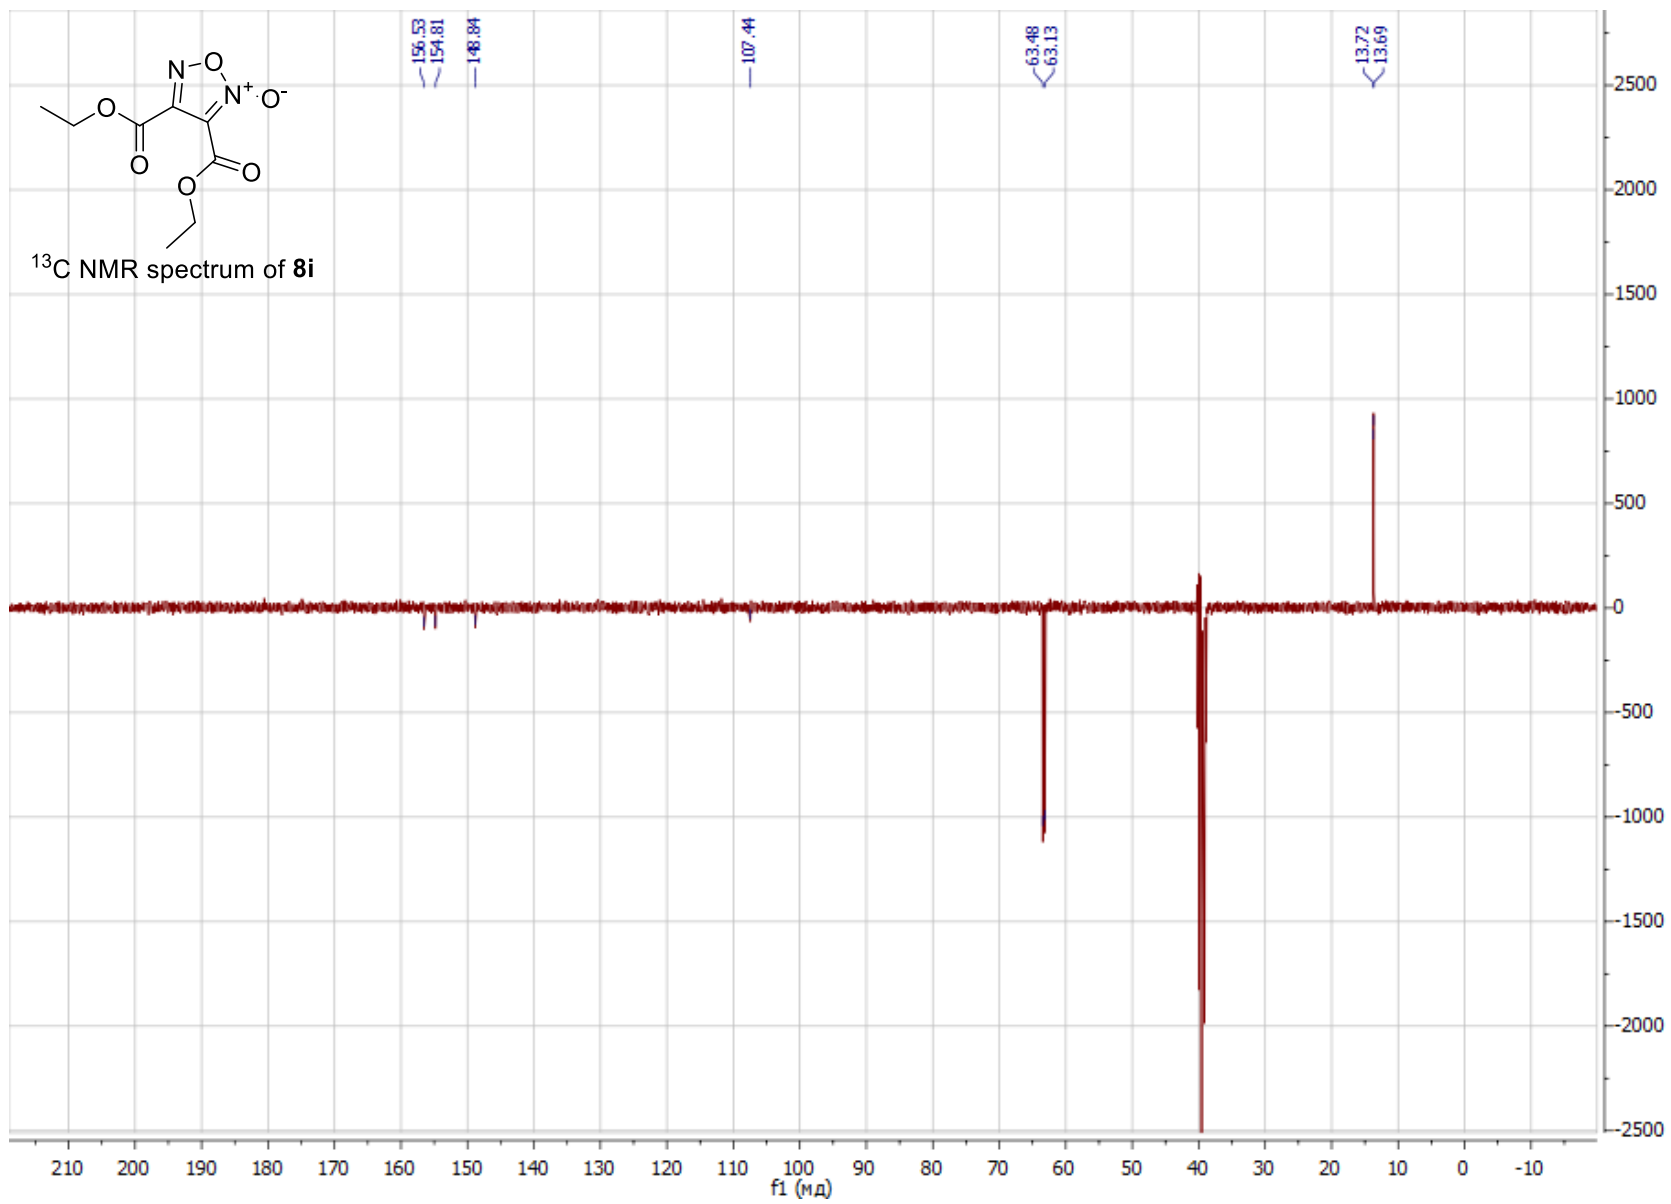

# <sup>1</sup>H and <sup>13</sup>C NMR spectral charts for isoxazoles 10

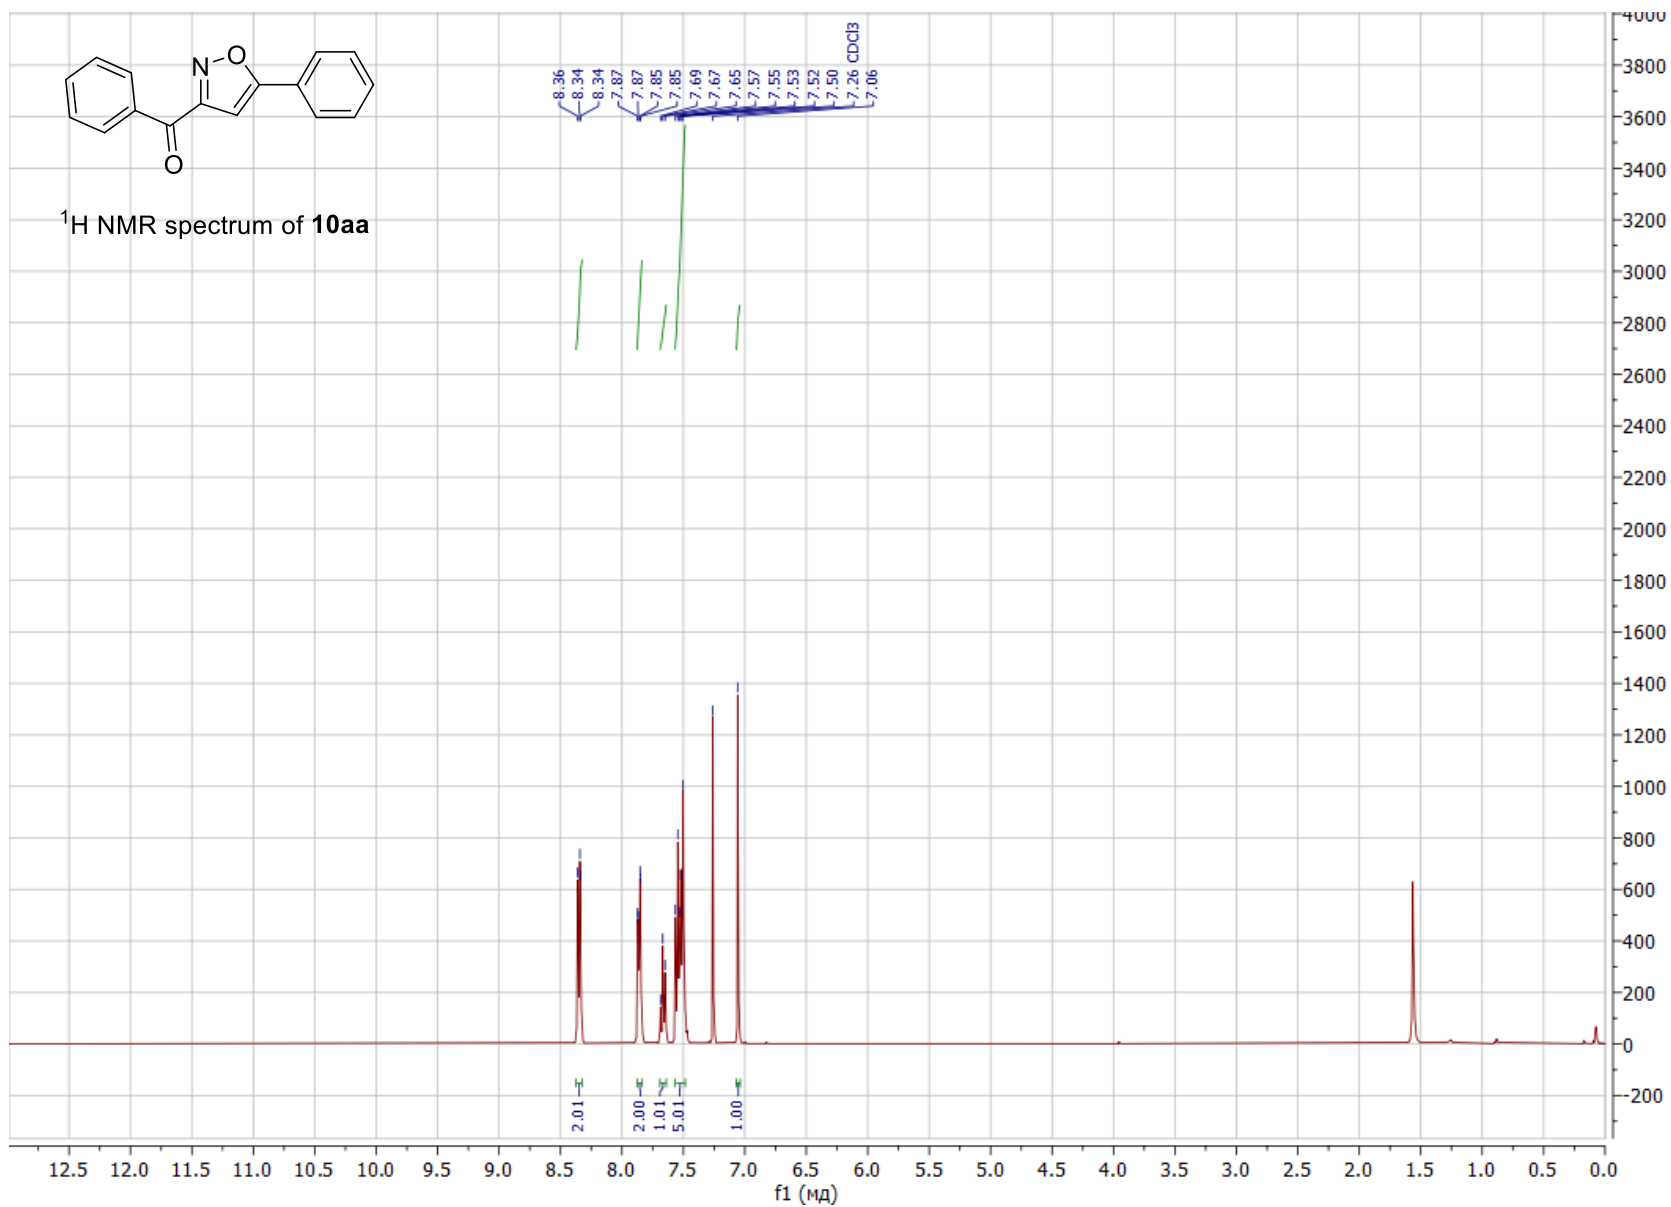

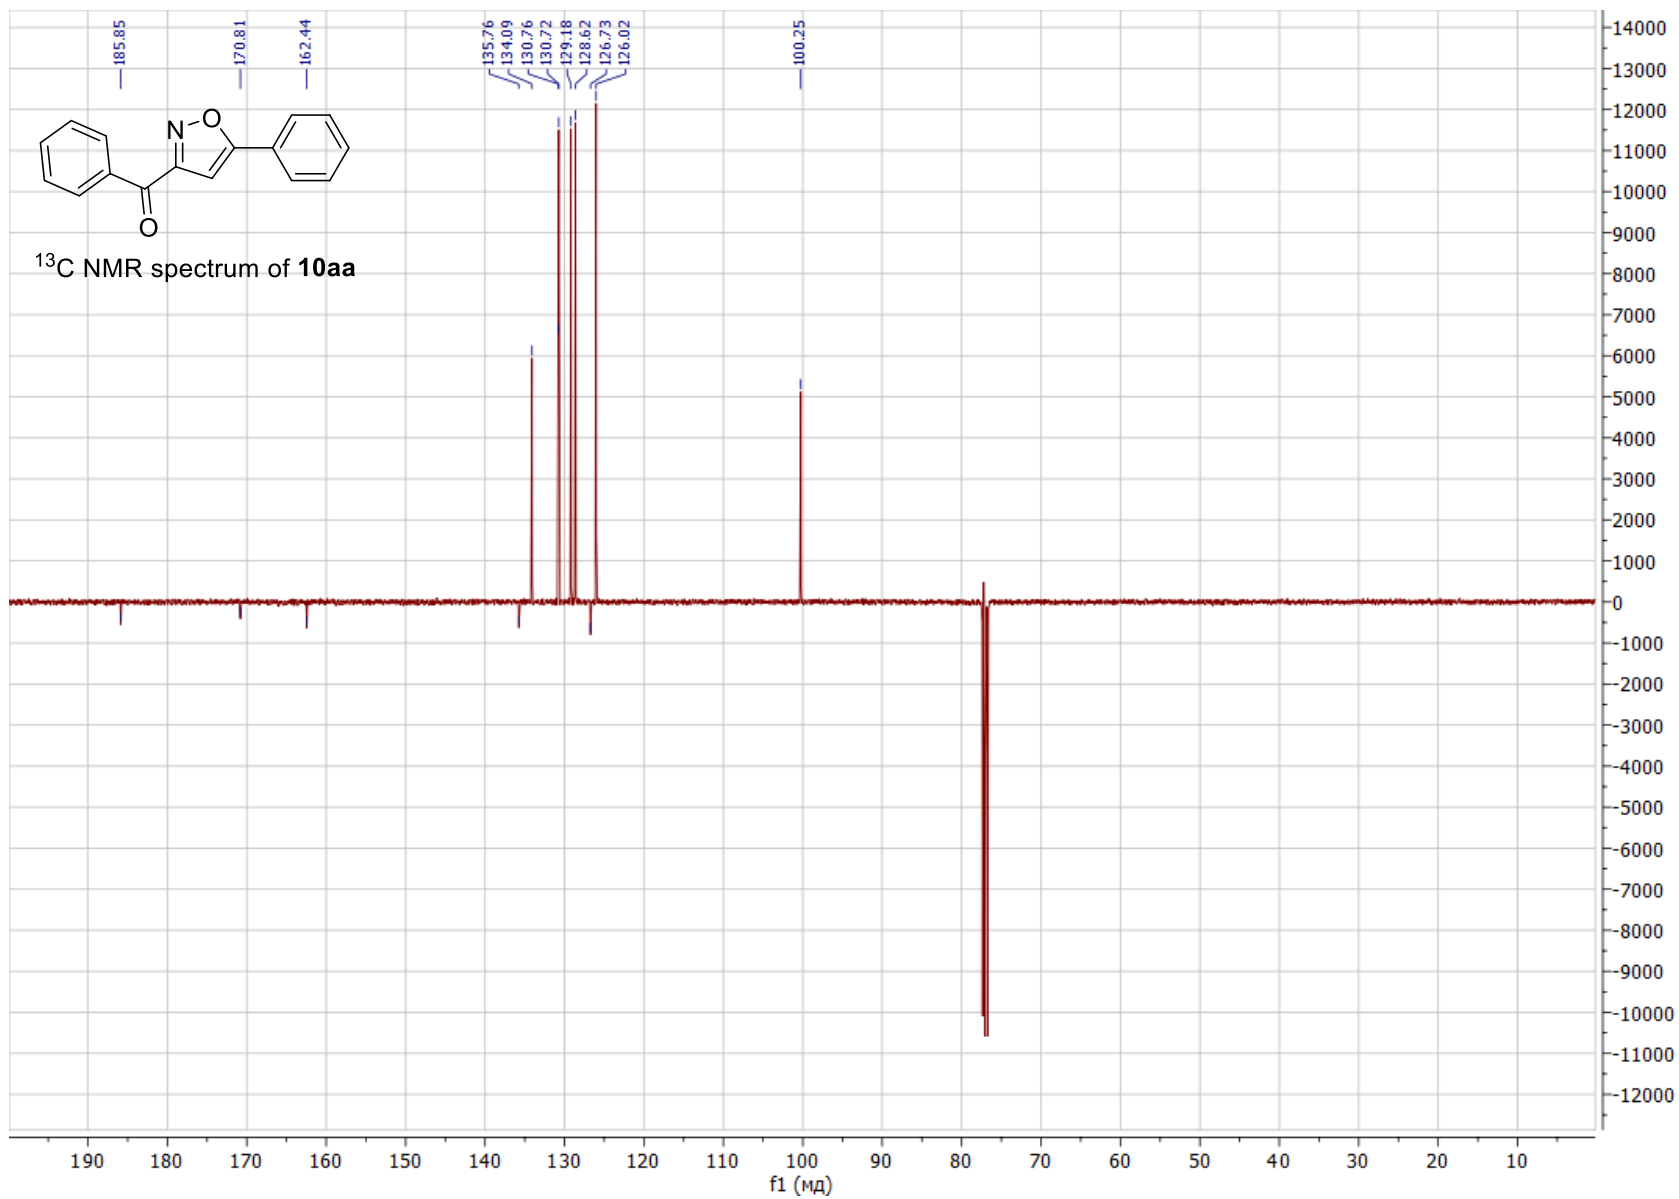

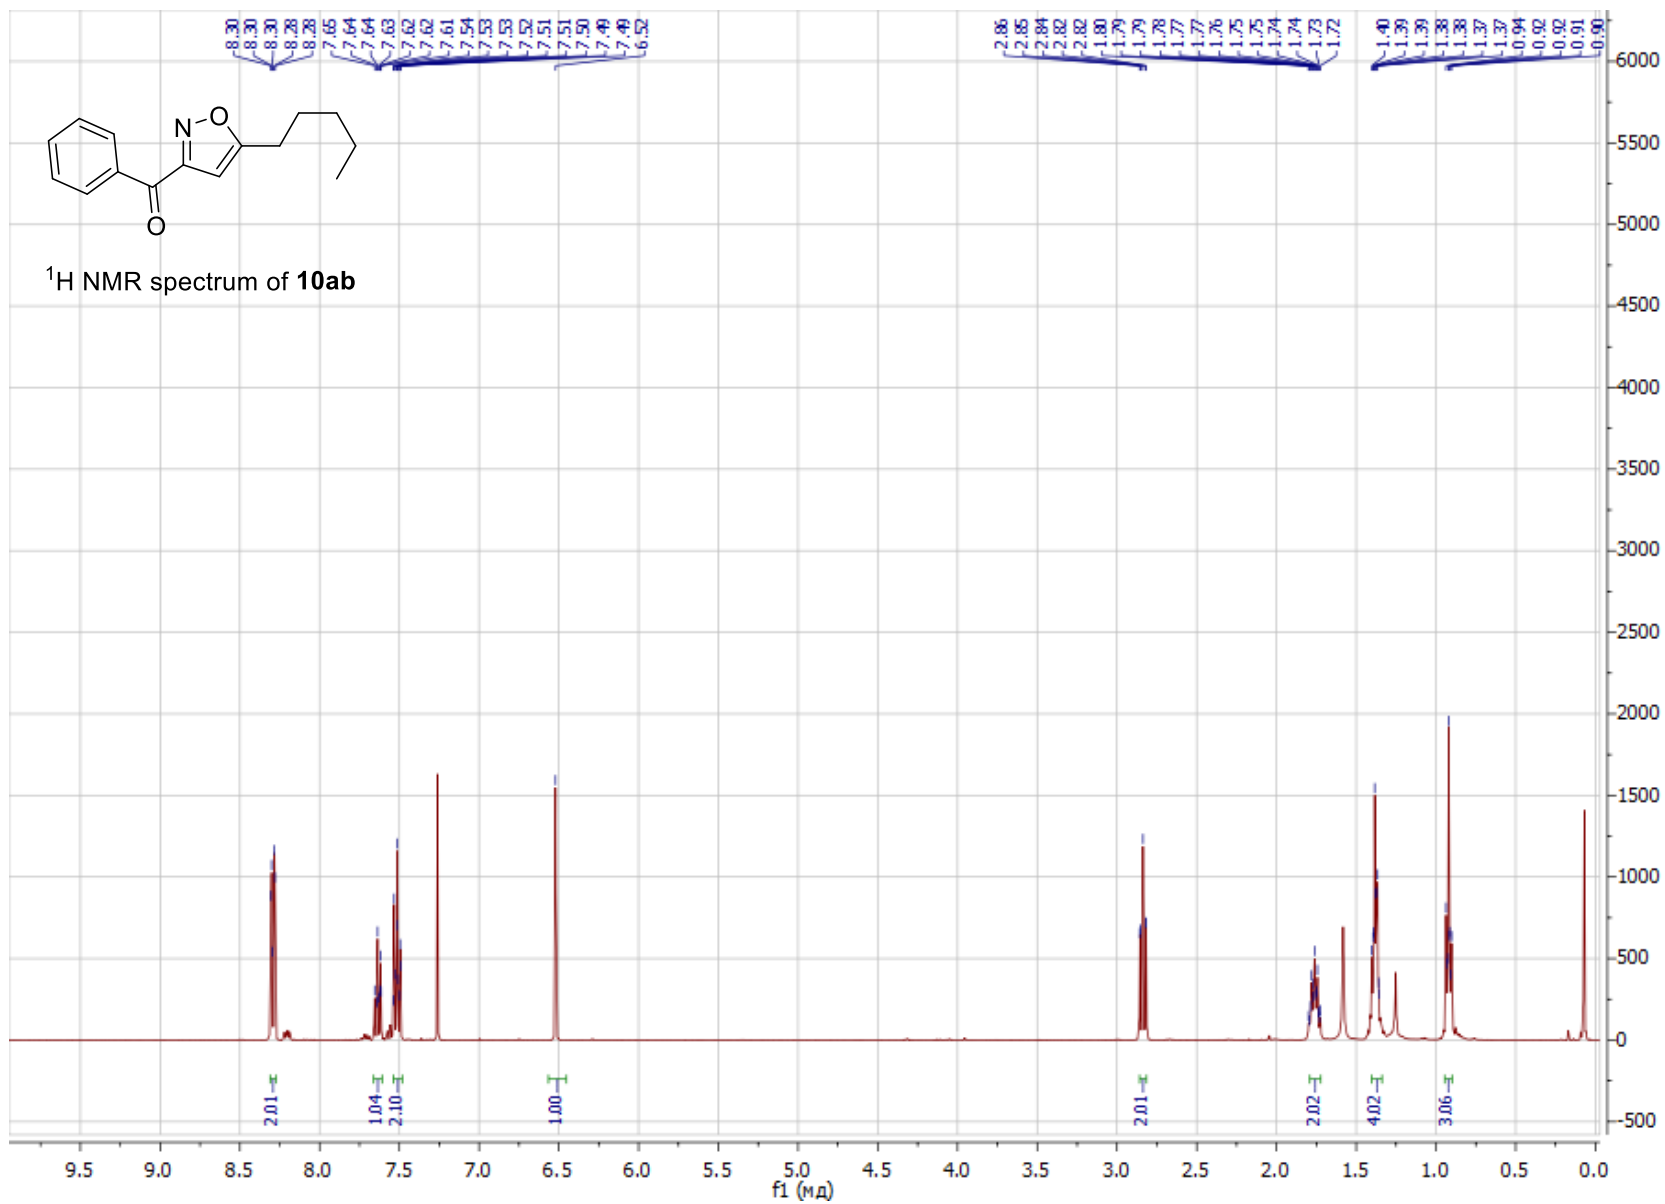



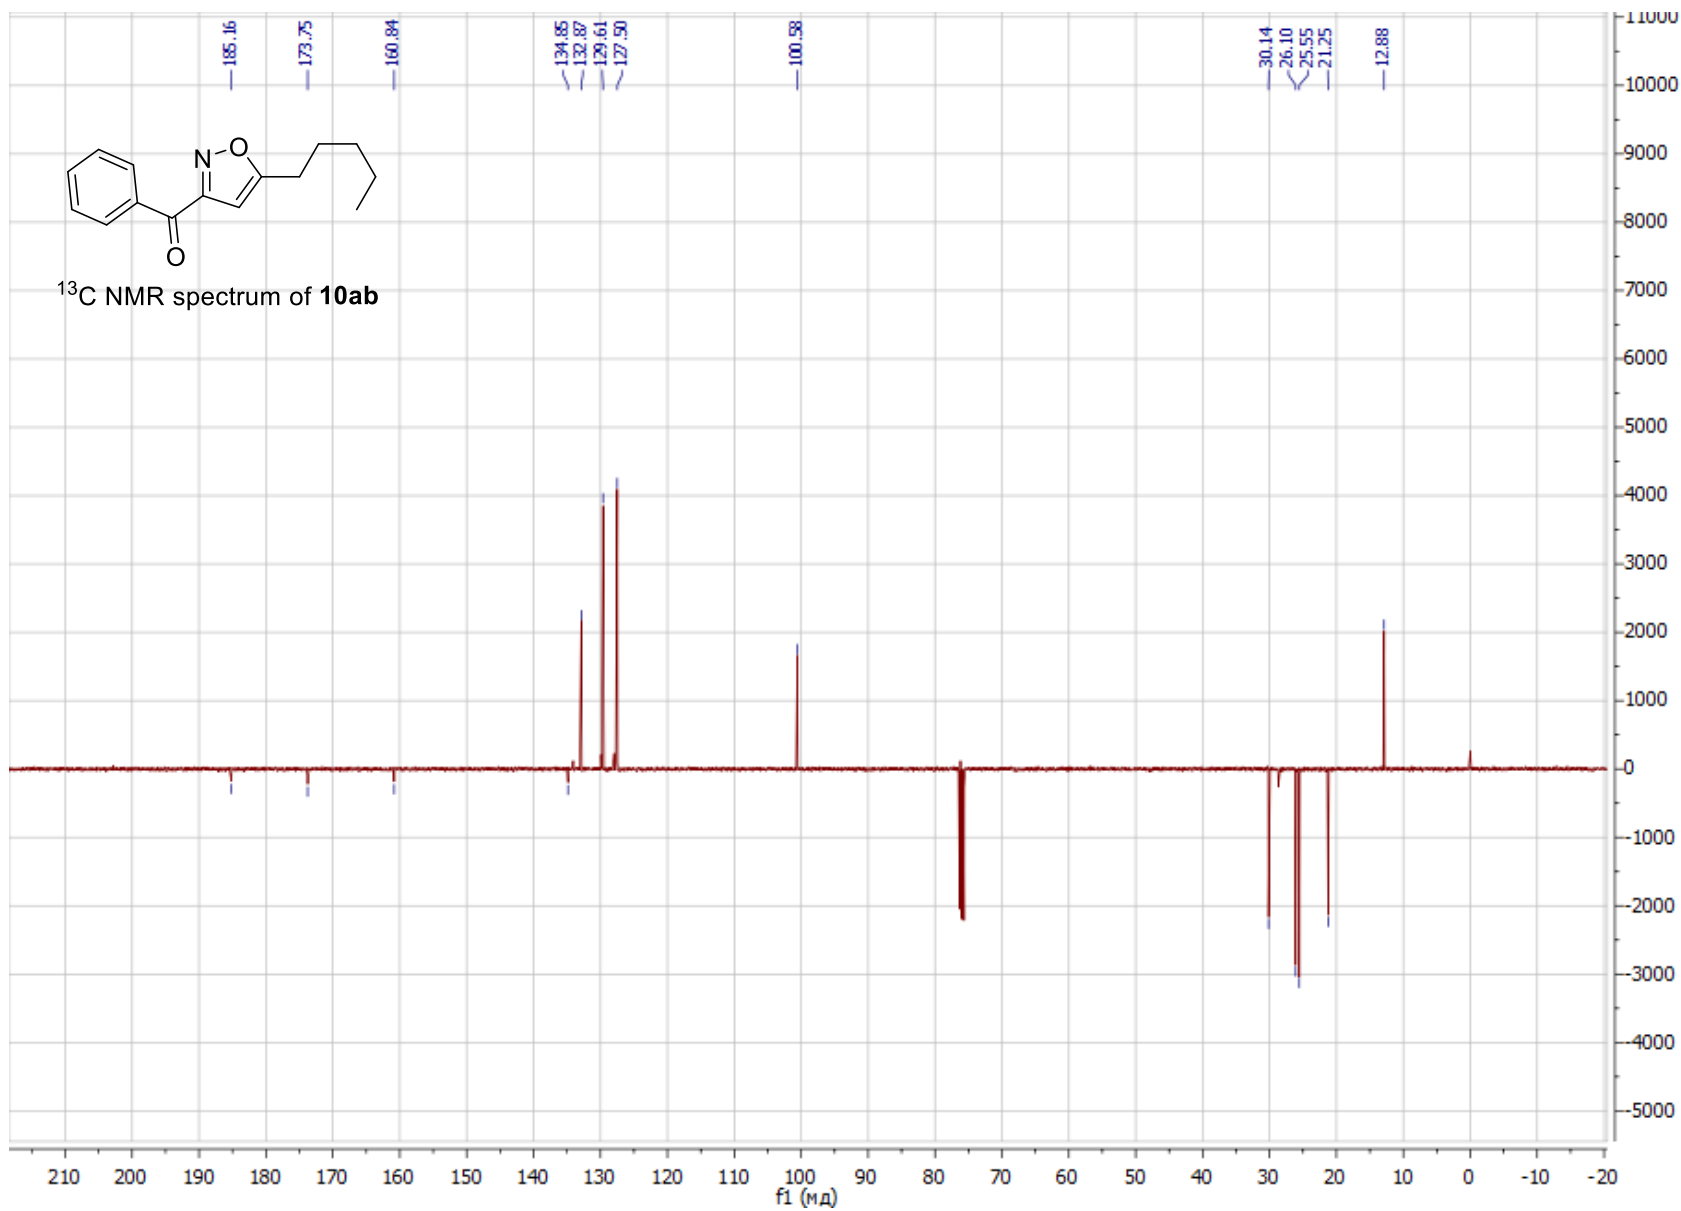

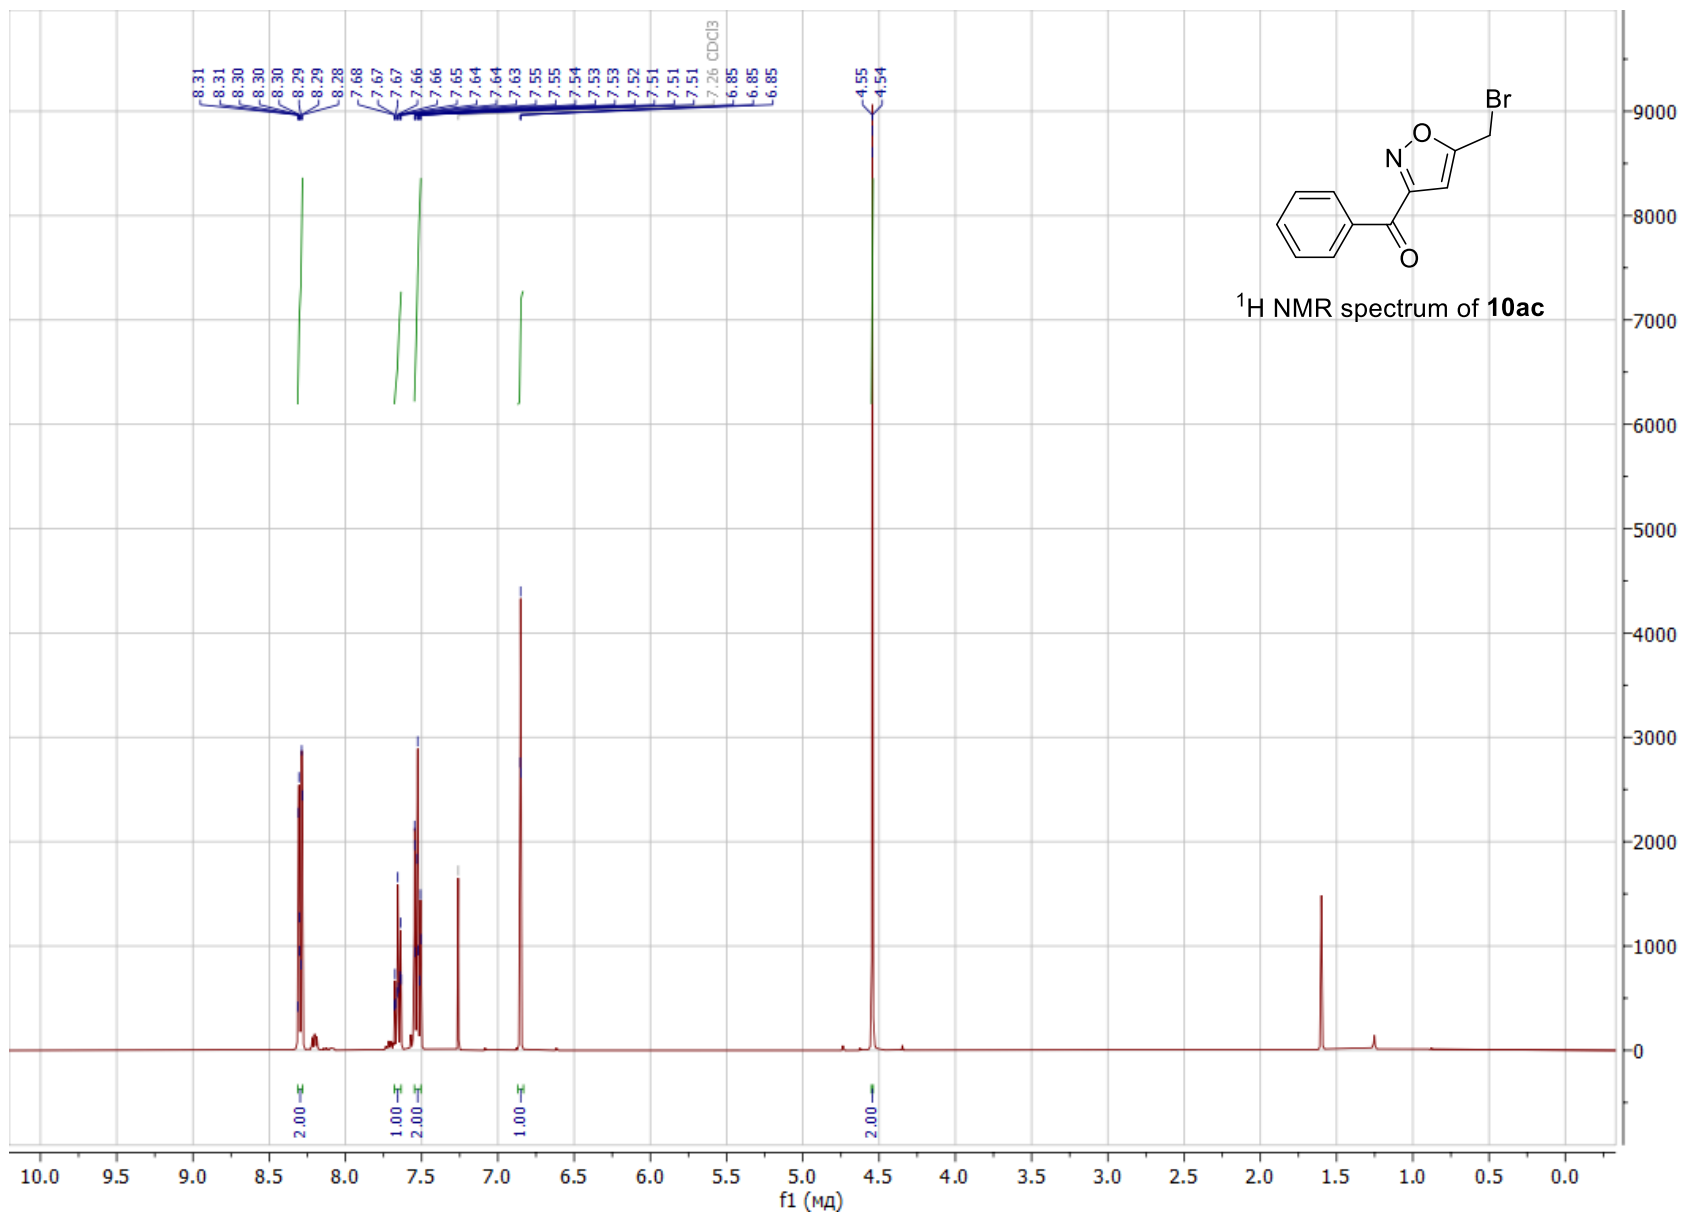

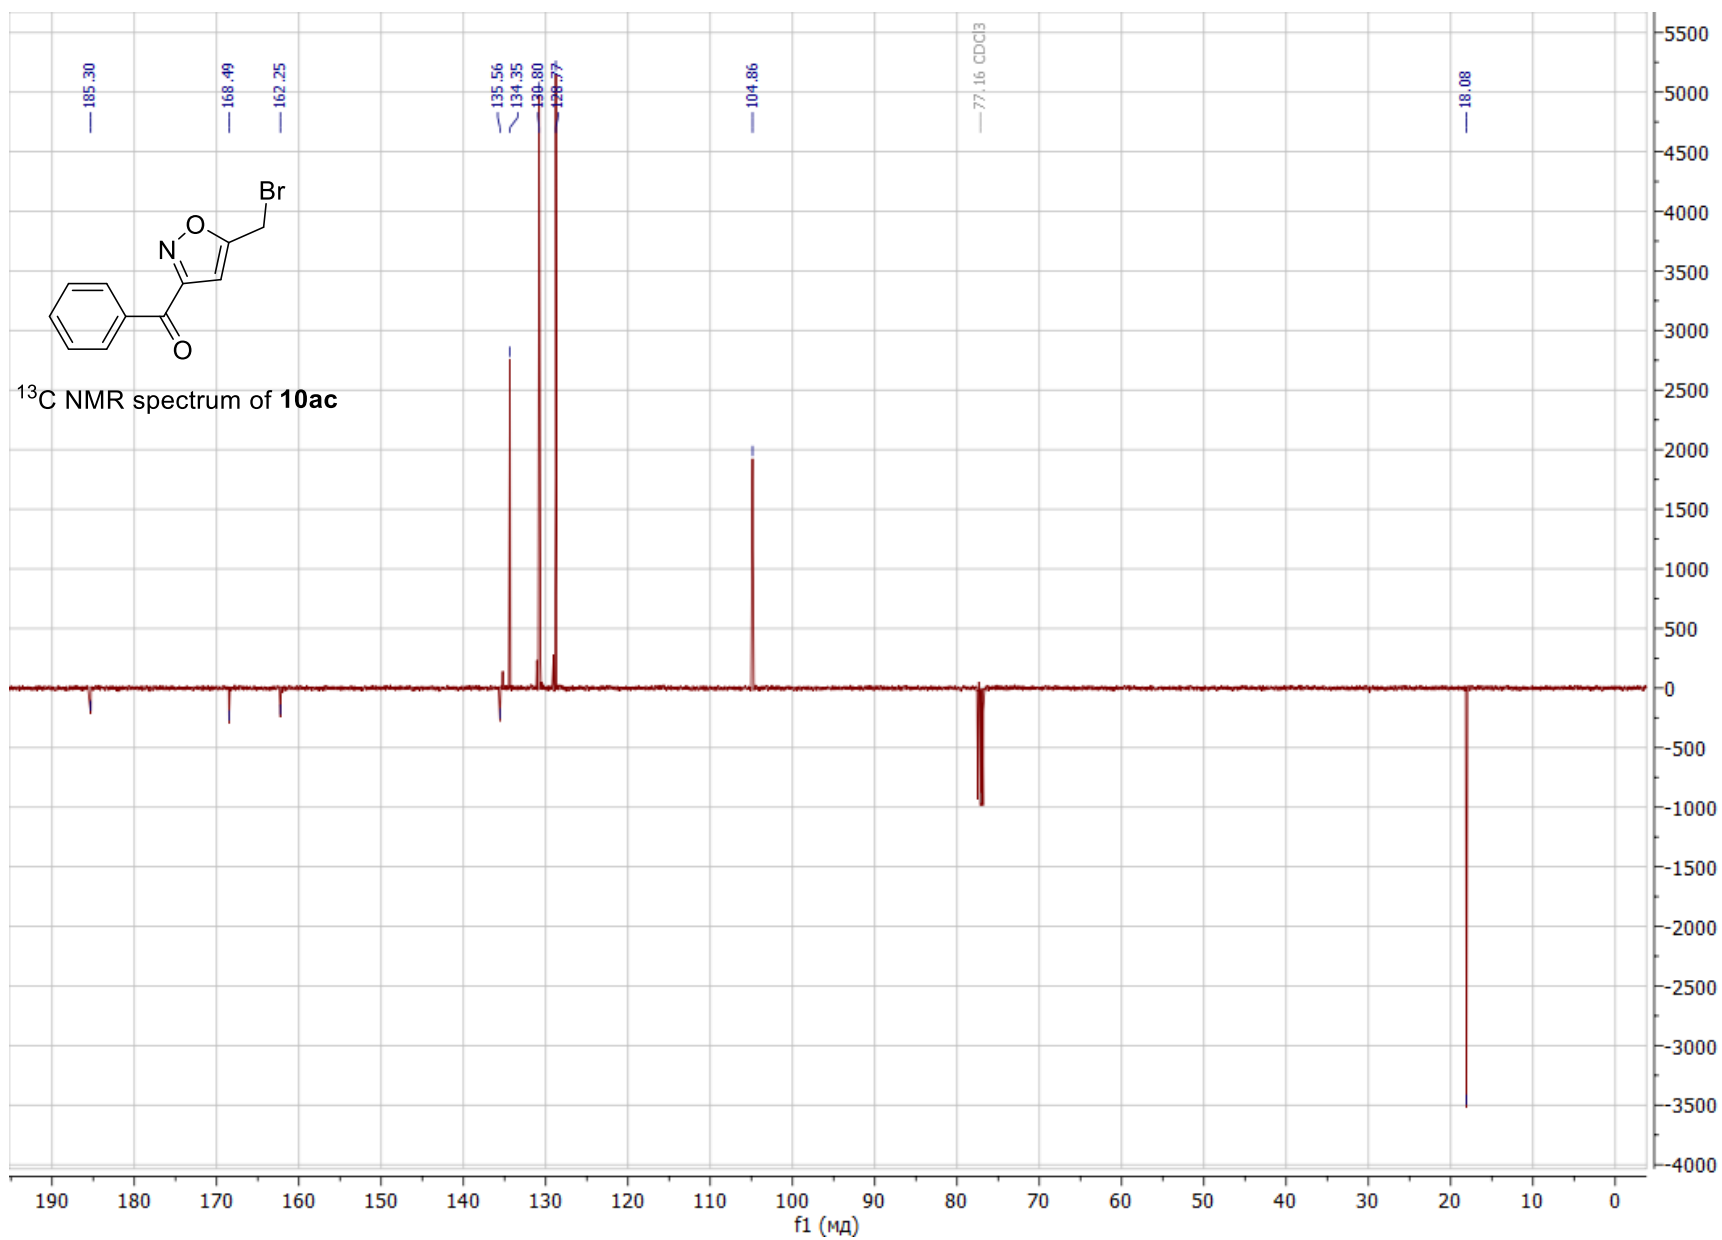

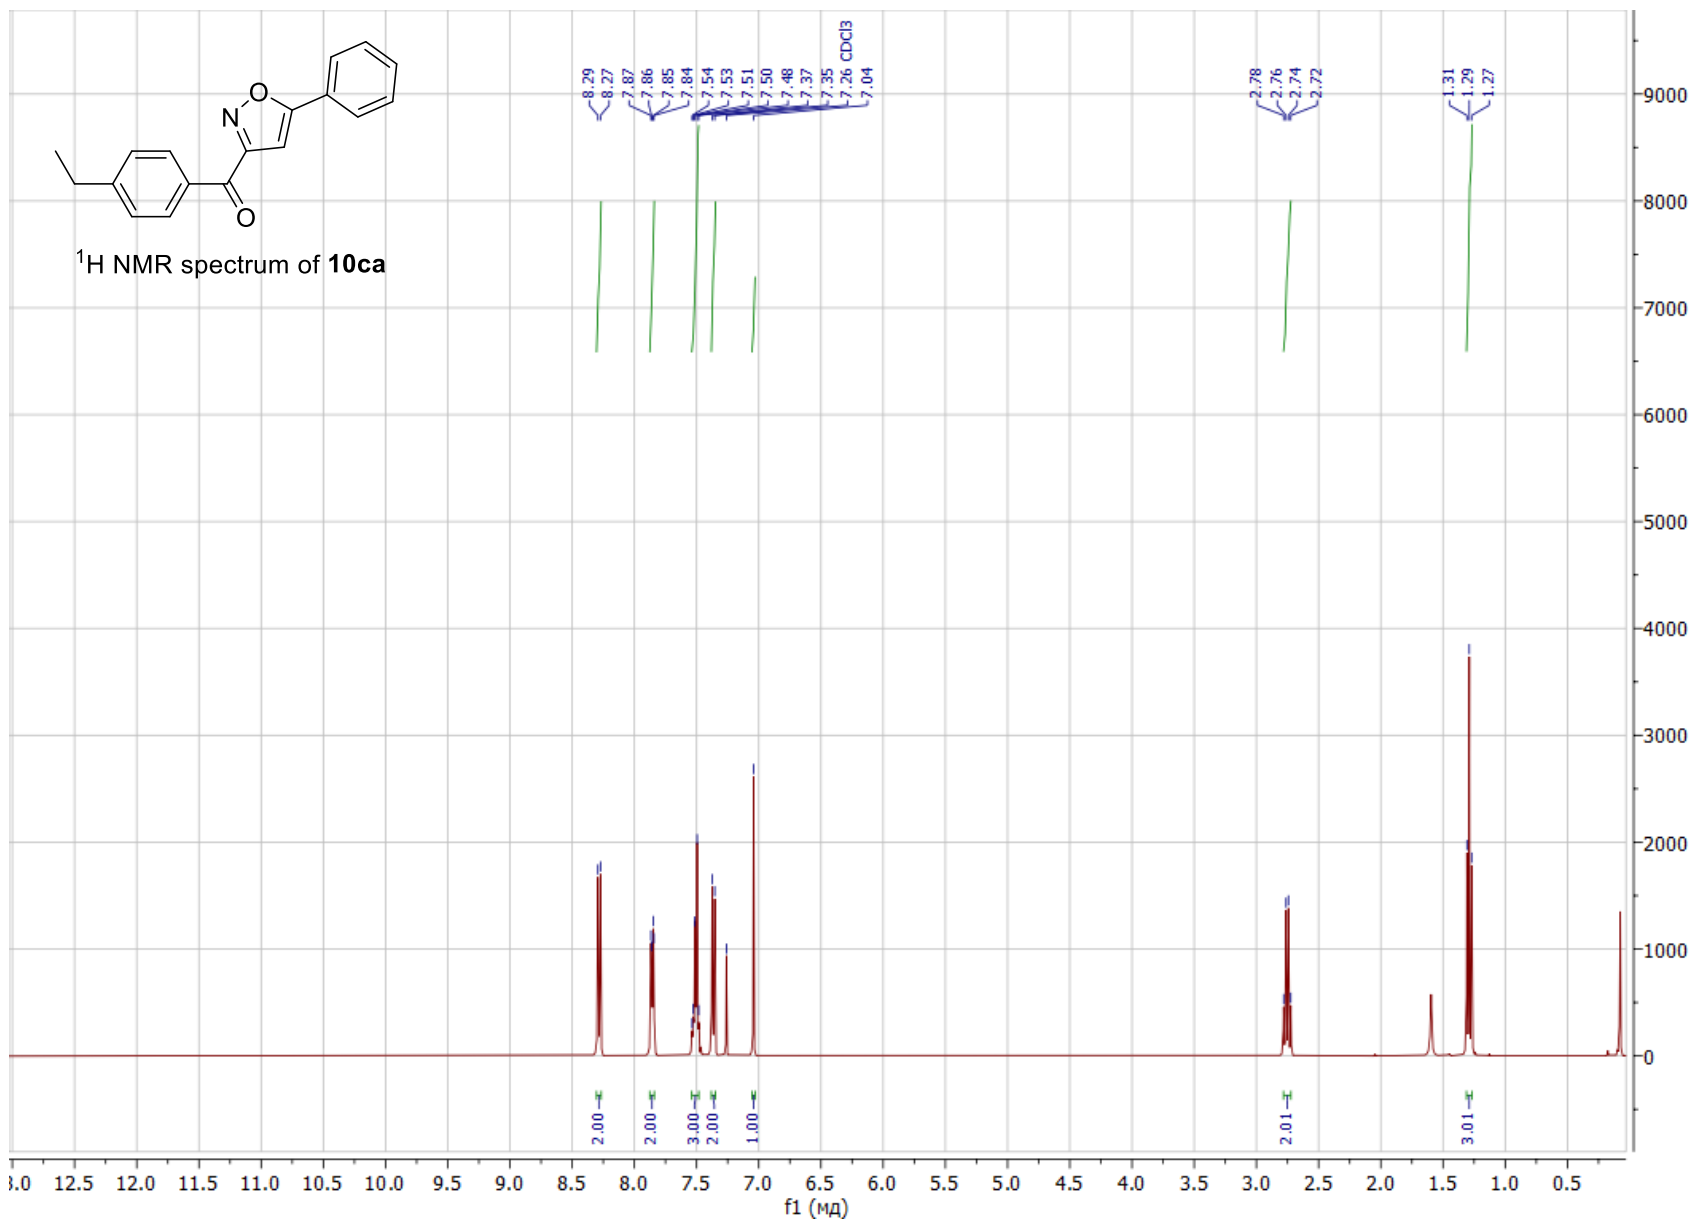

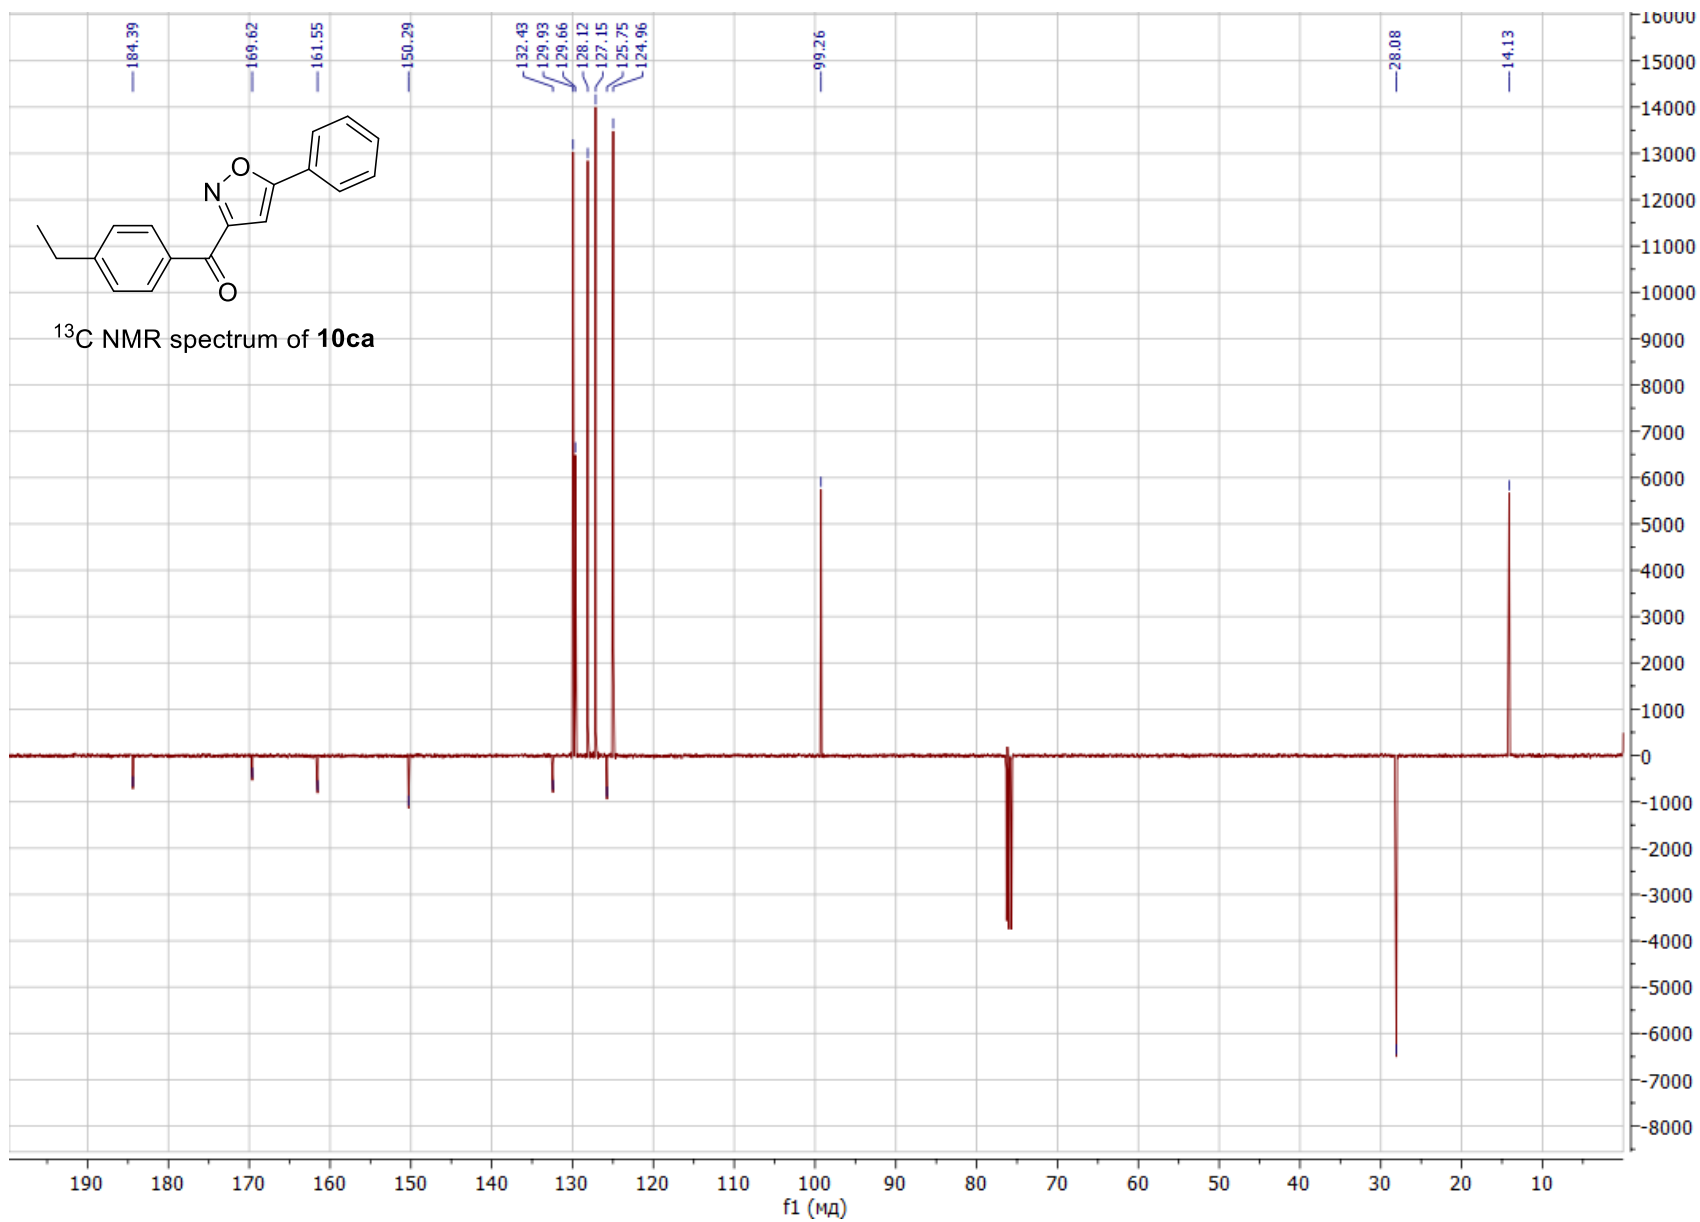

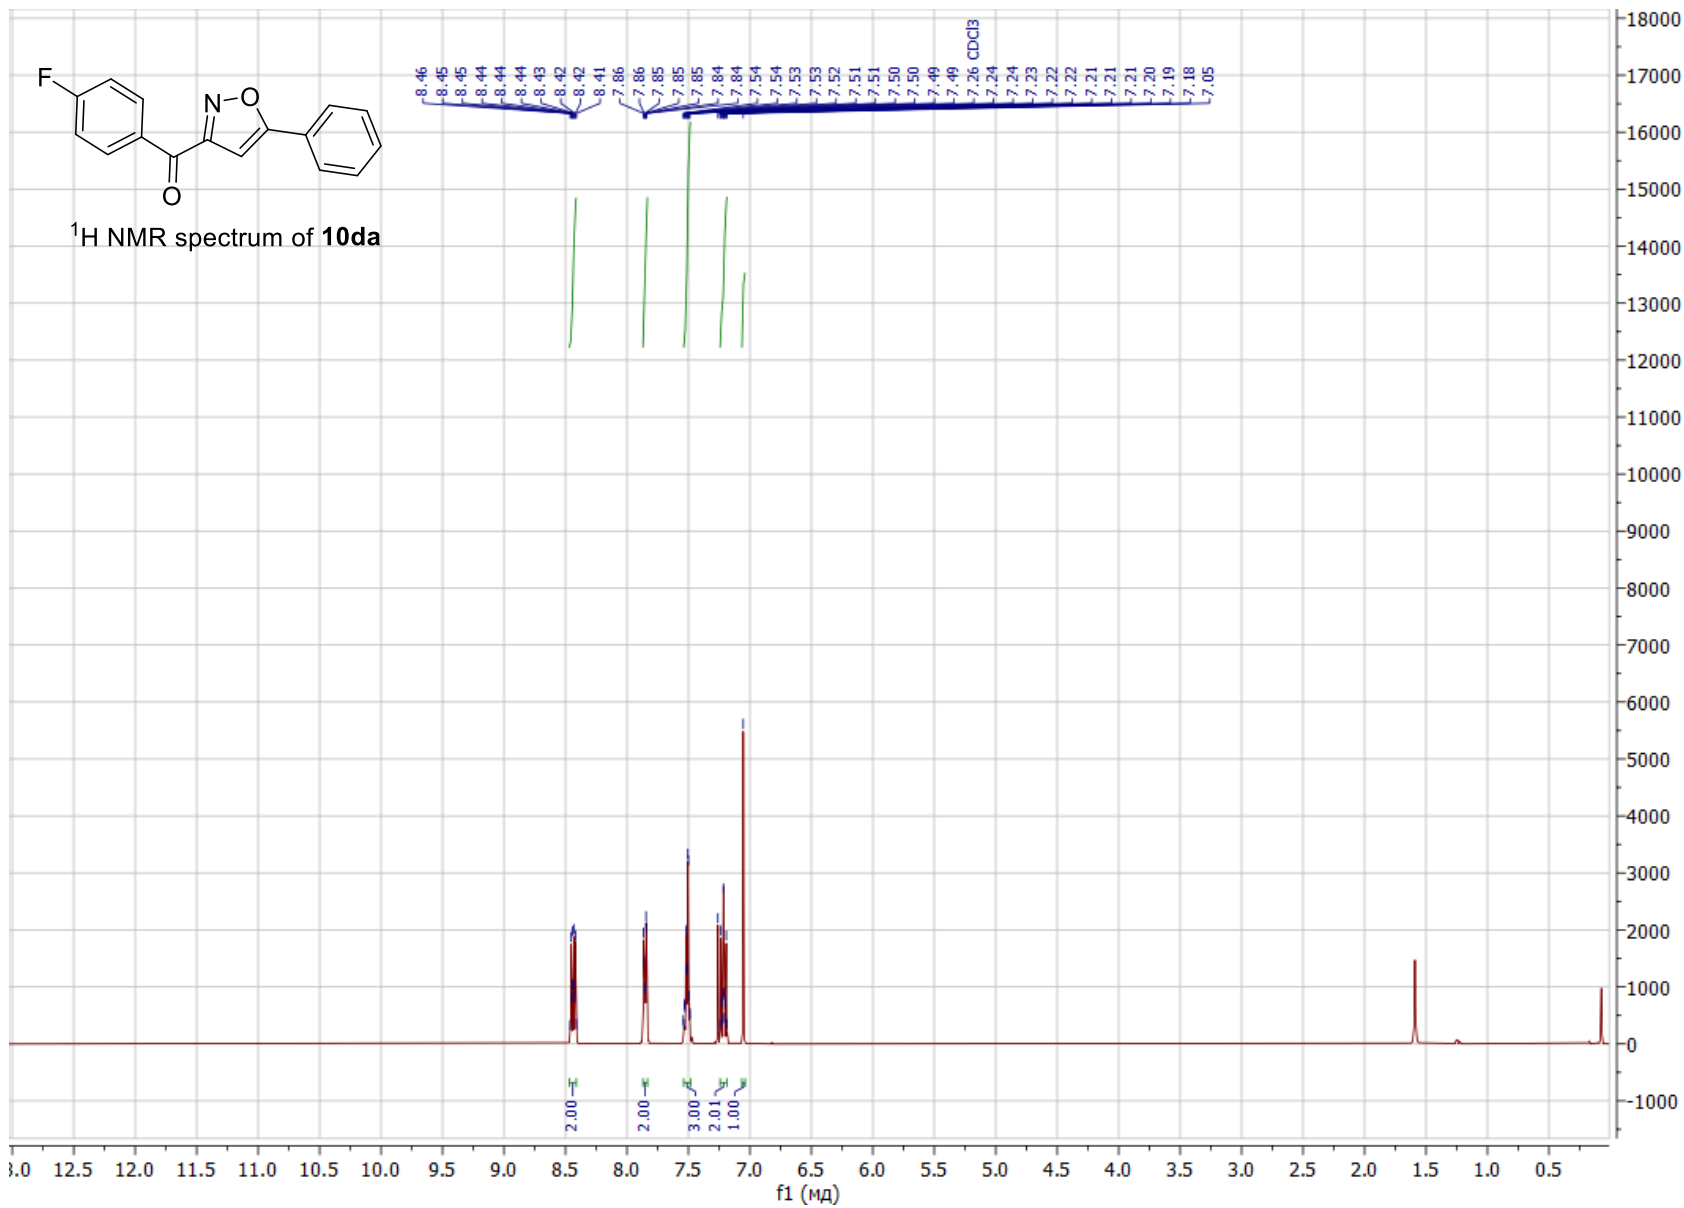

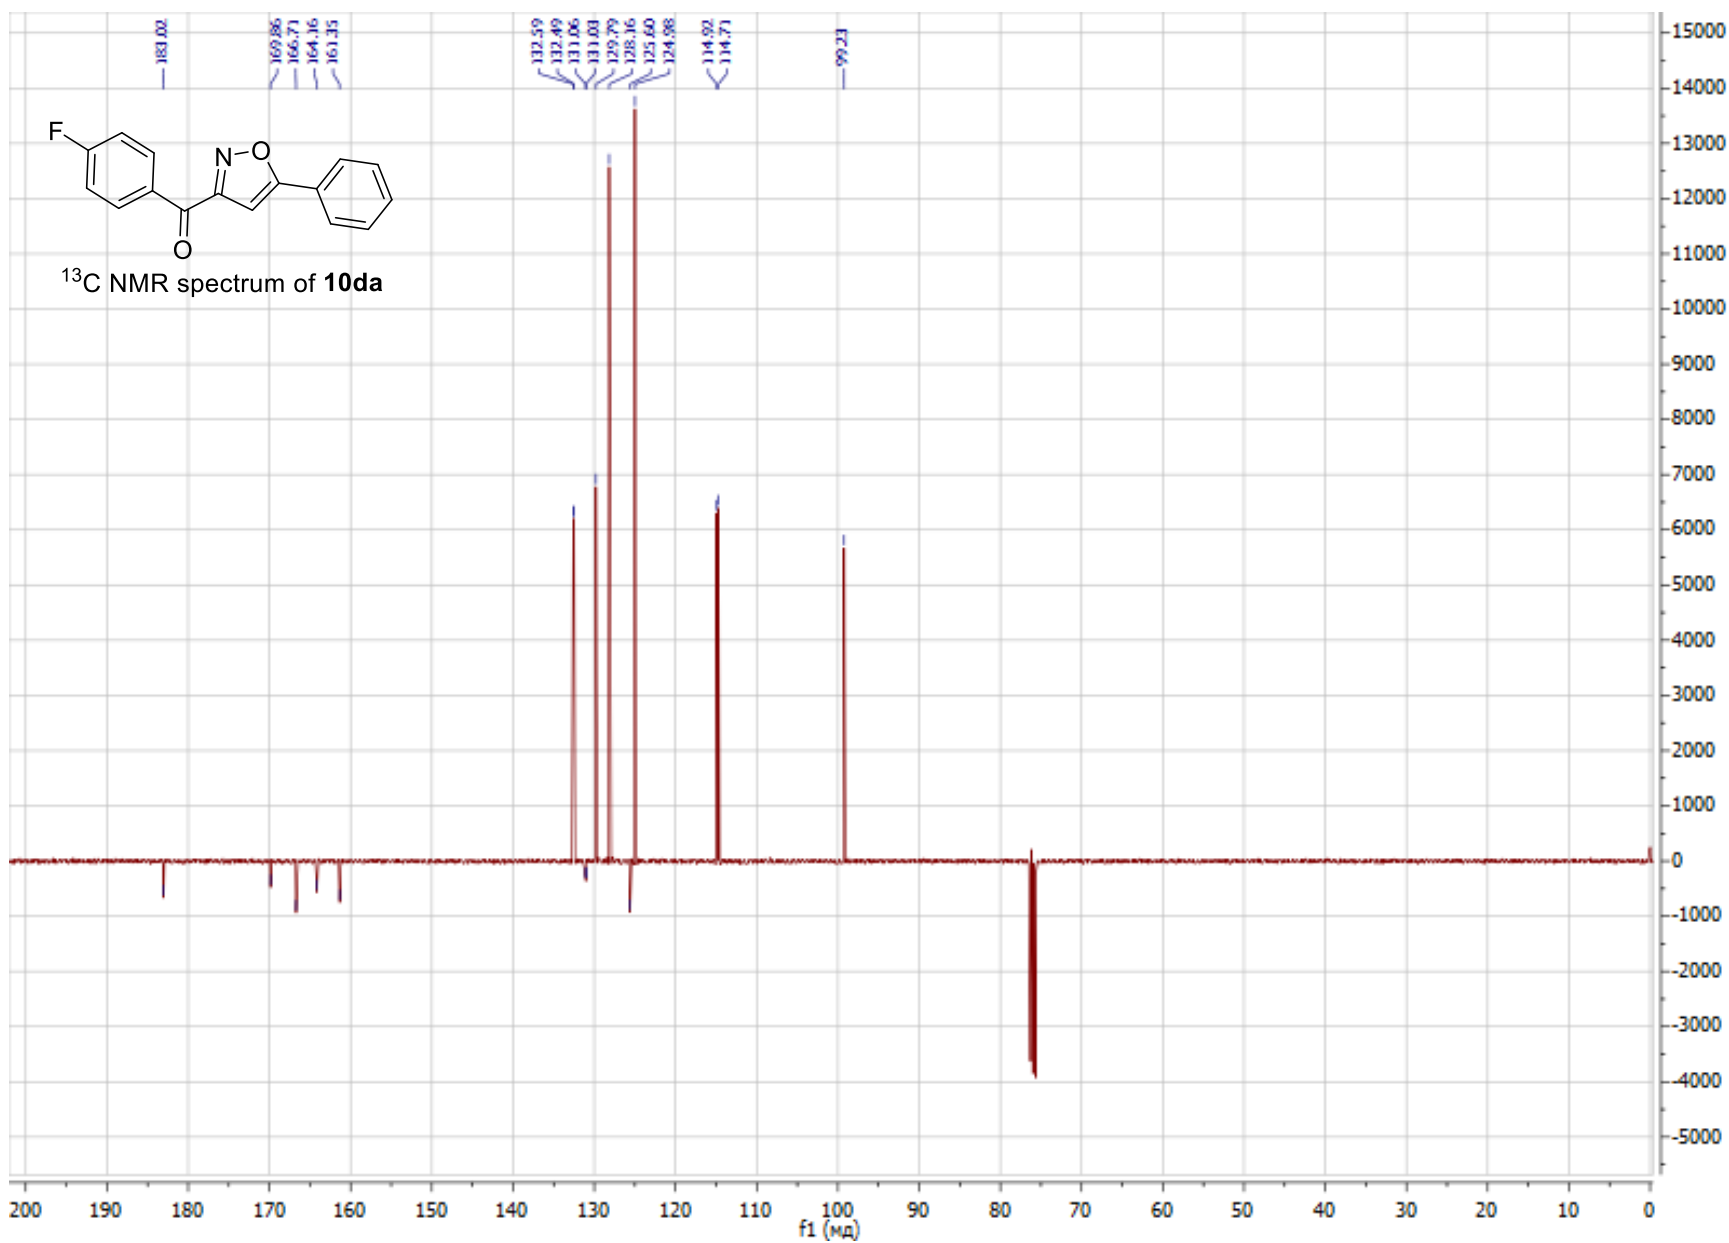

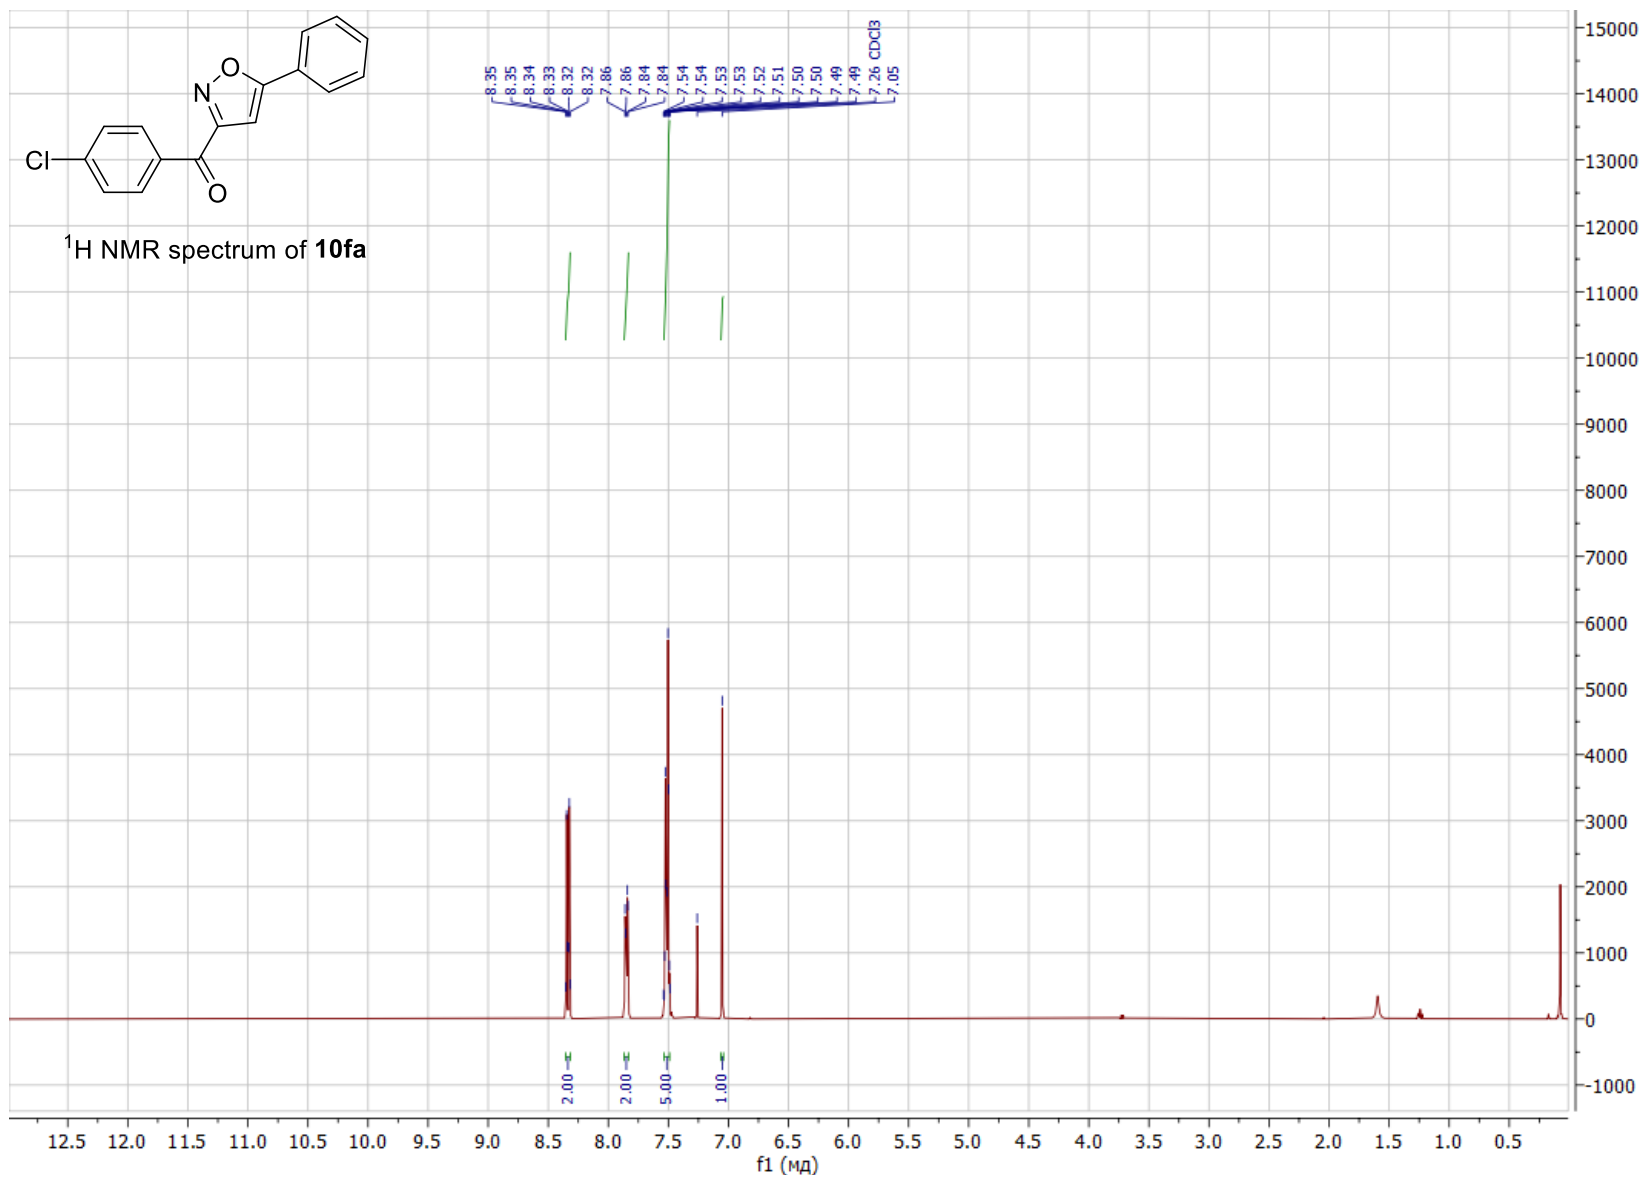



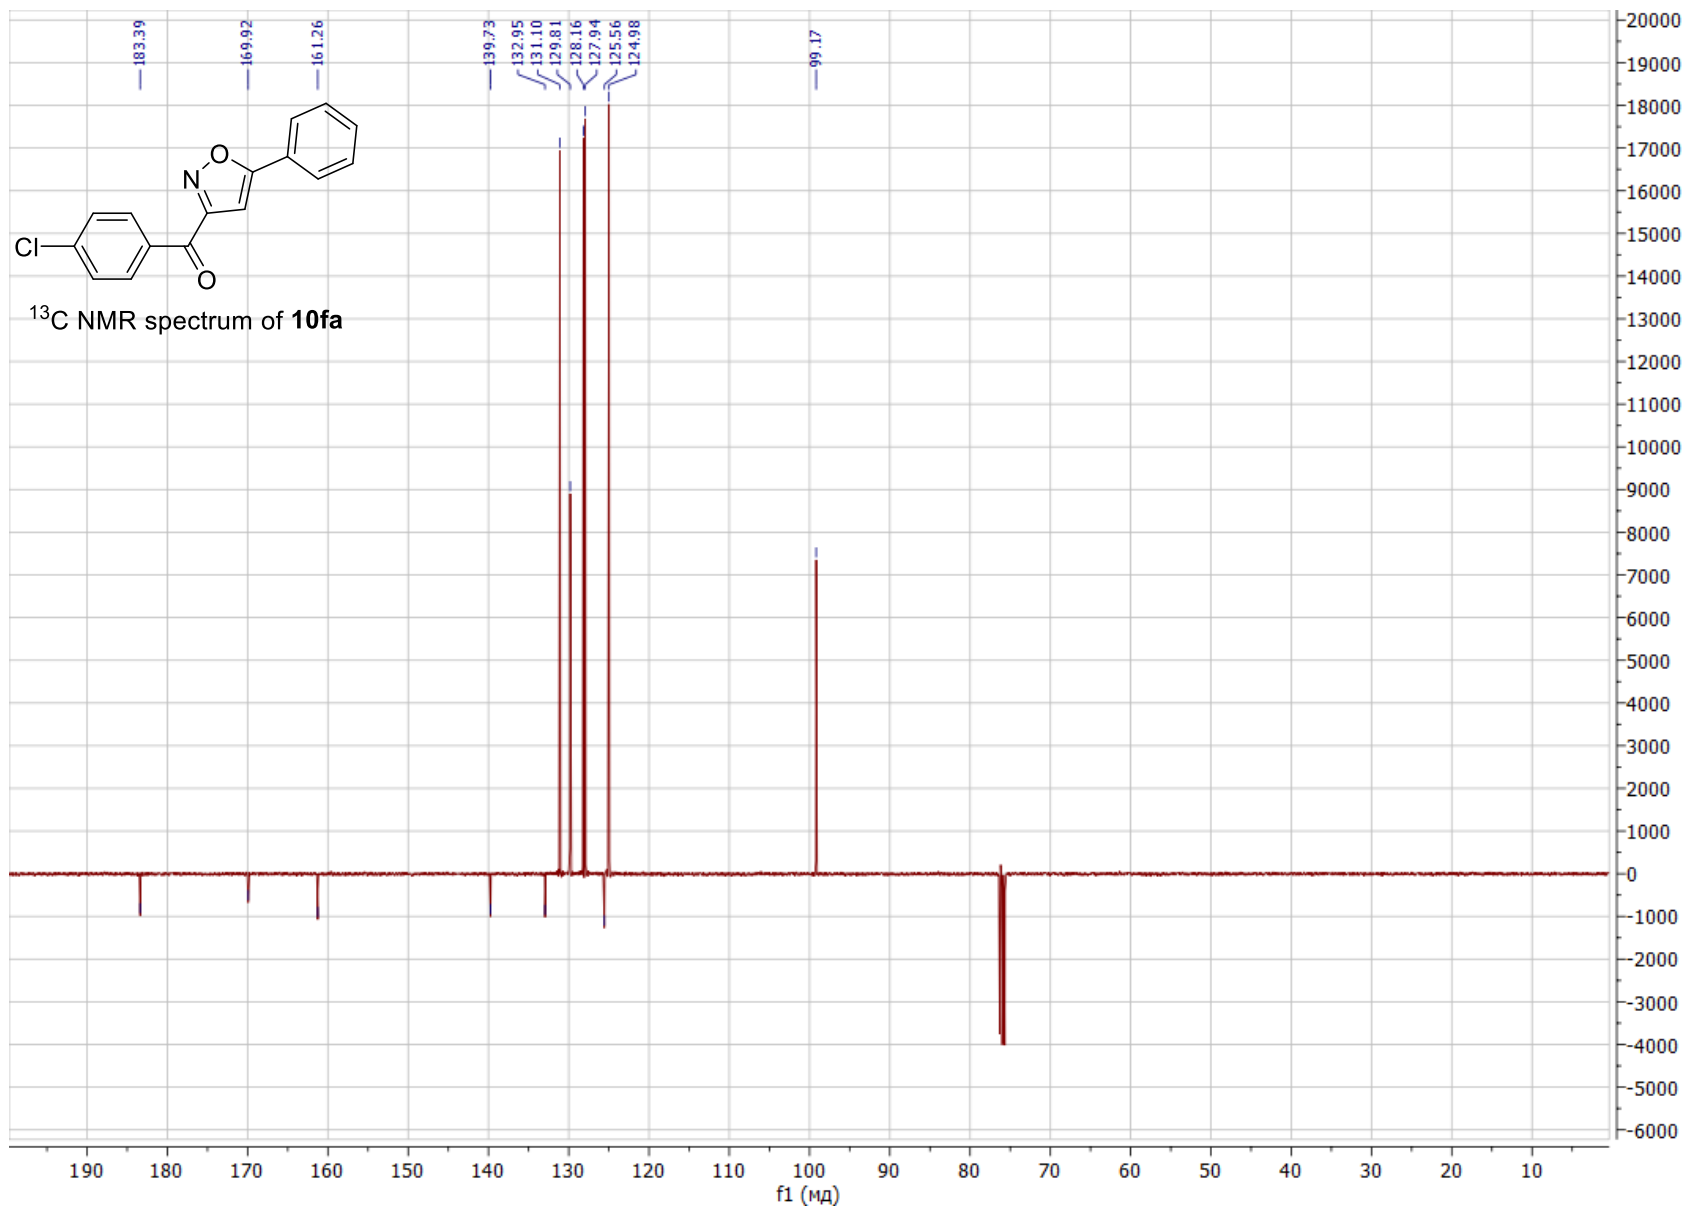

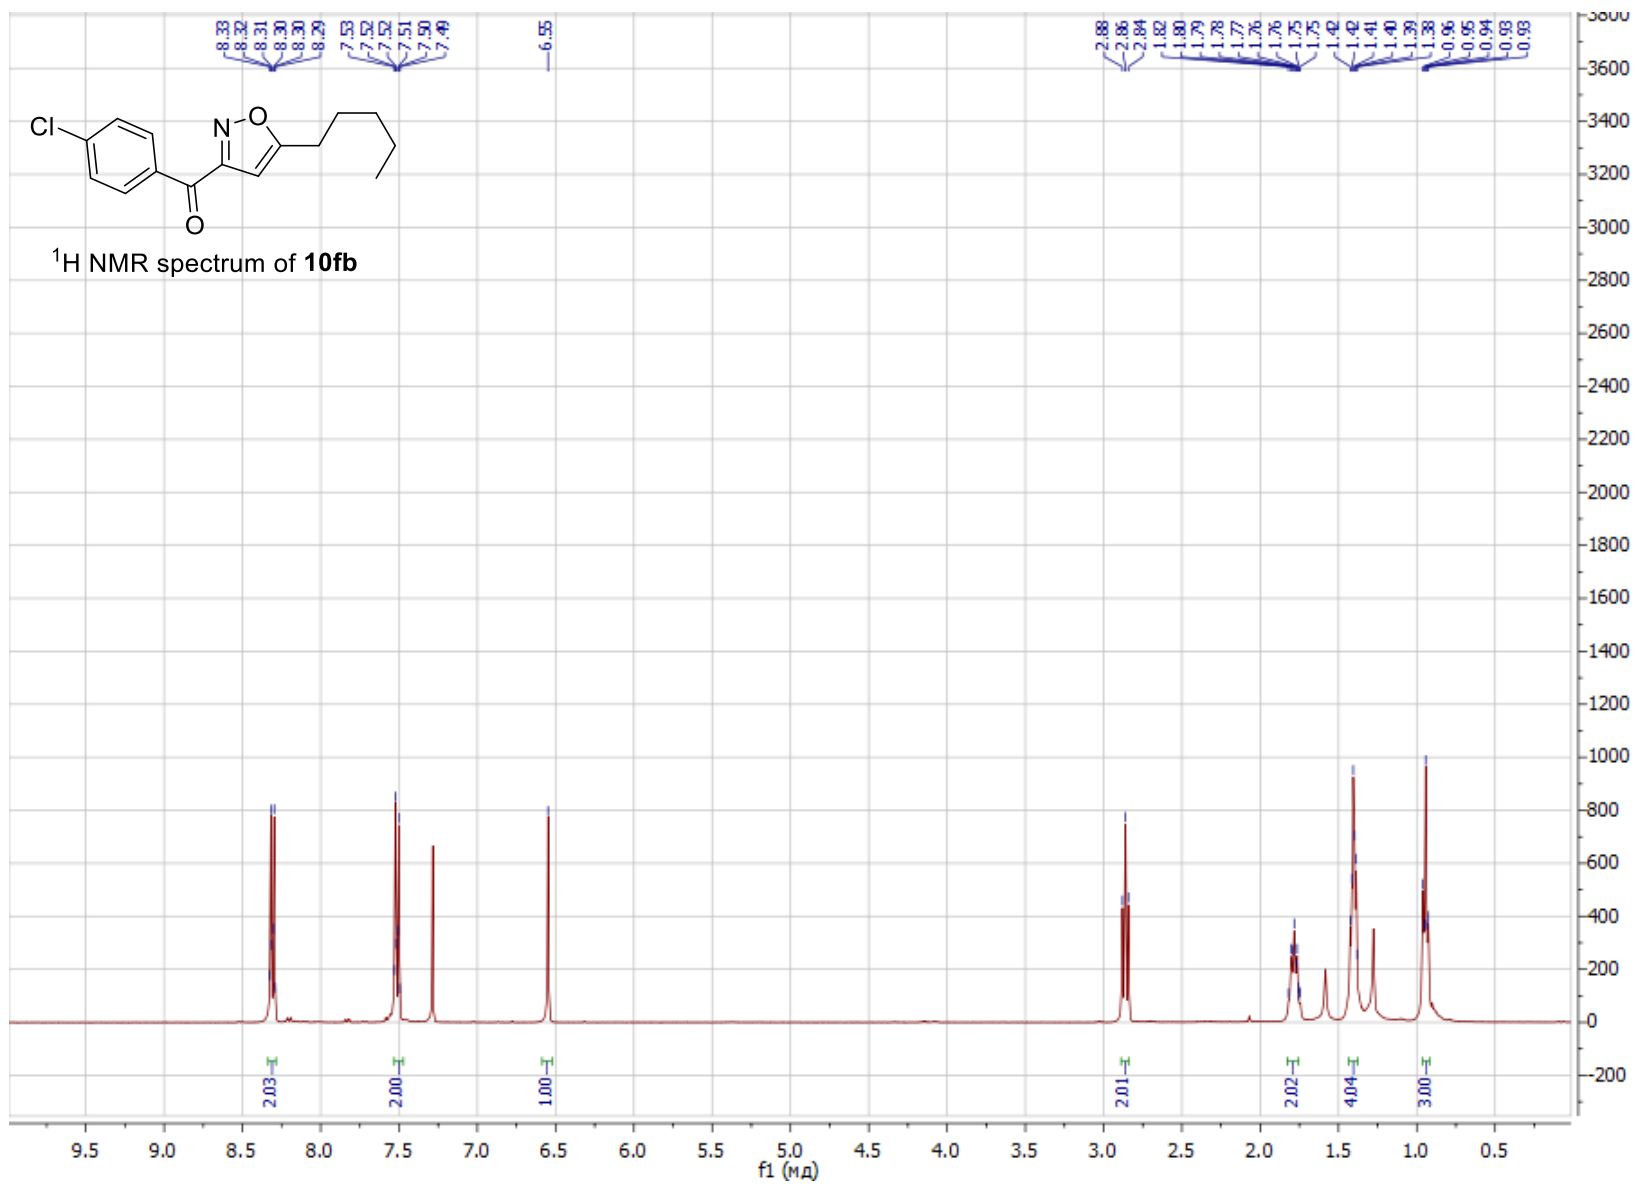

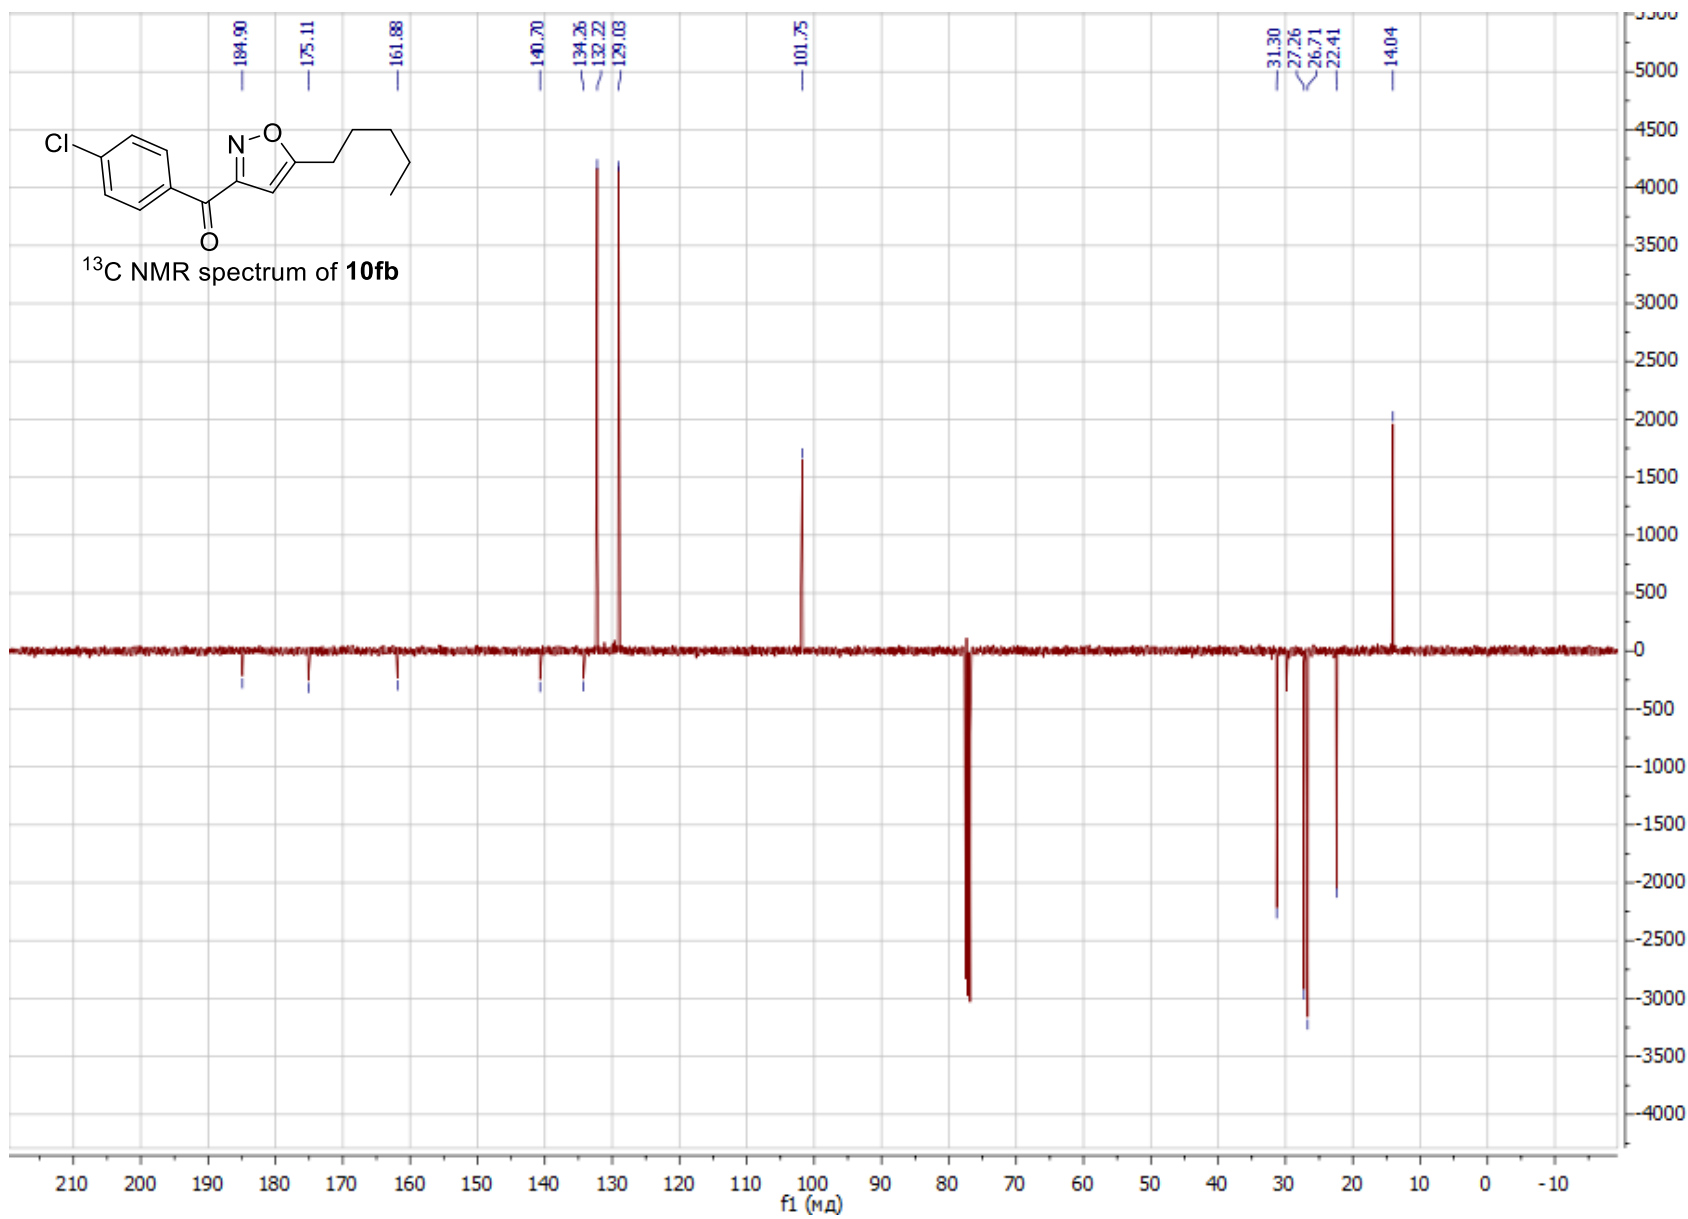

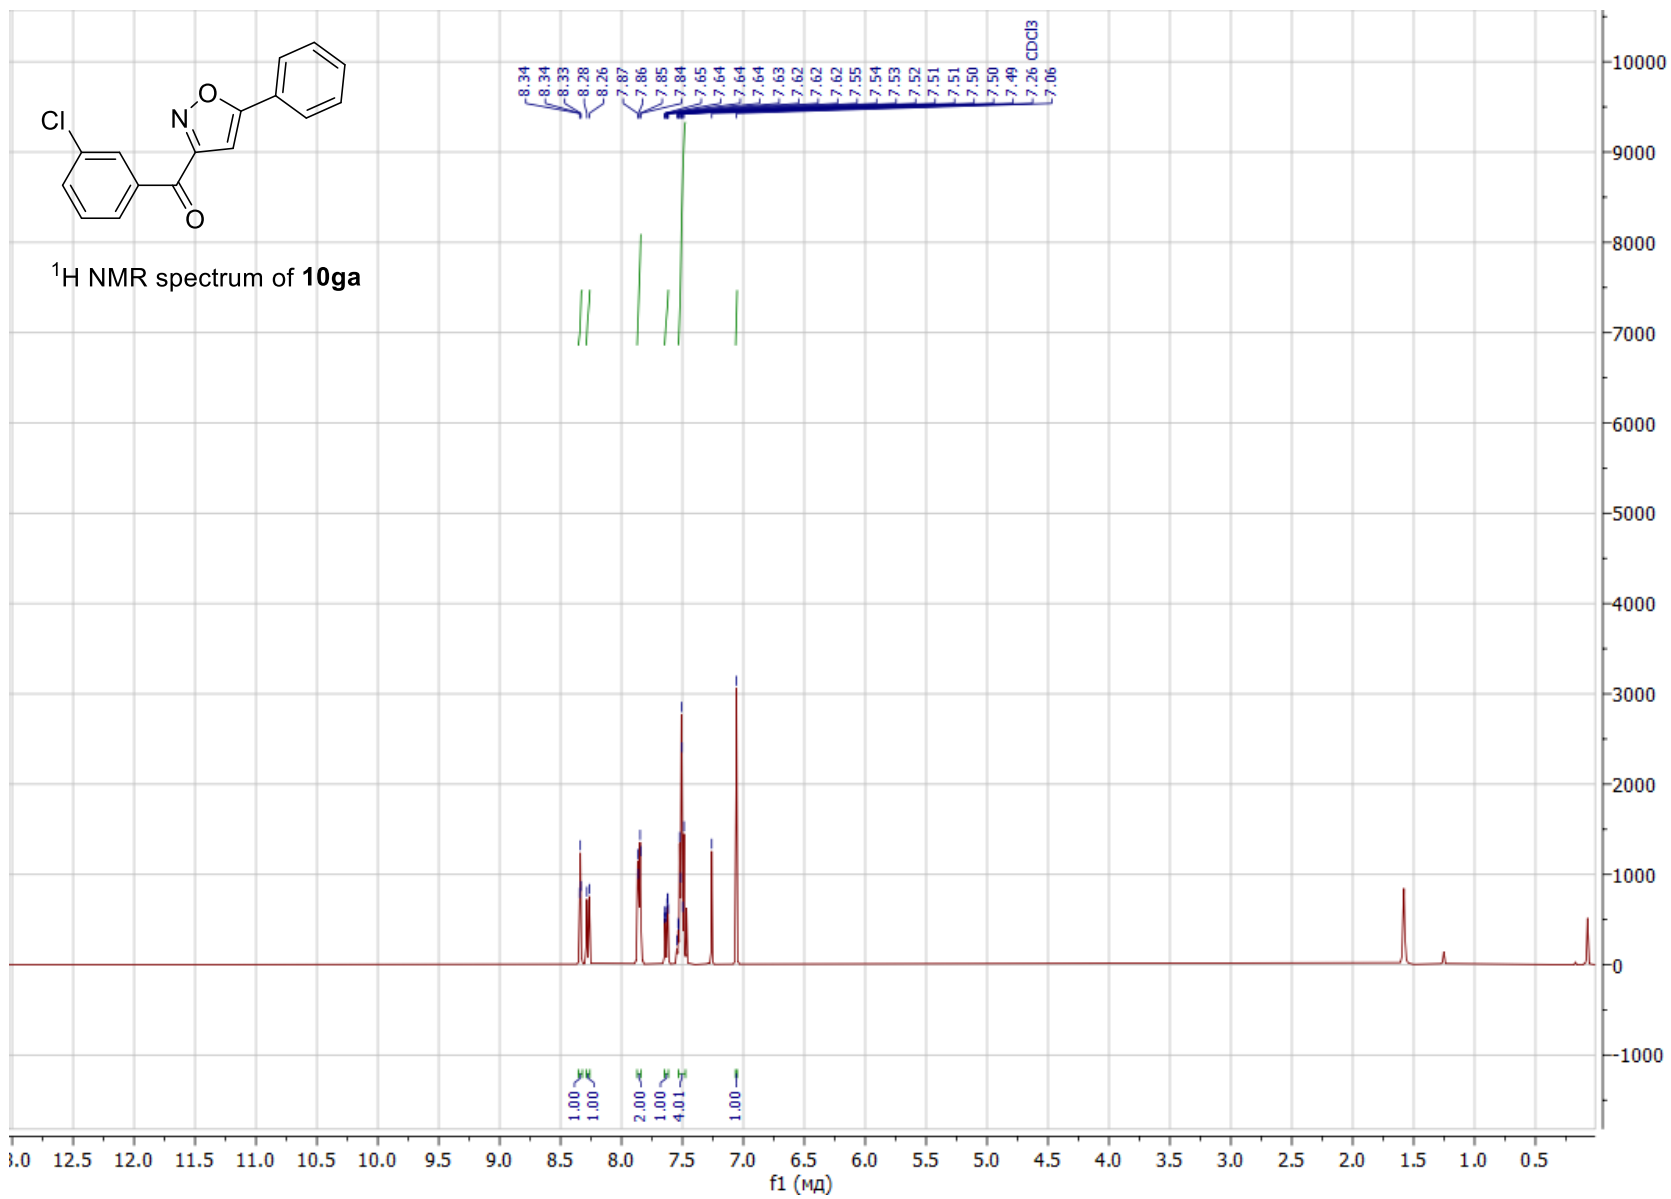

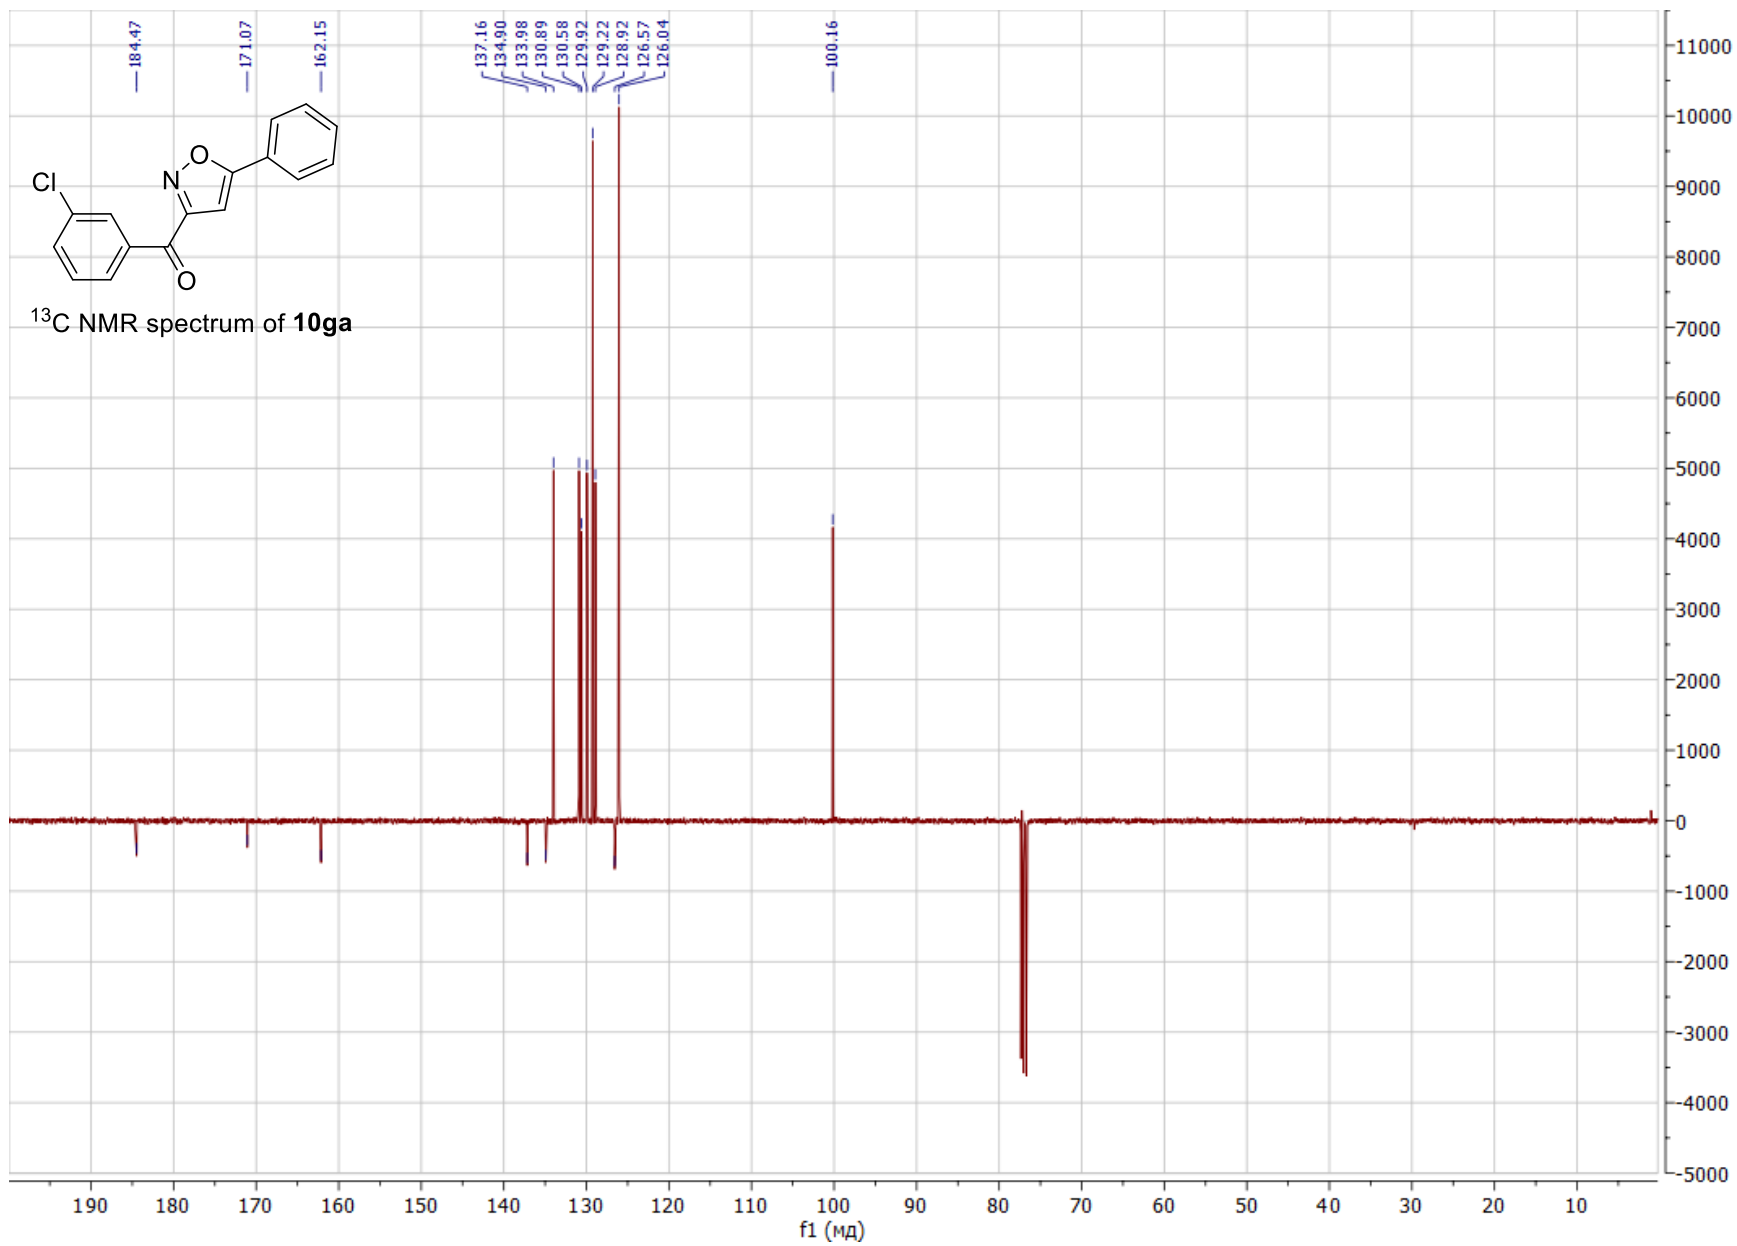

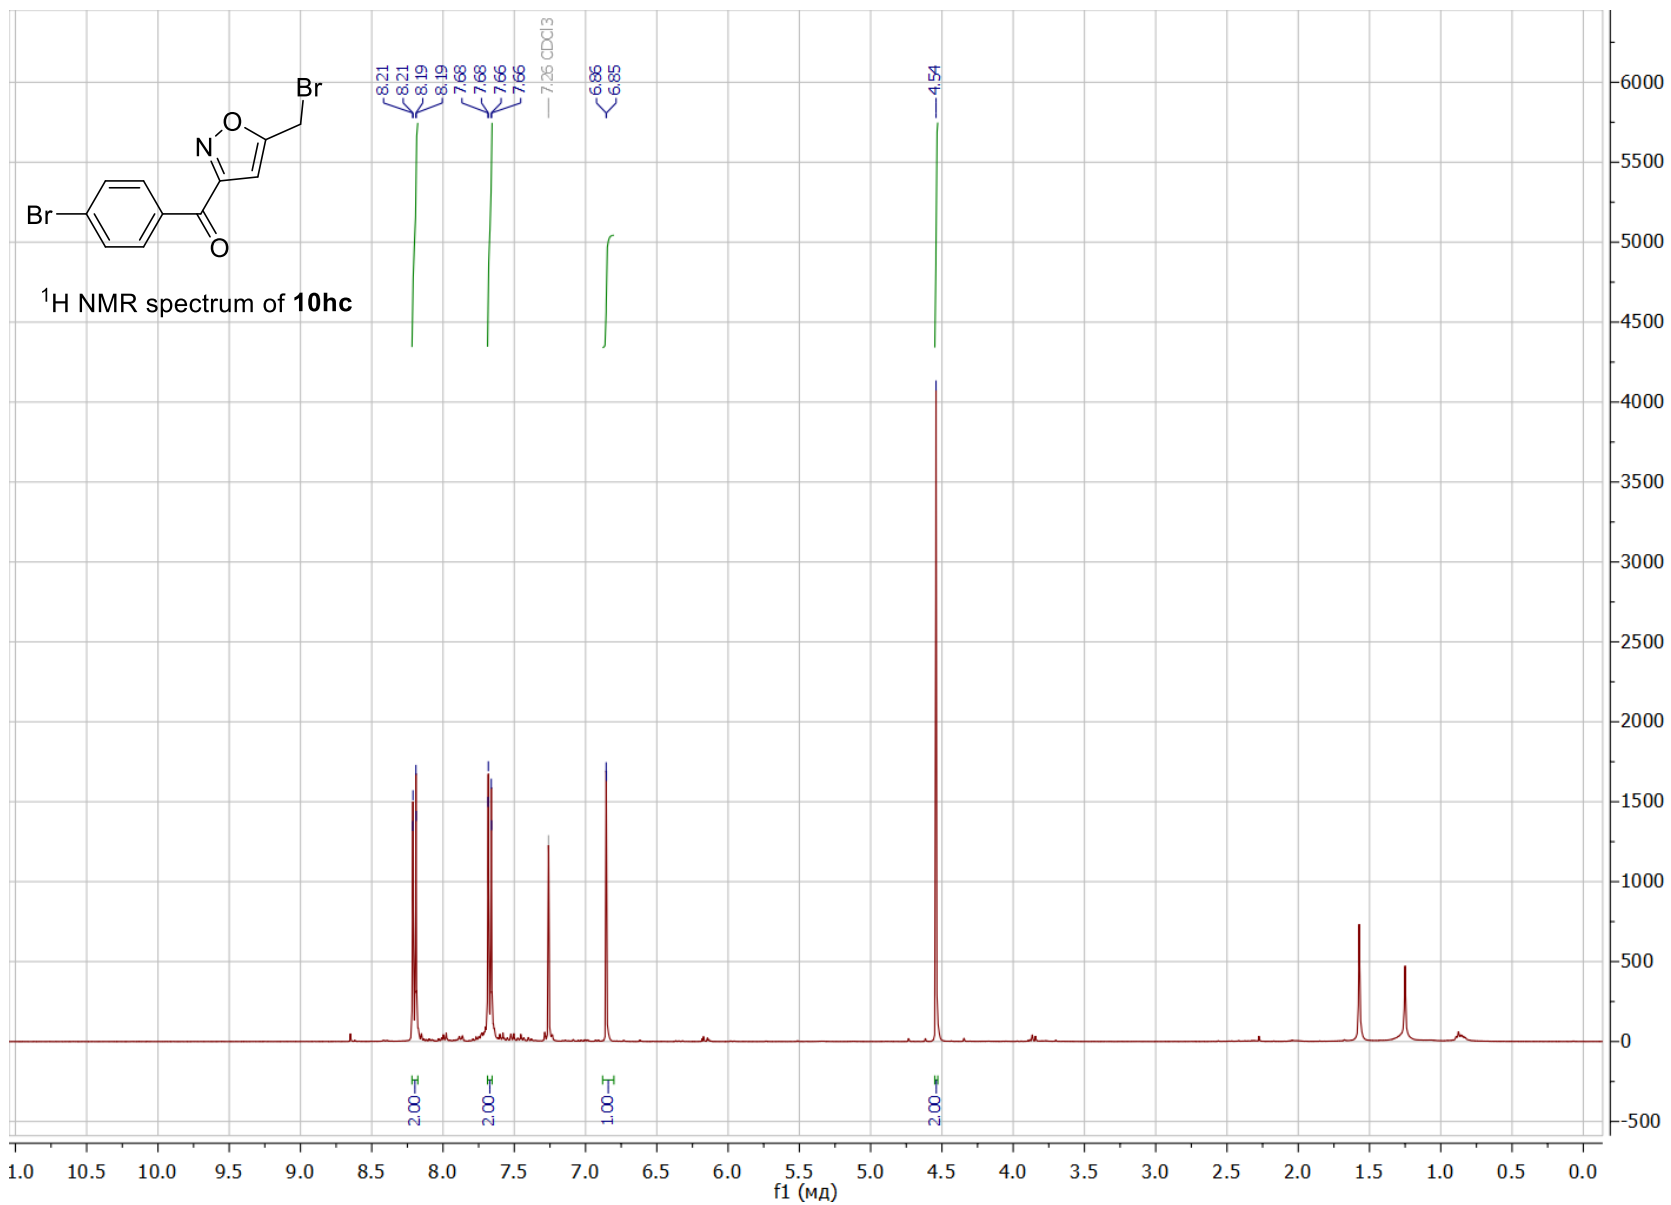

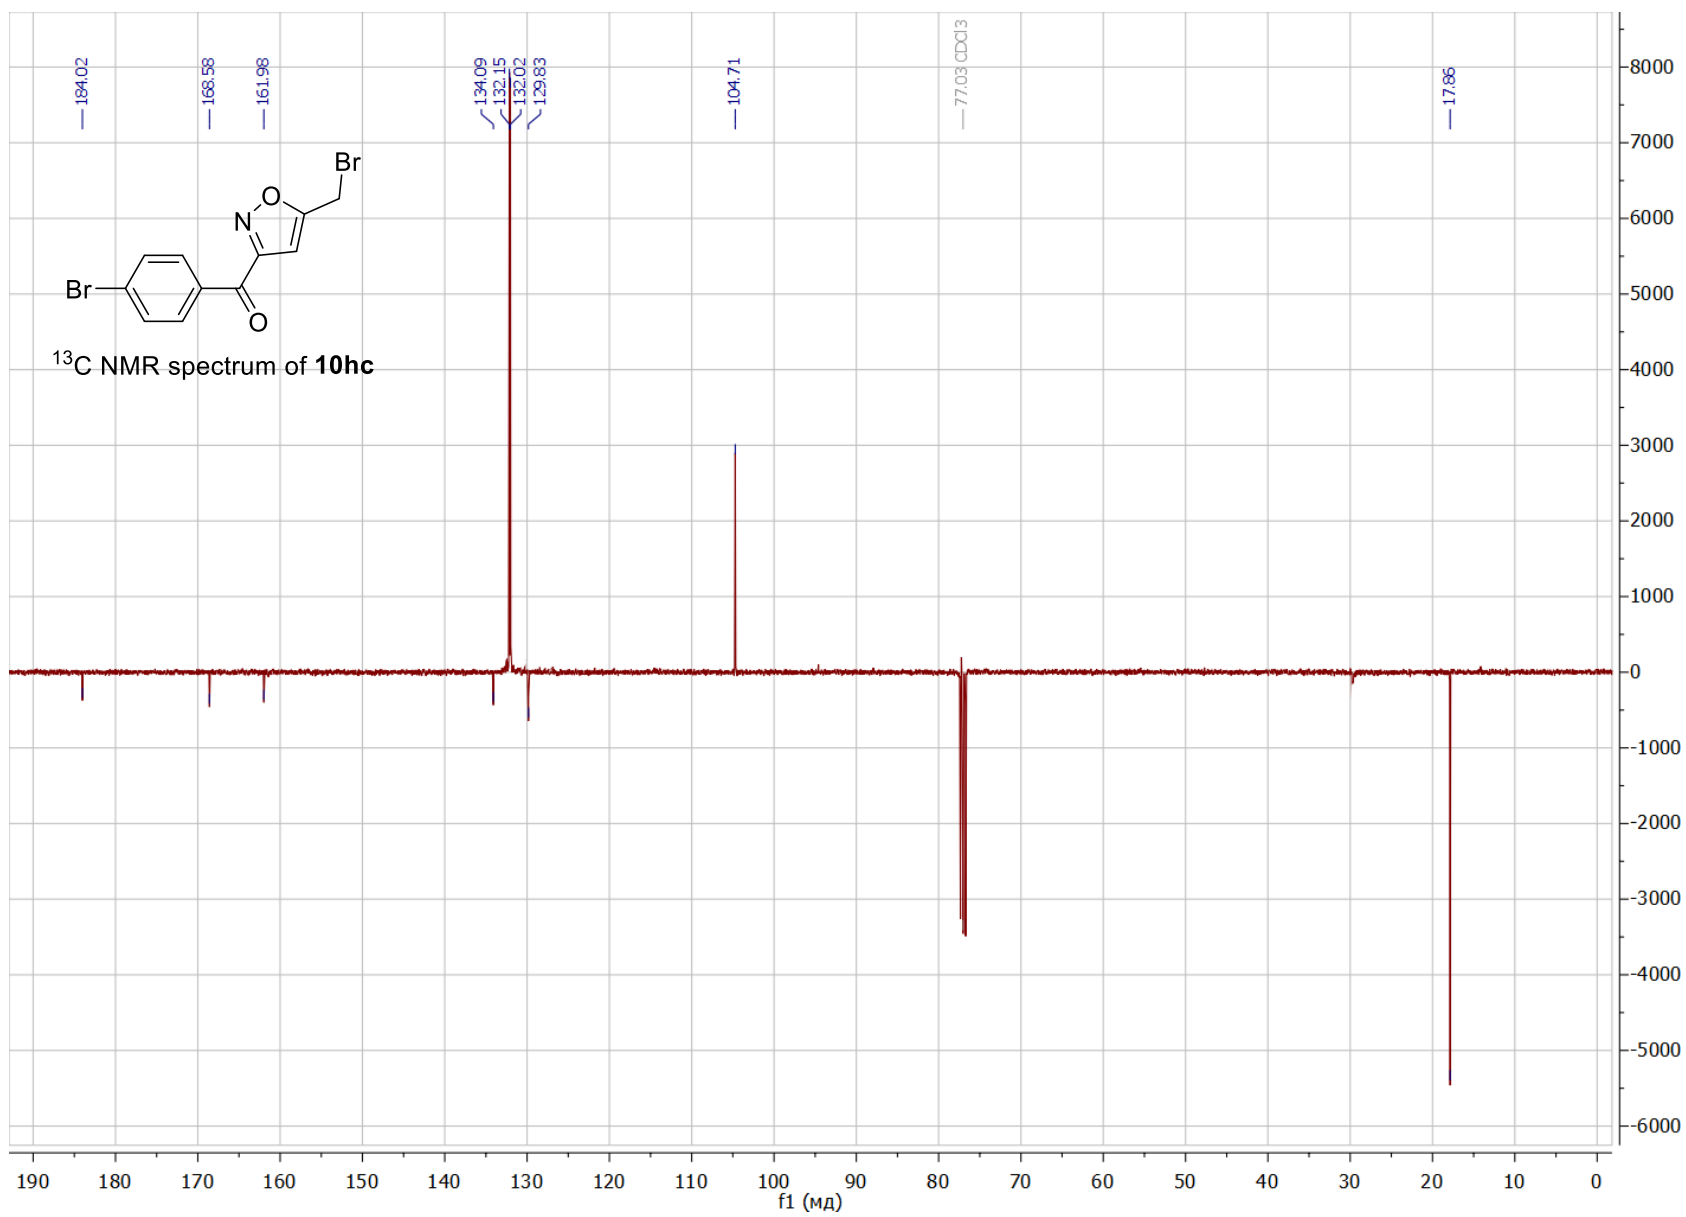

**<sup>1</sup>H and <sup>13</sup>C NMR spectral charts for 4,7-diphenyl-[1,2,5]oxadiazolo[3,4-d]pyridazine 1-oxide (13a):**

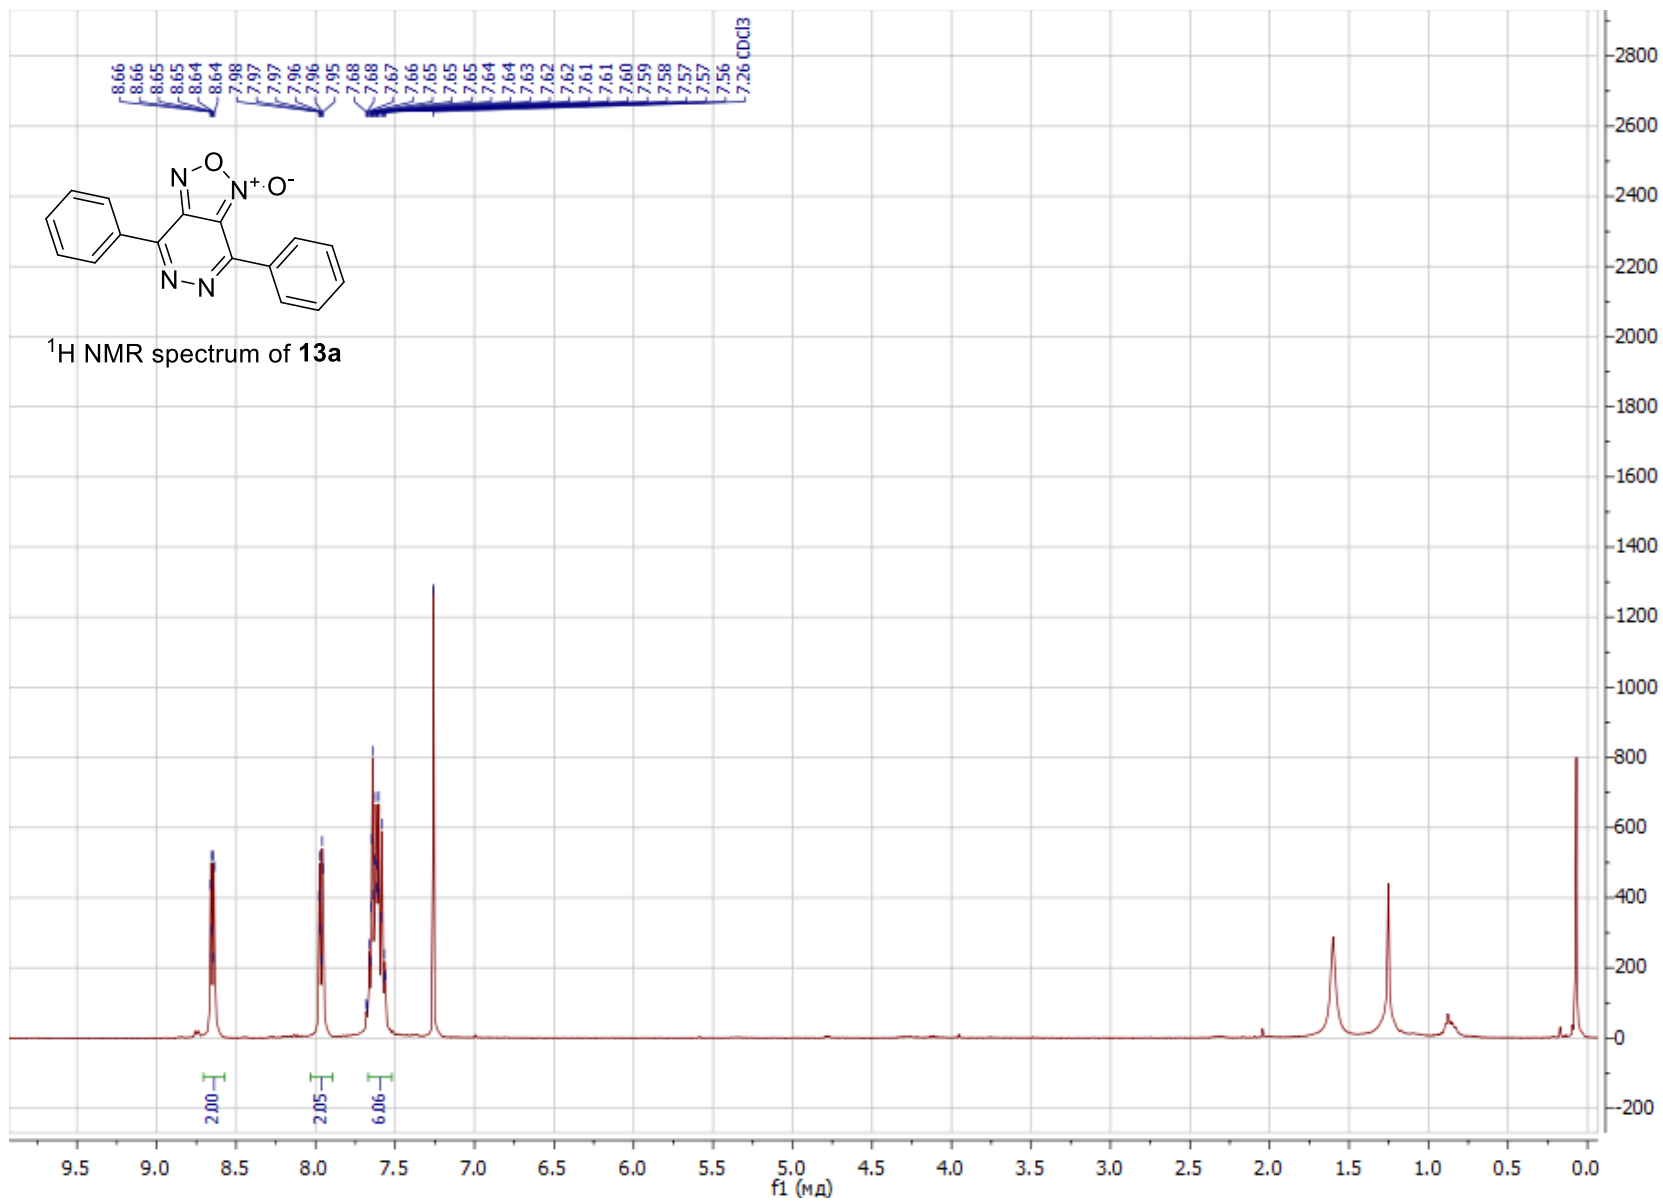



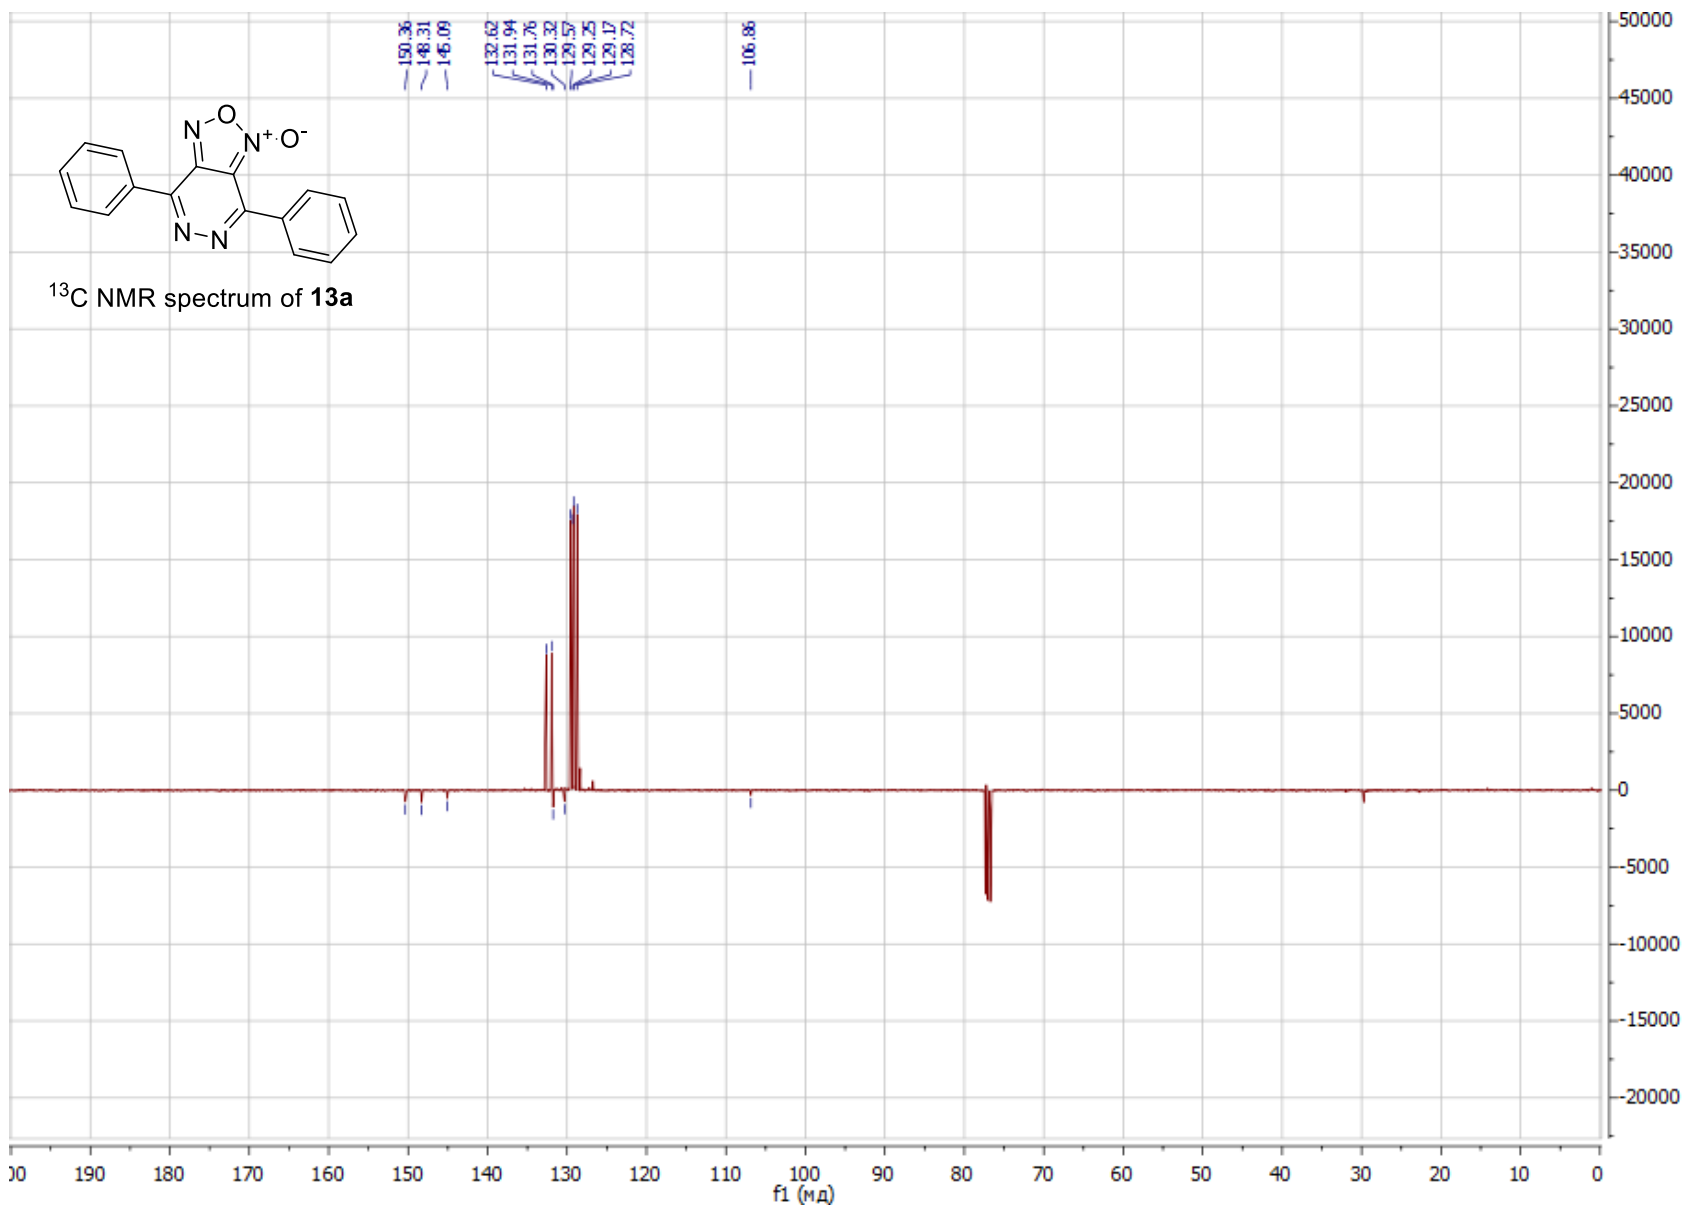

**<sup>1</sup>H and <sup>13</sup>C NMR spectral charts for cycloadducts with chalcones 12aa, 14aa, 15fb:**

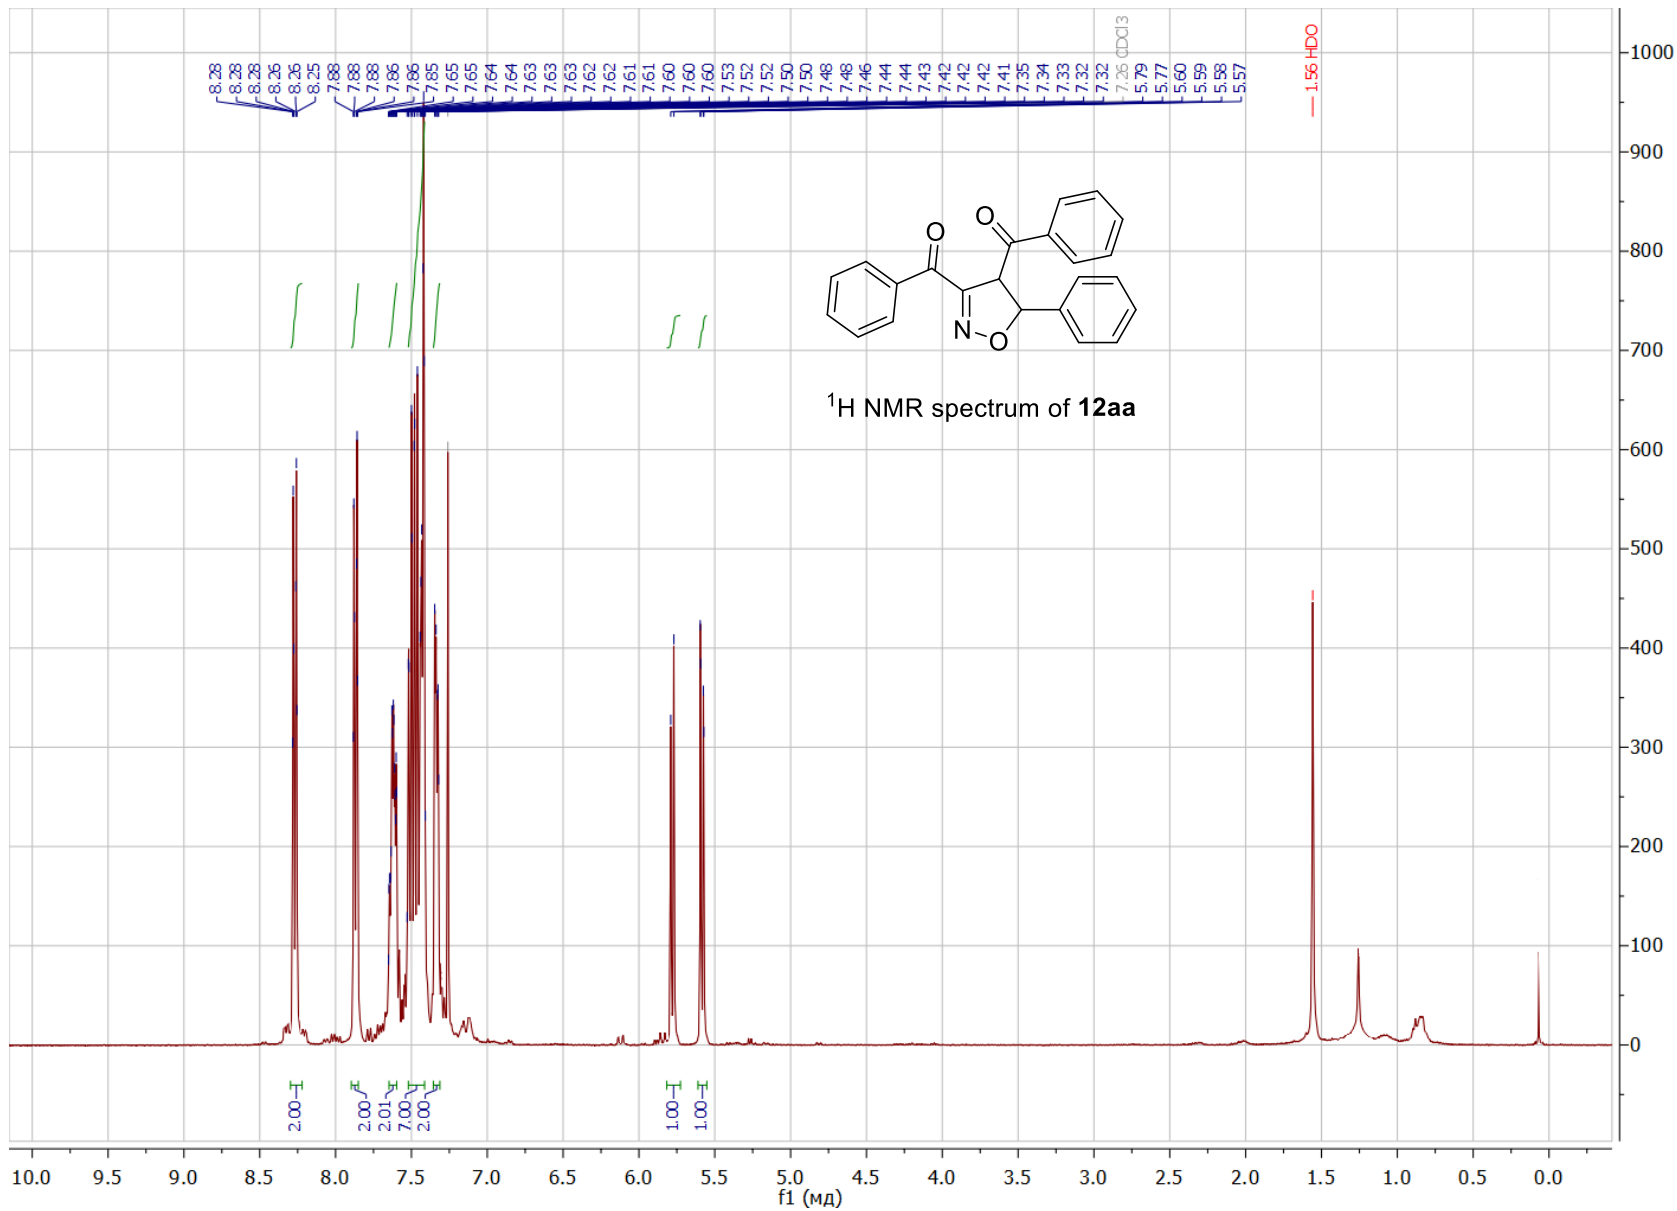

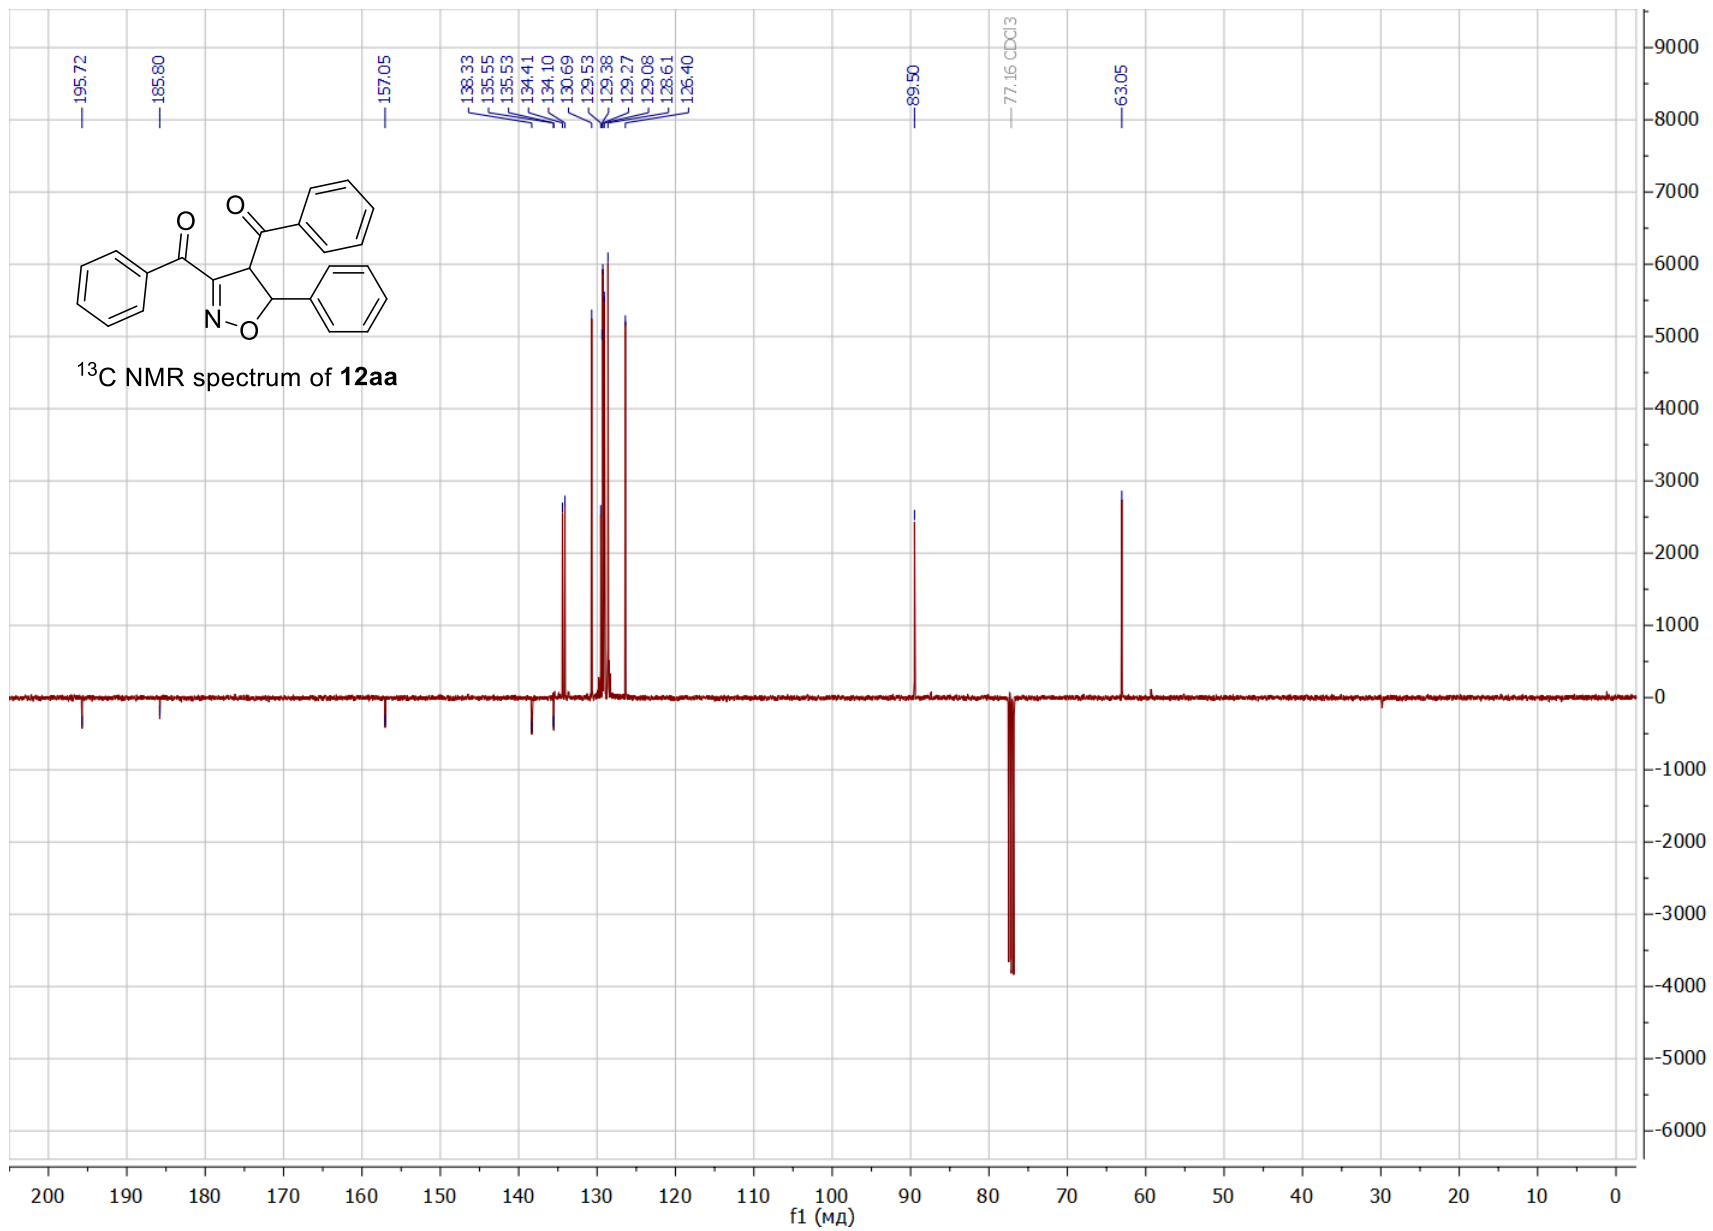

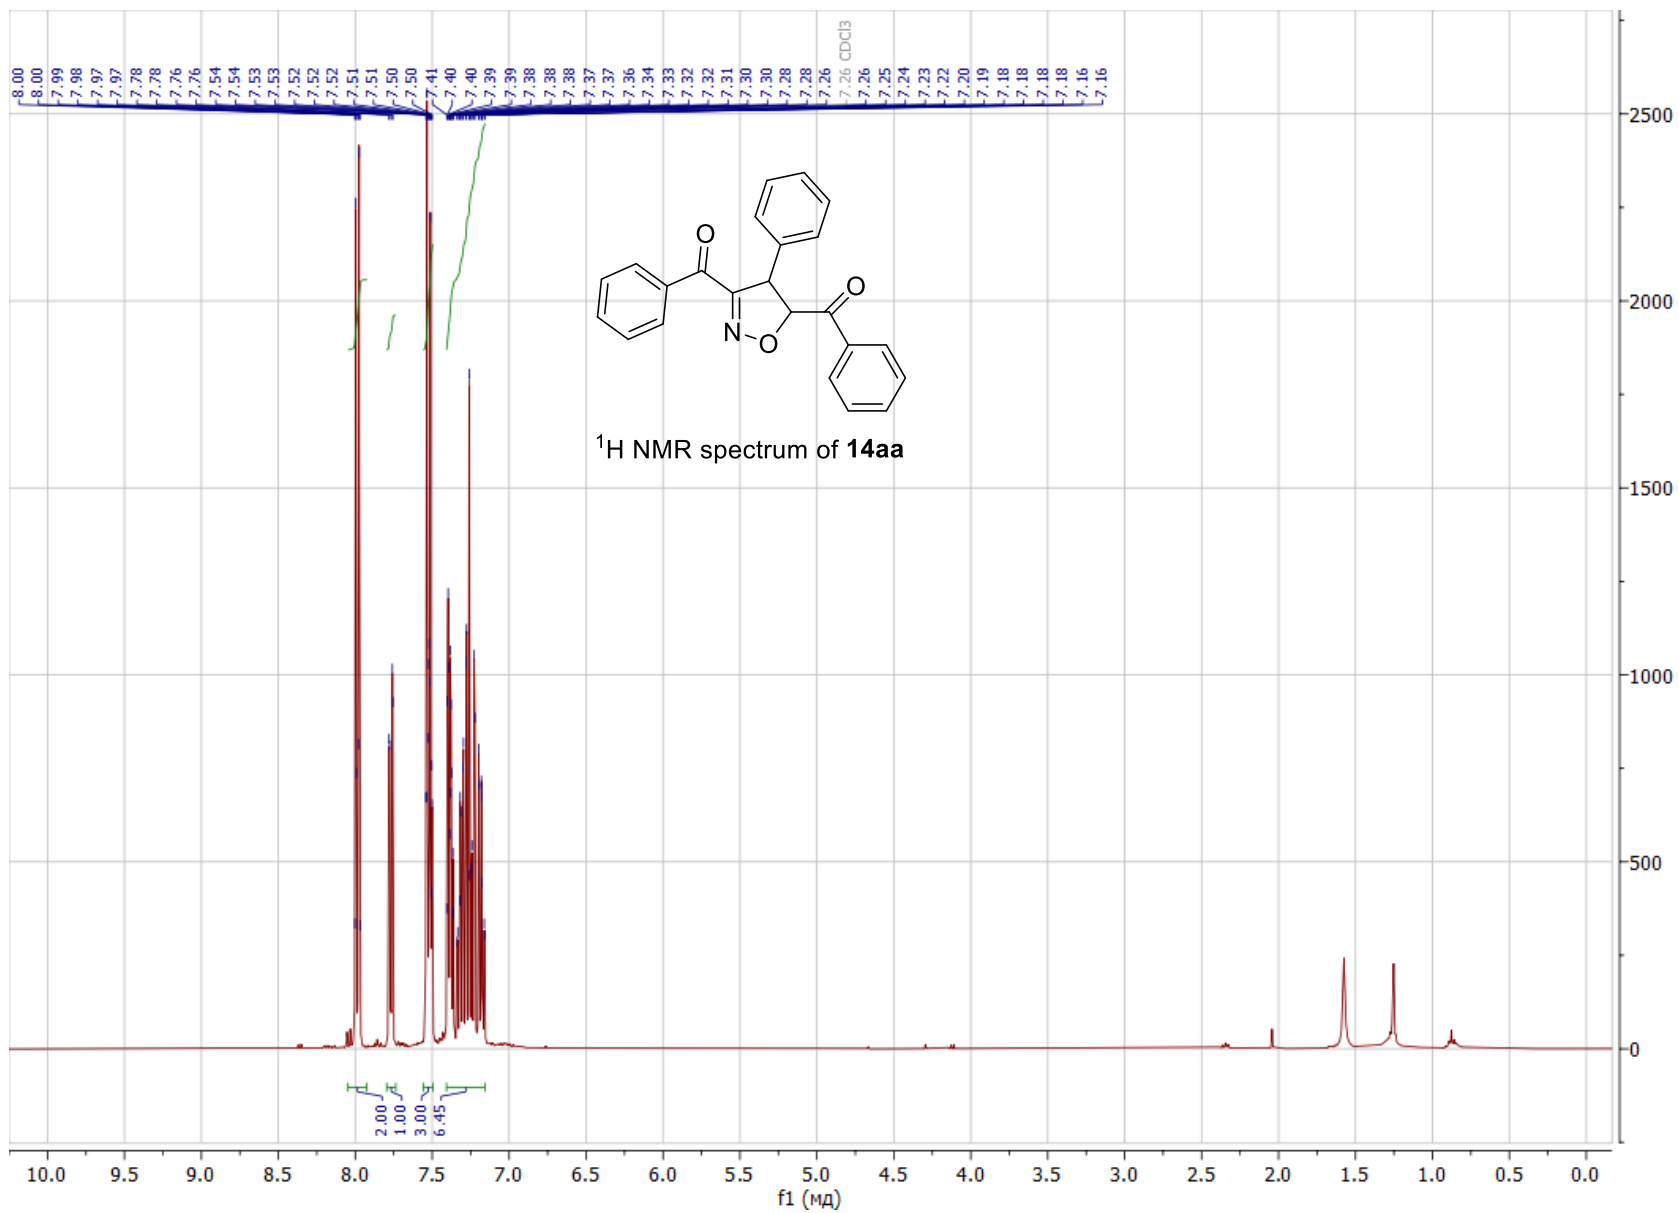

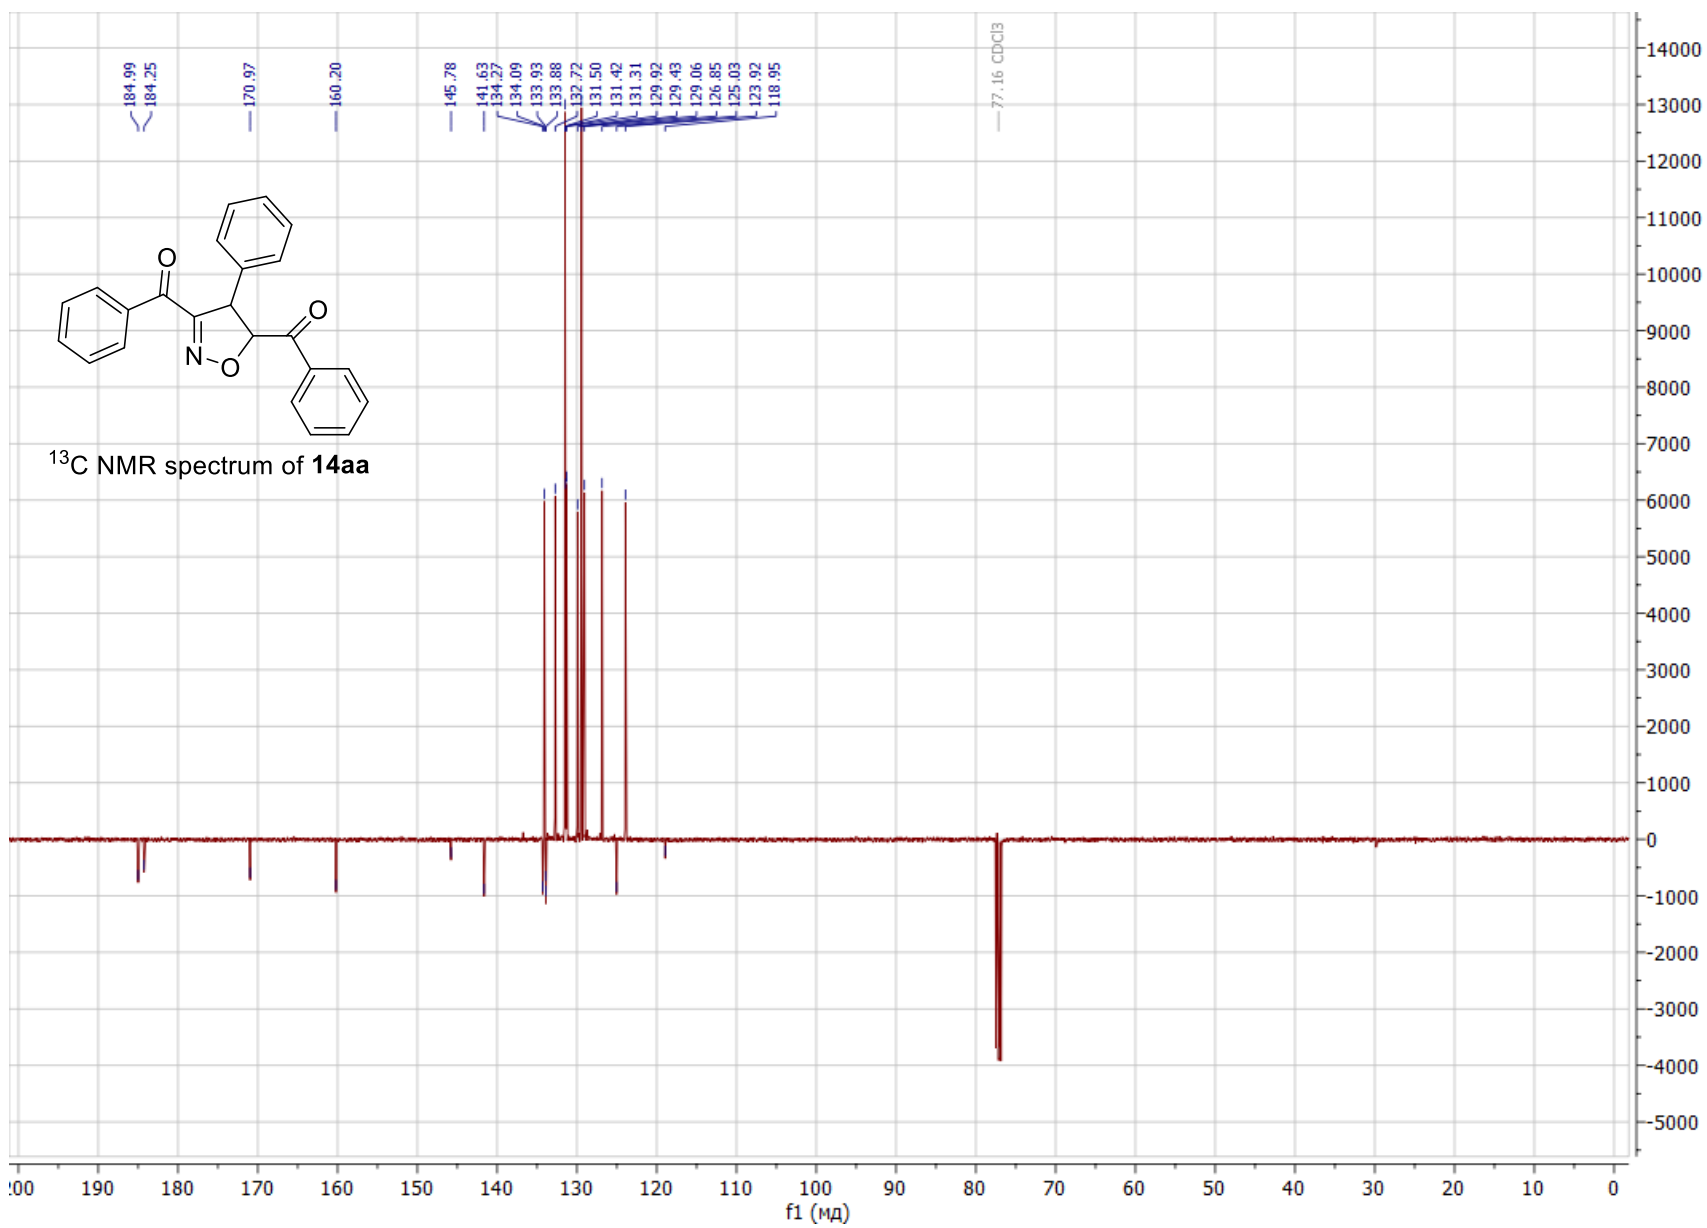

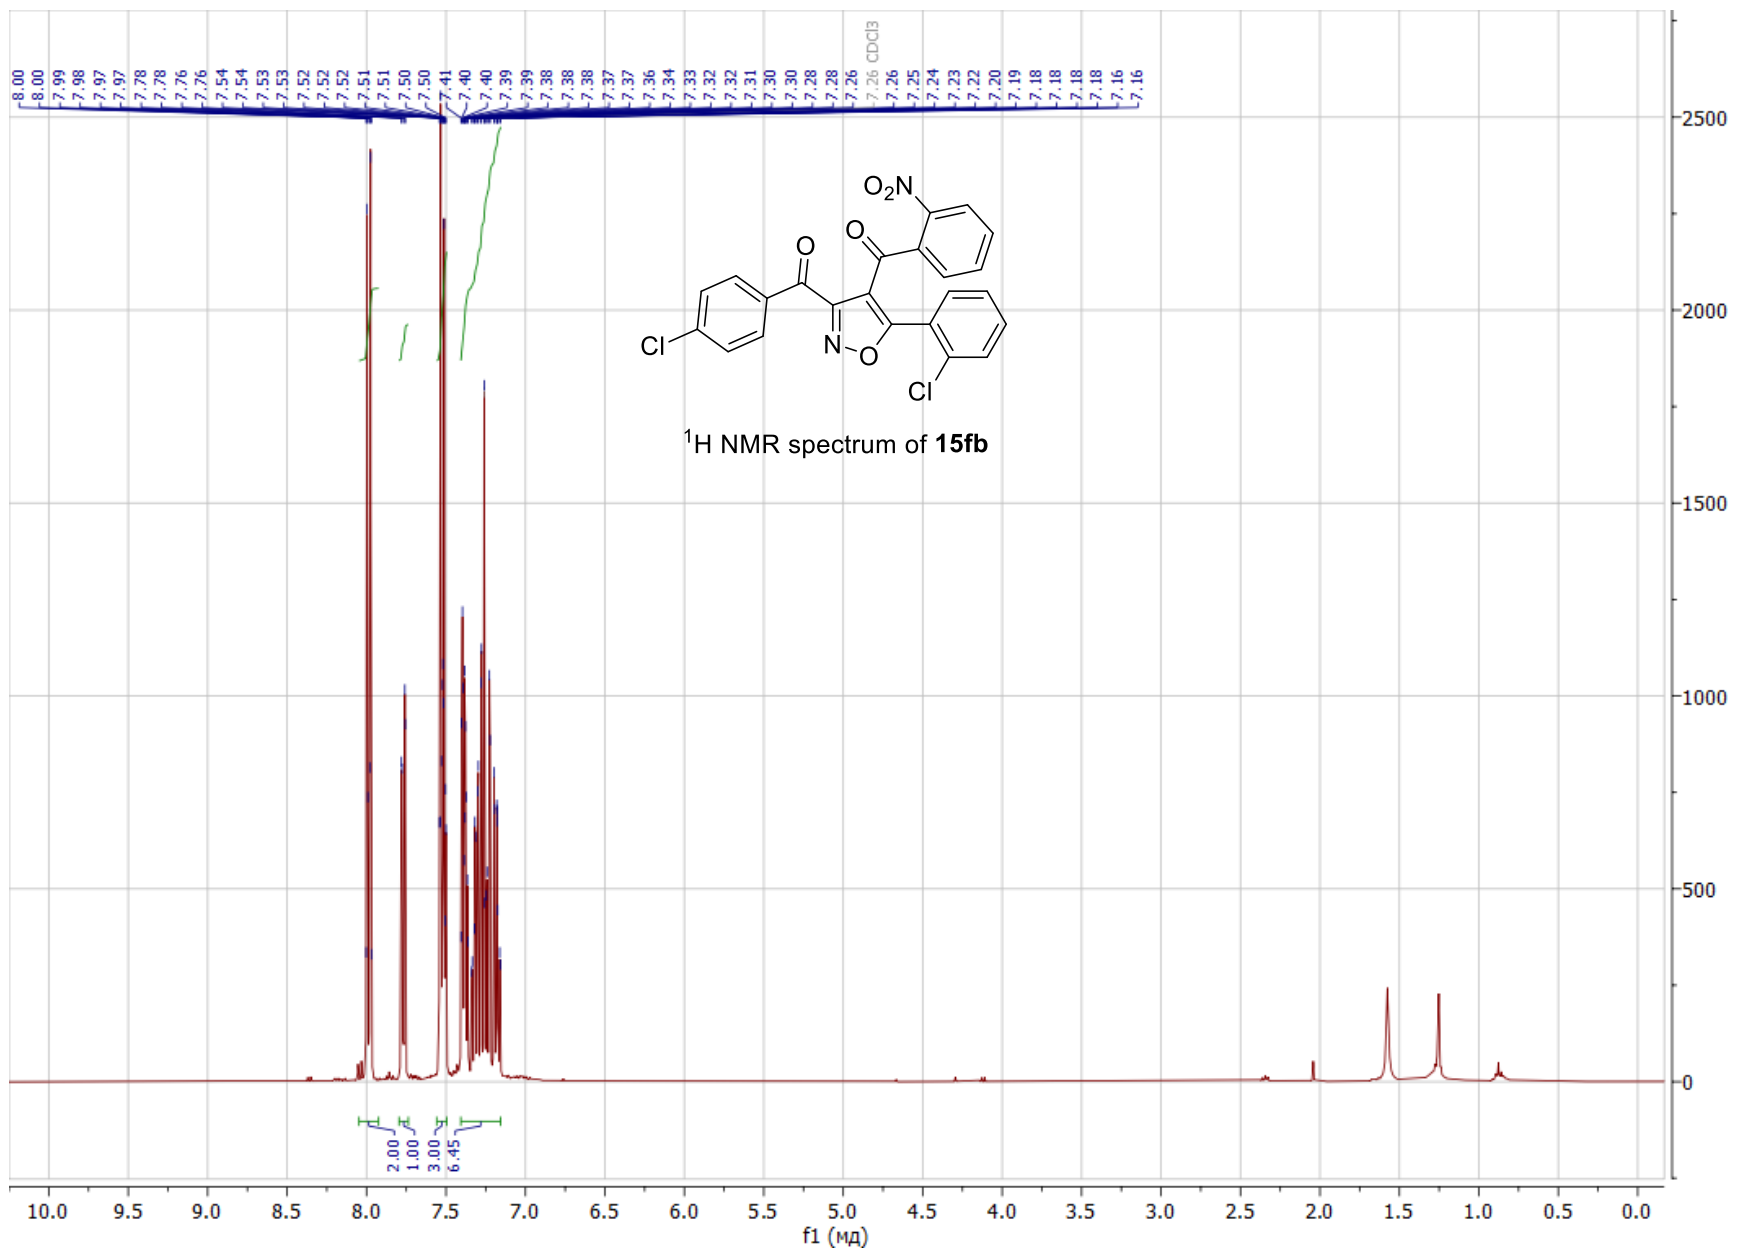

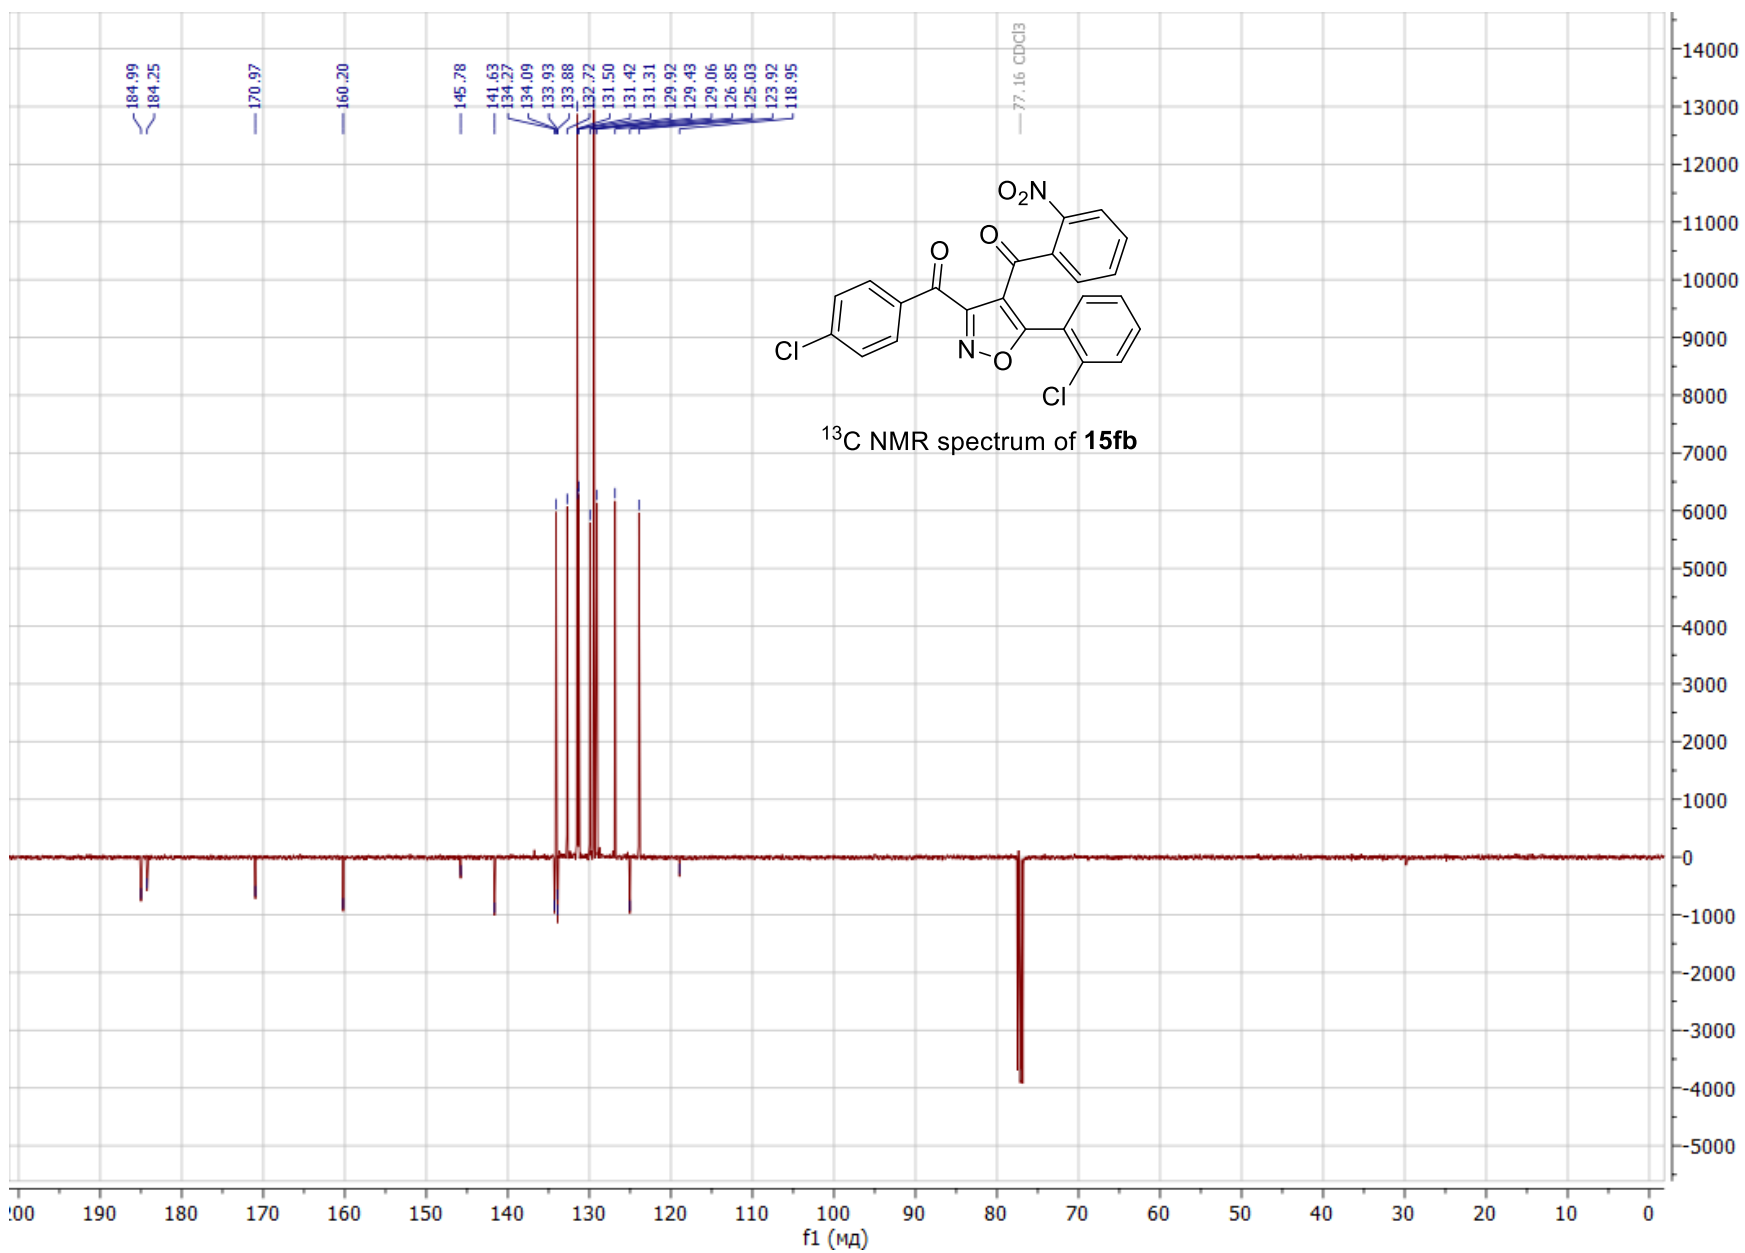

**<sup>1</sup>H and <sup>13</sup>C NMR spectral charts for 3-Benzoyl-5-phenyl-3a,6a-dihydro-4H-pyrrolo[3,4-d]isoxazole-4,6(5H)-dione (17a):**

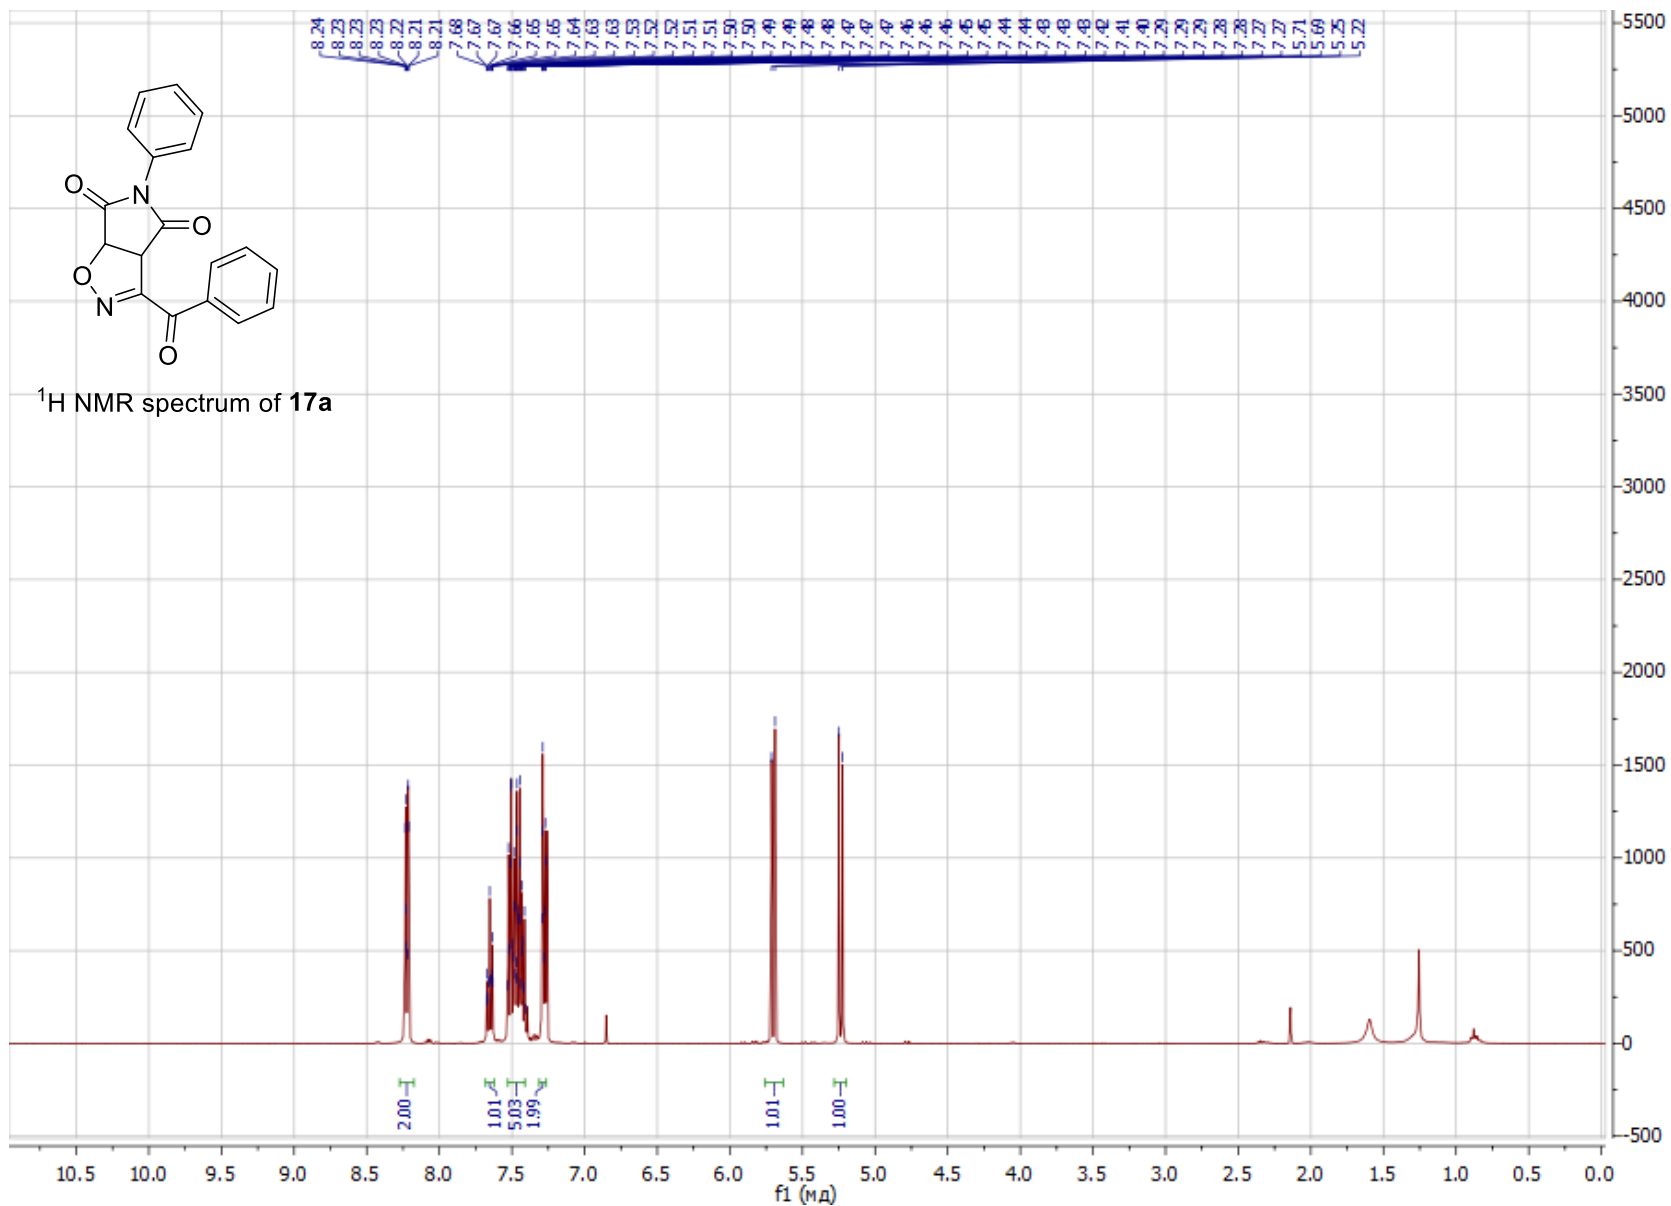



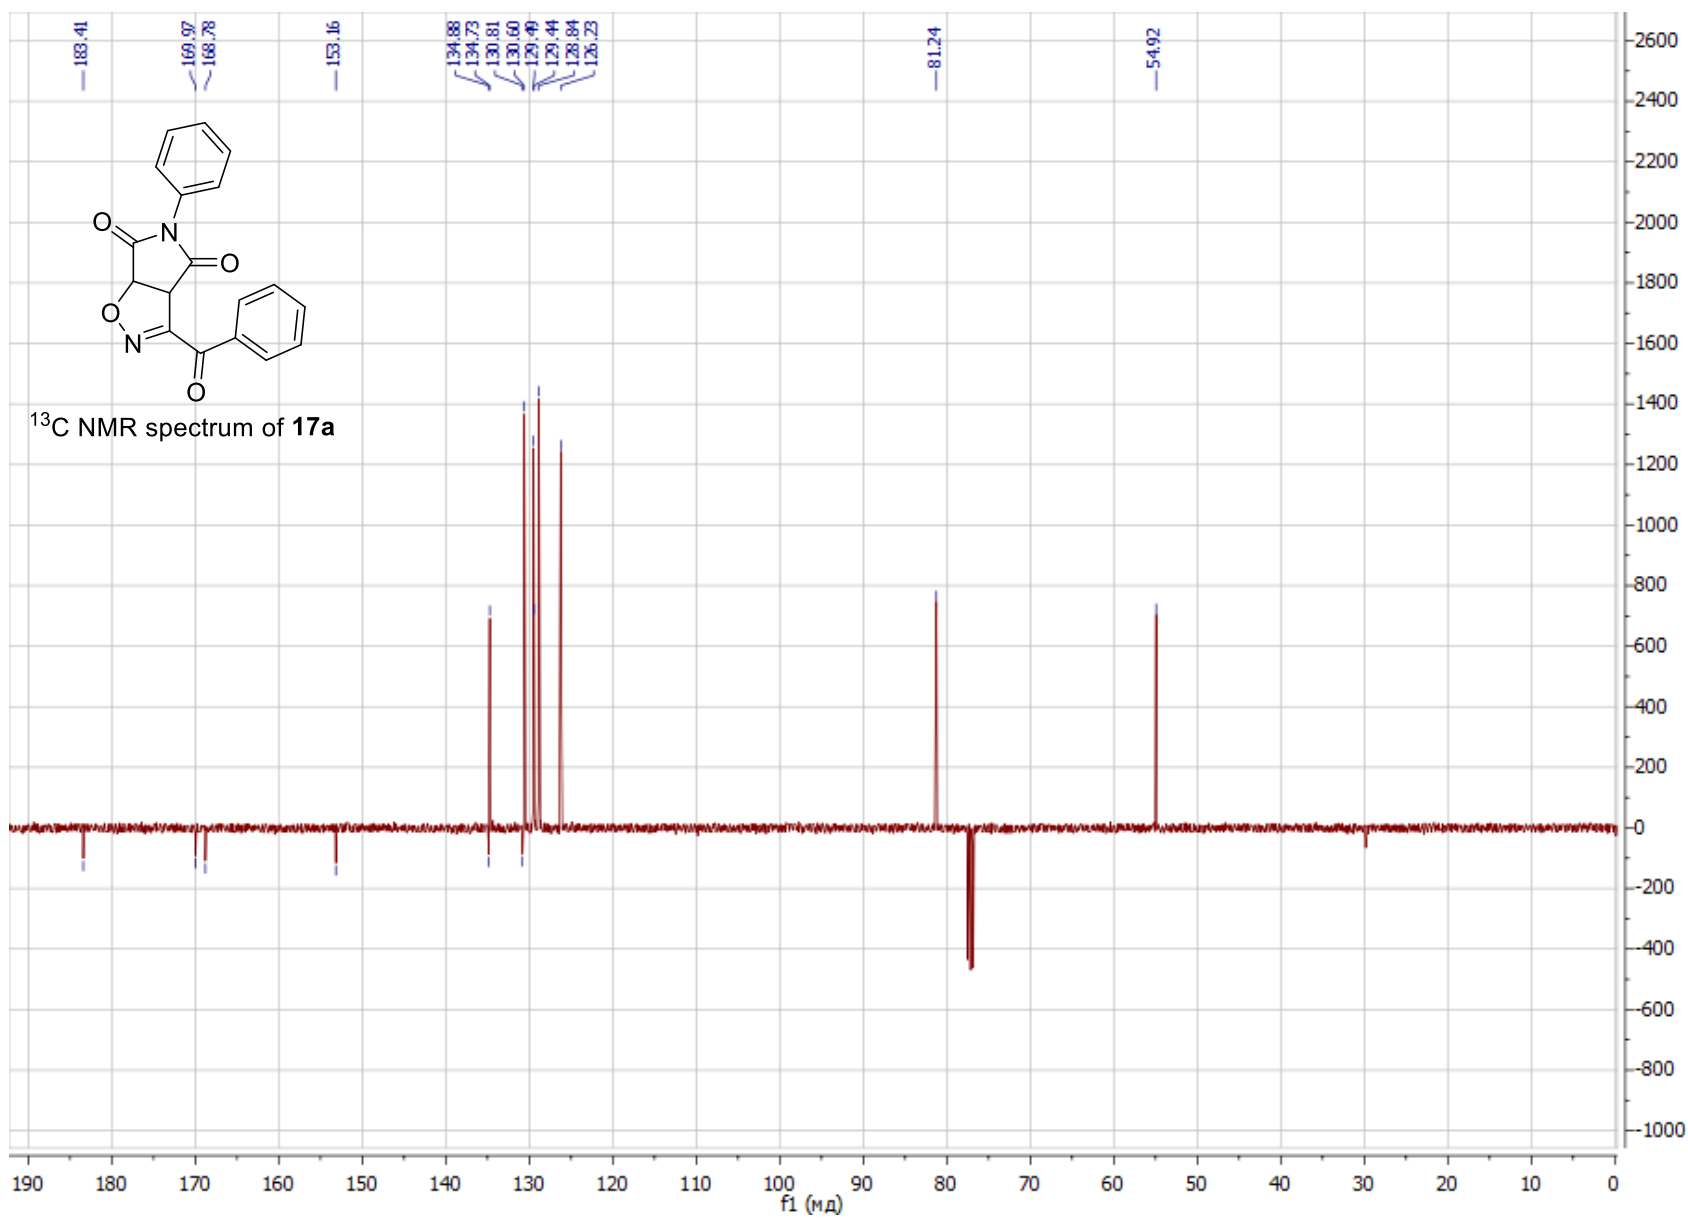

# <sup>1</sup>H and <sup>13</sup>C NMR spectral charts for benzamides (18)

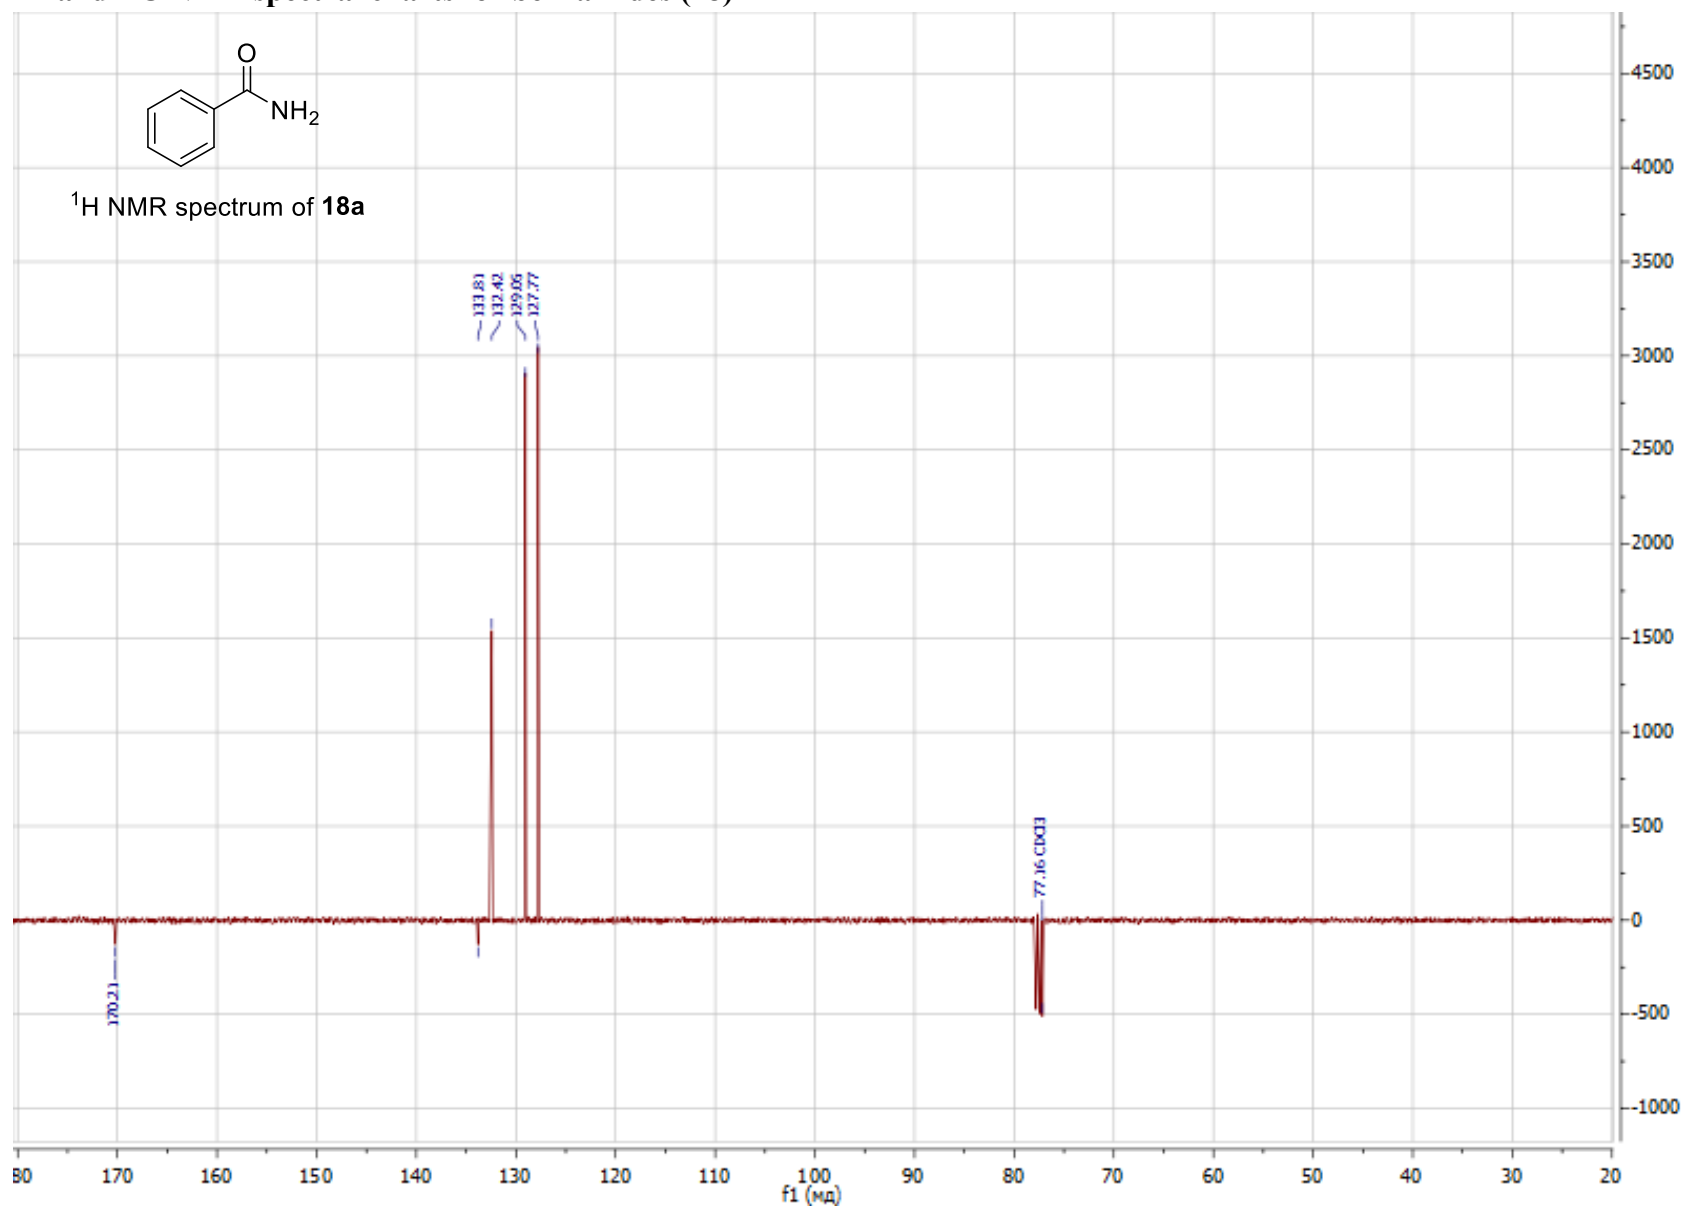

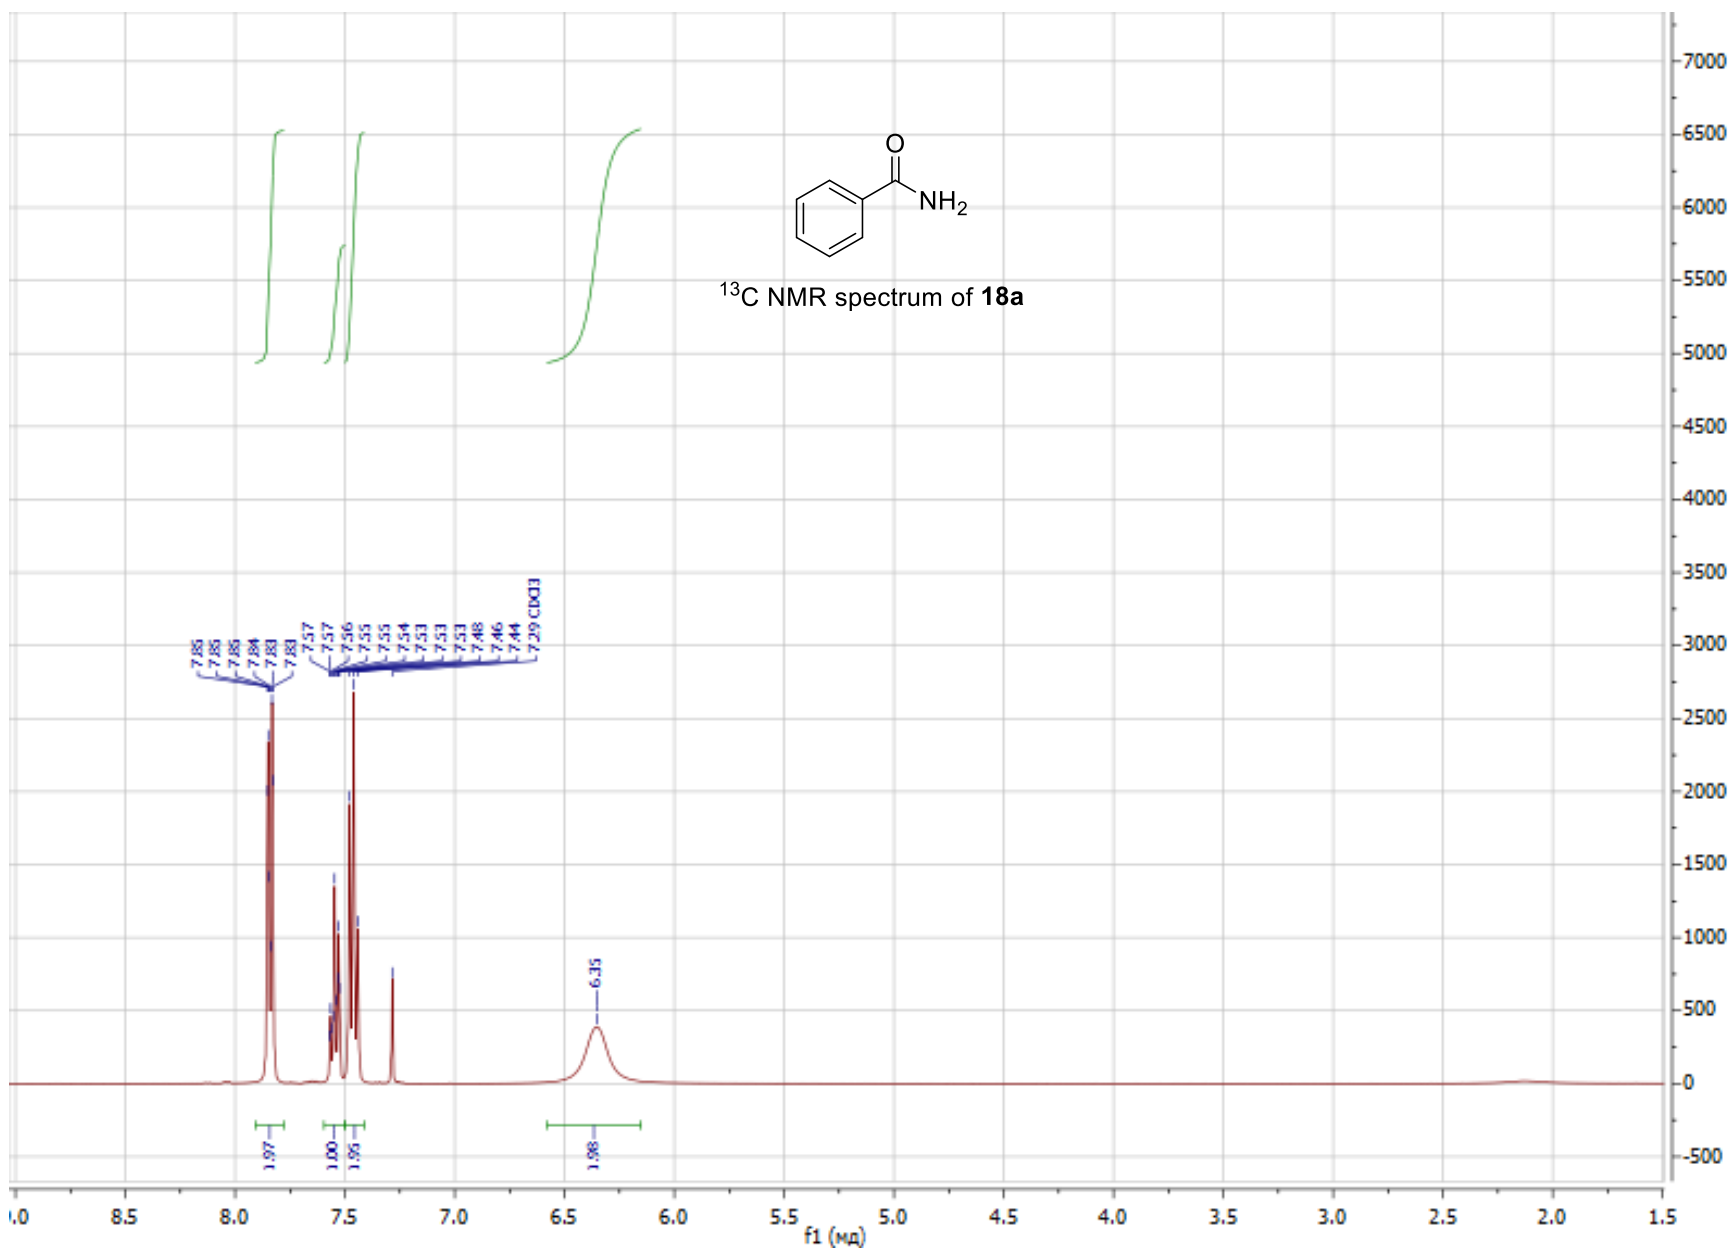

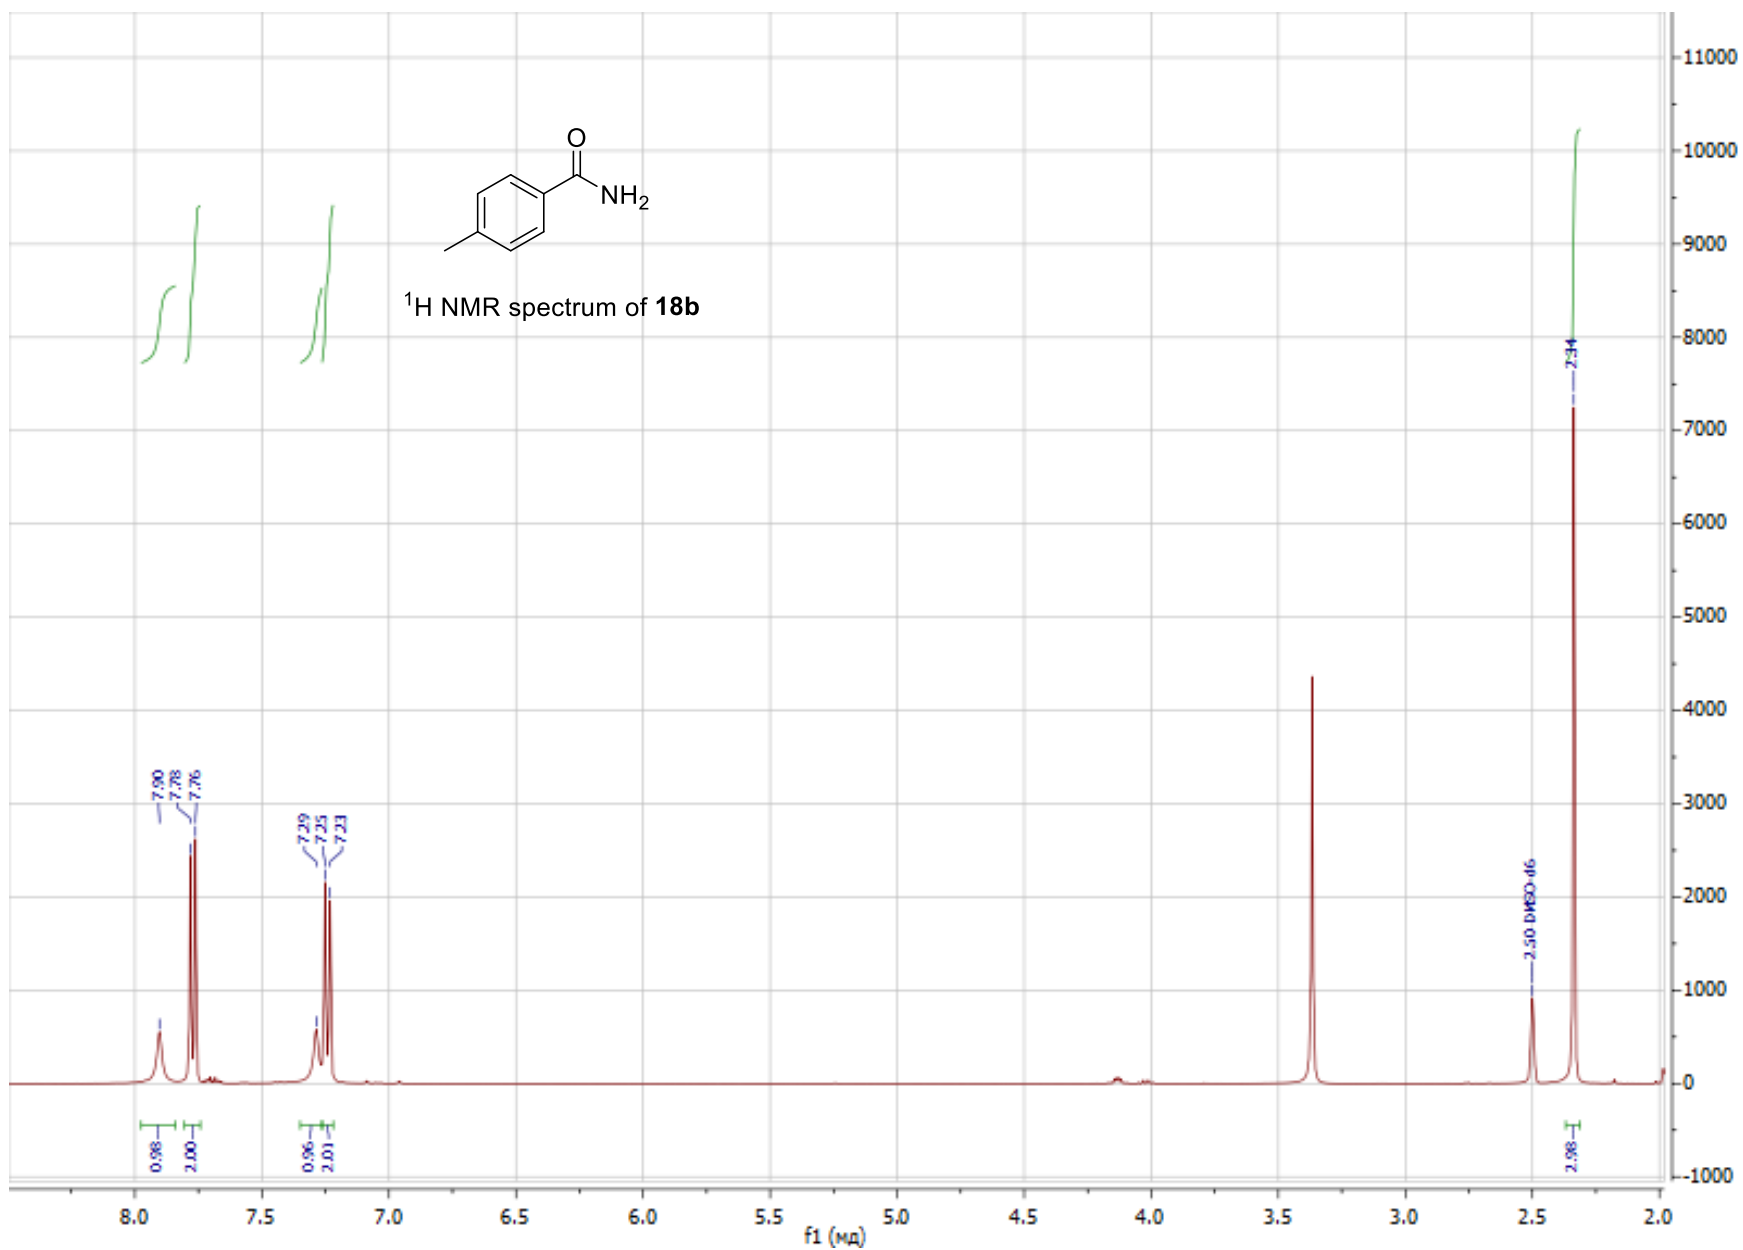

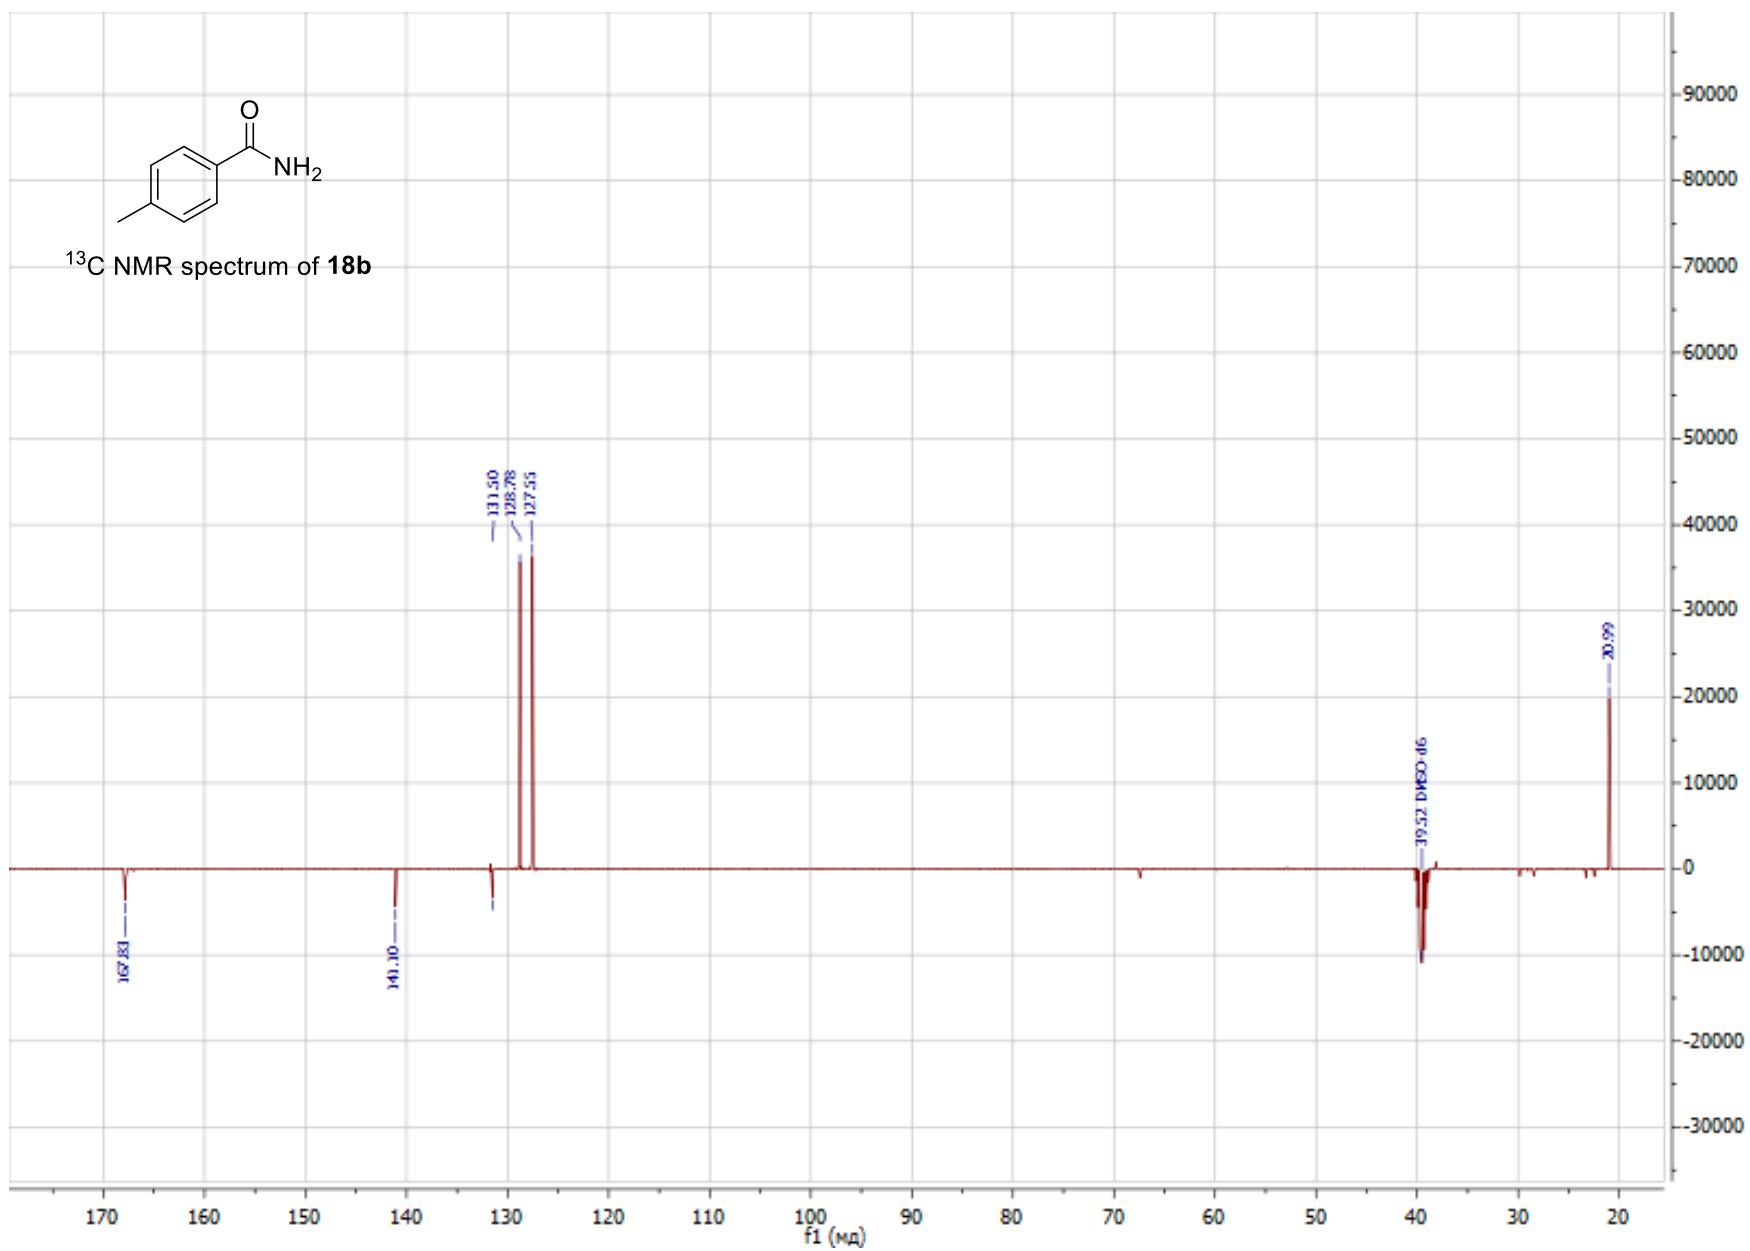

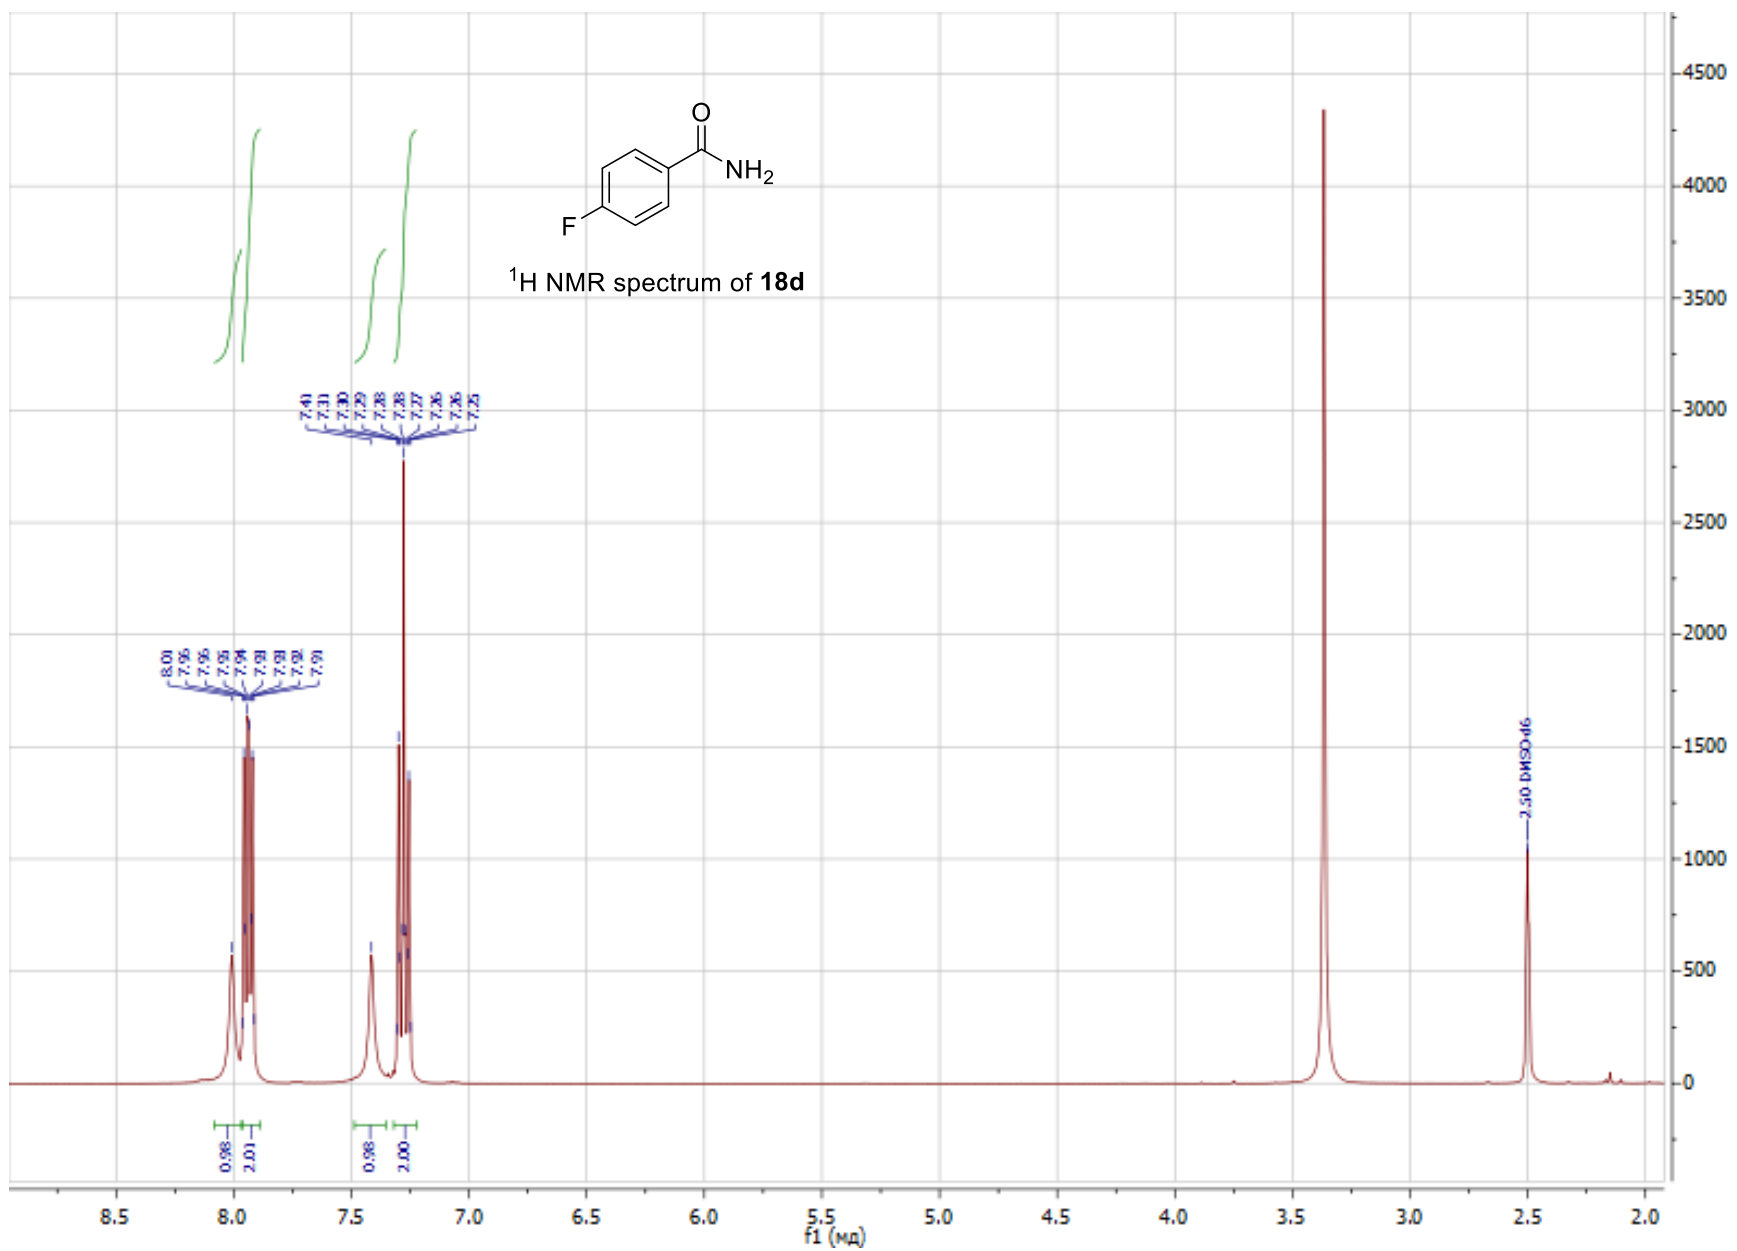

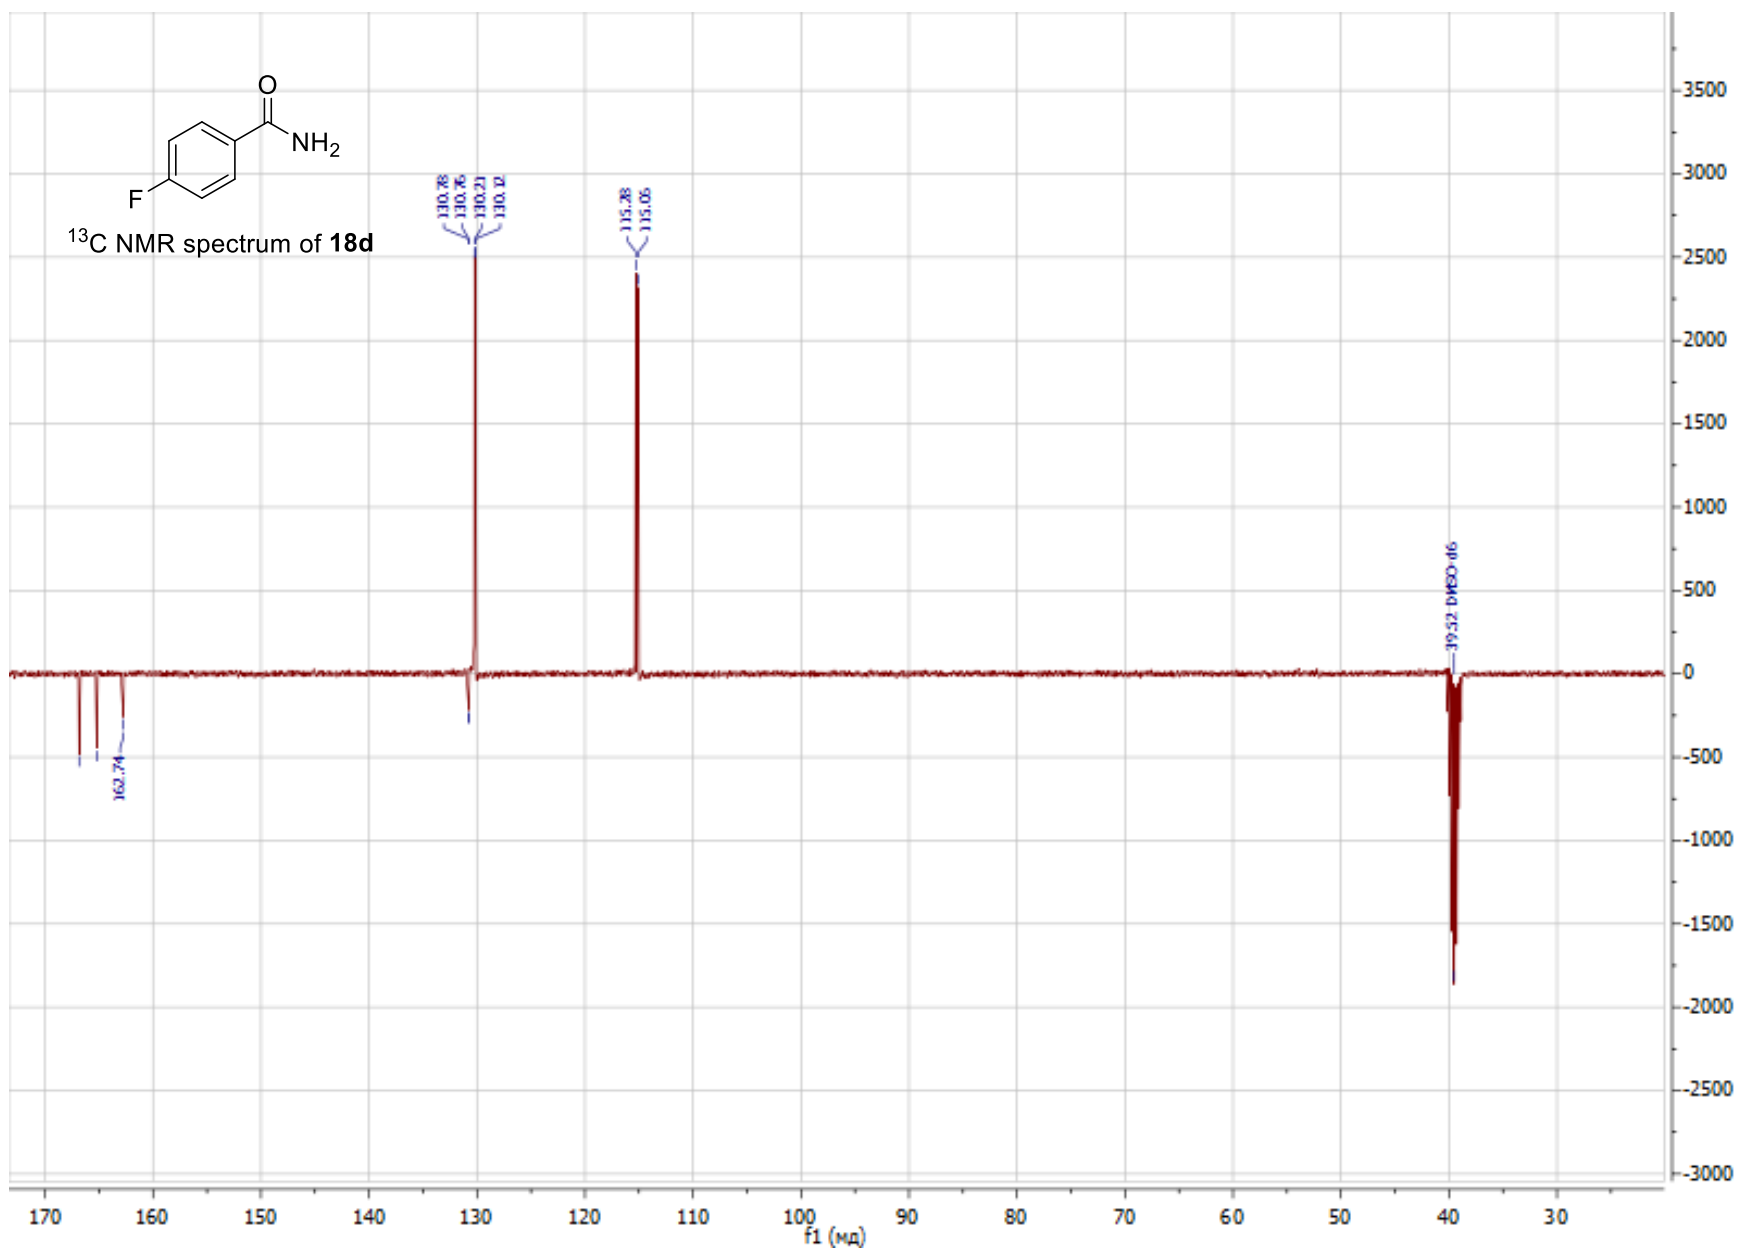

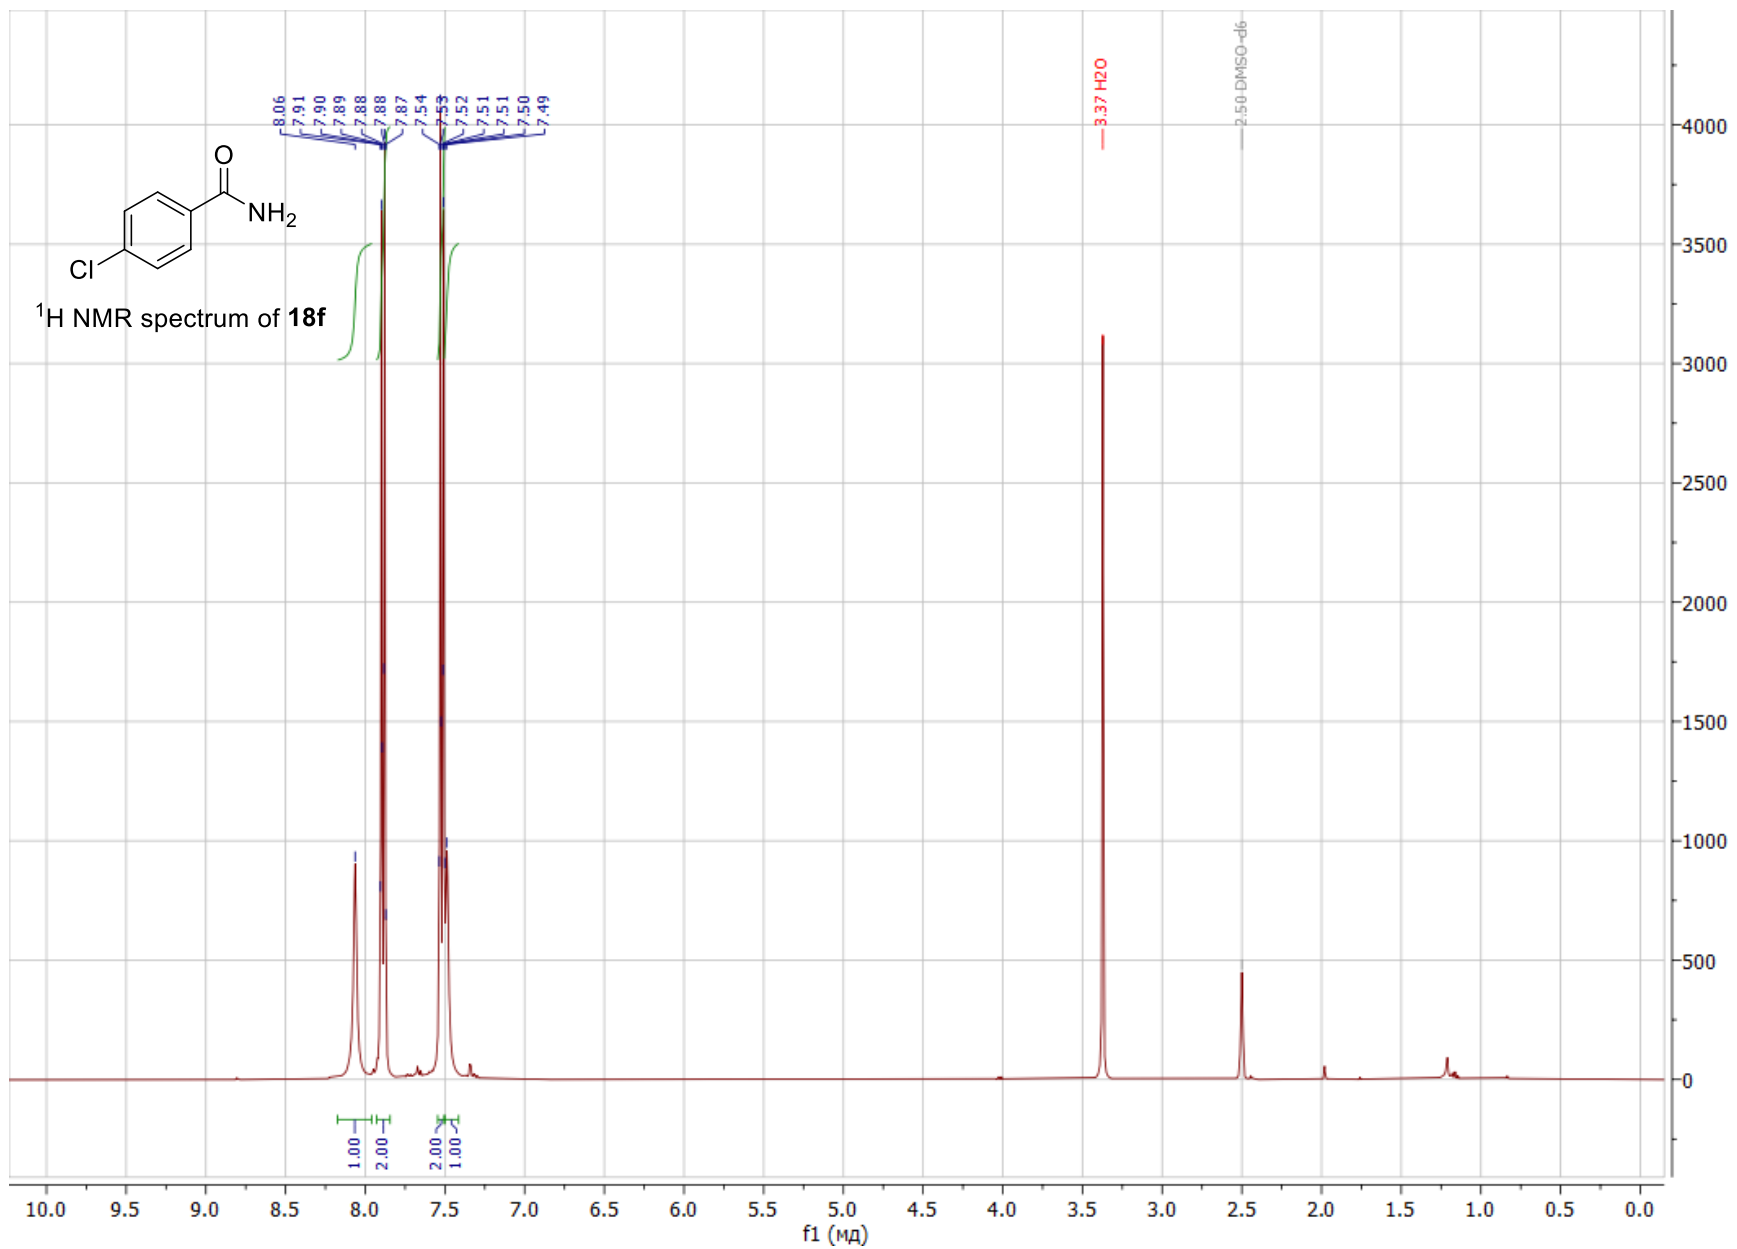



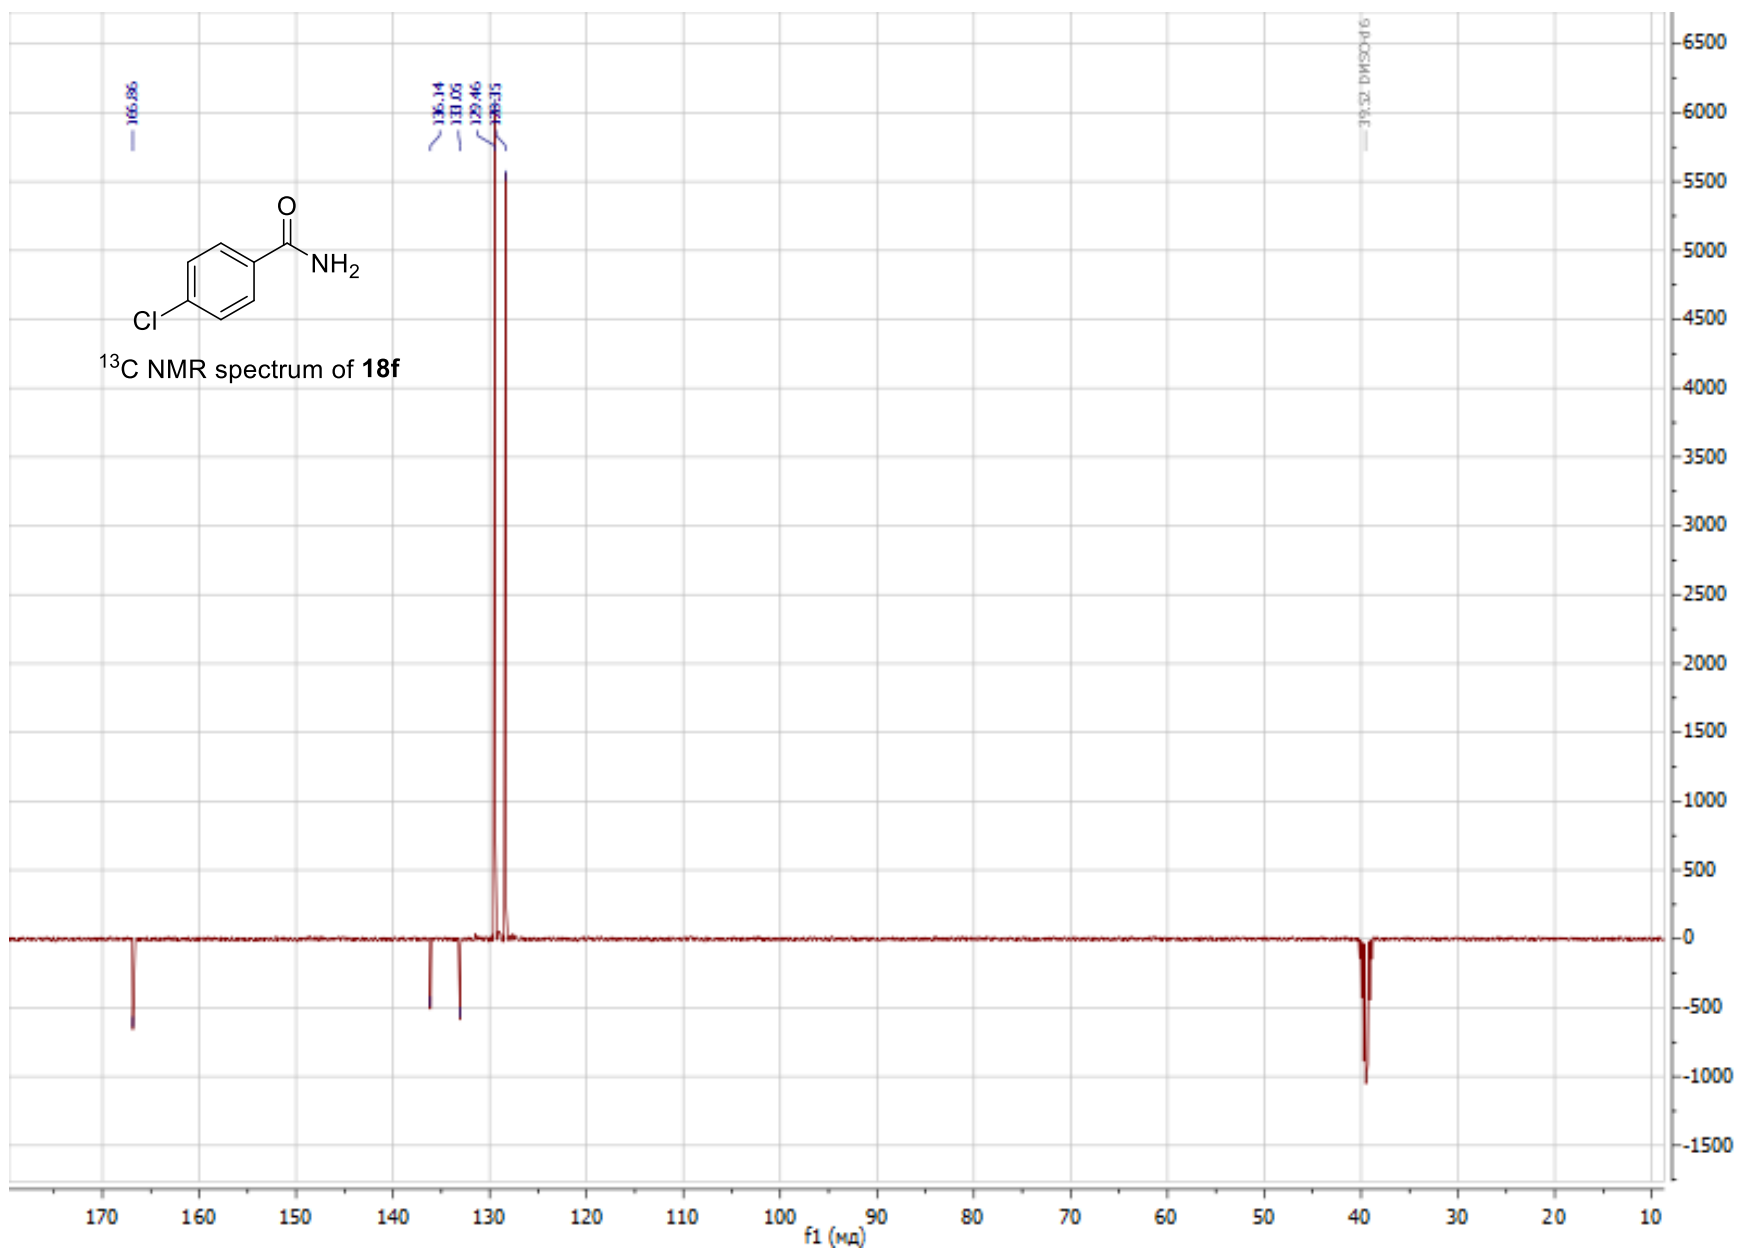

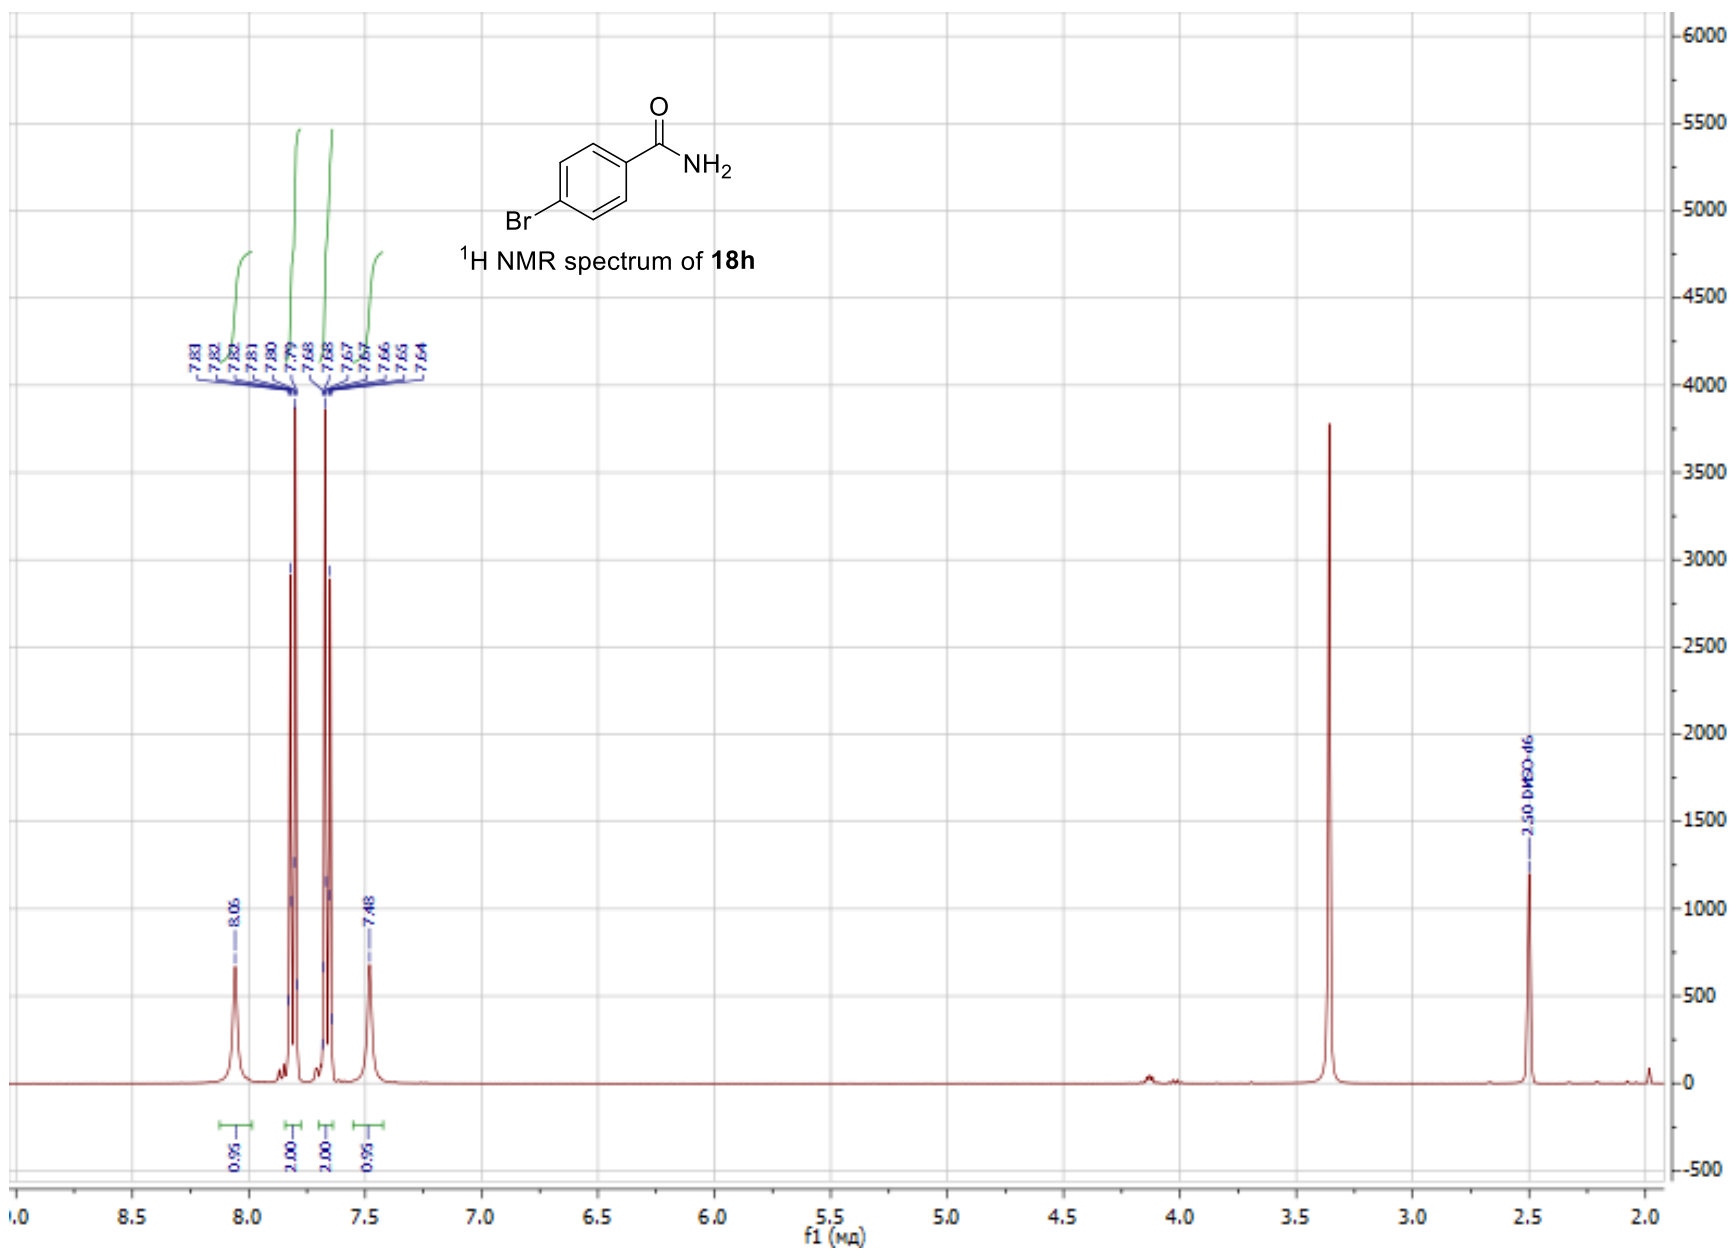

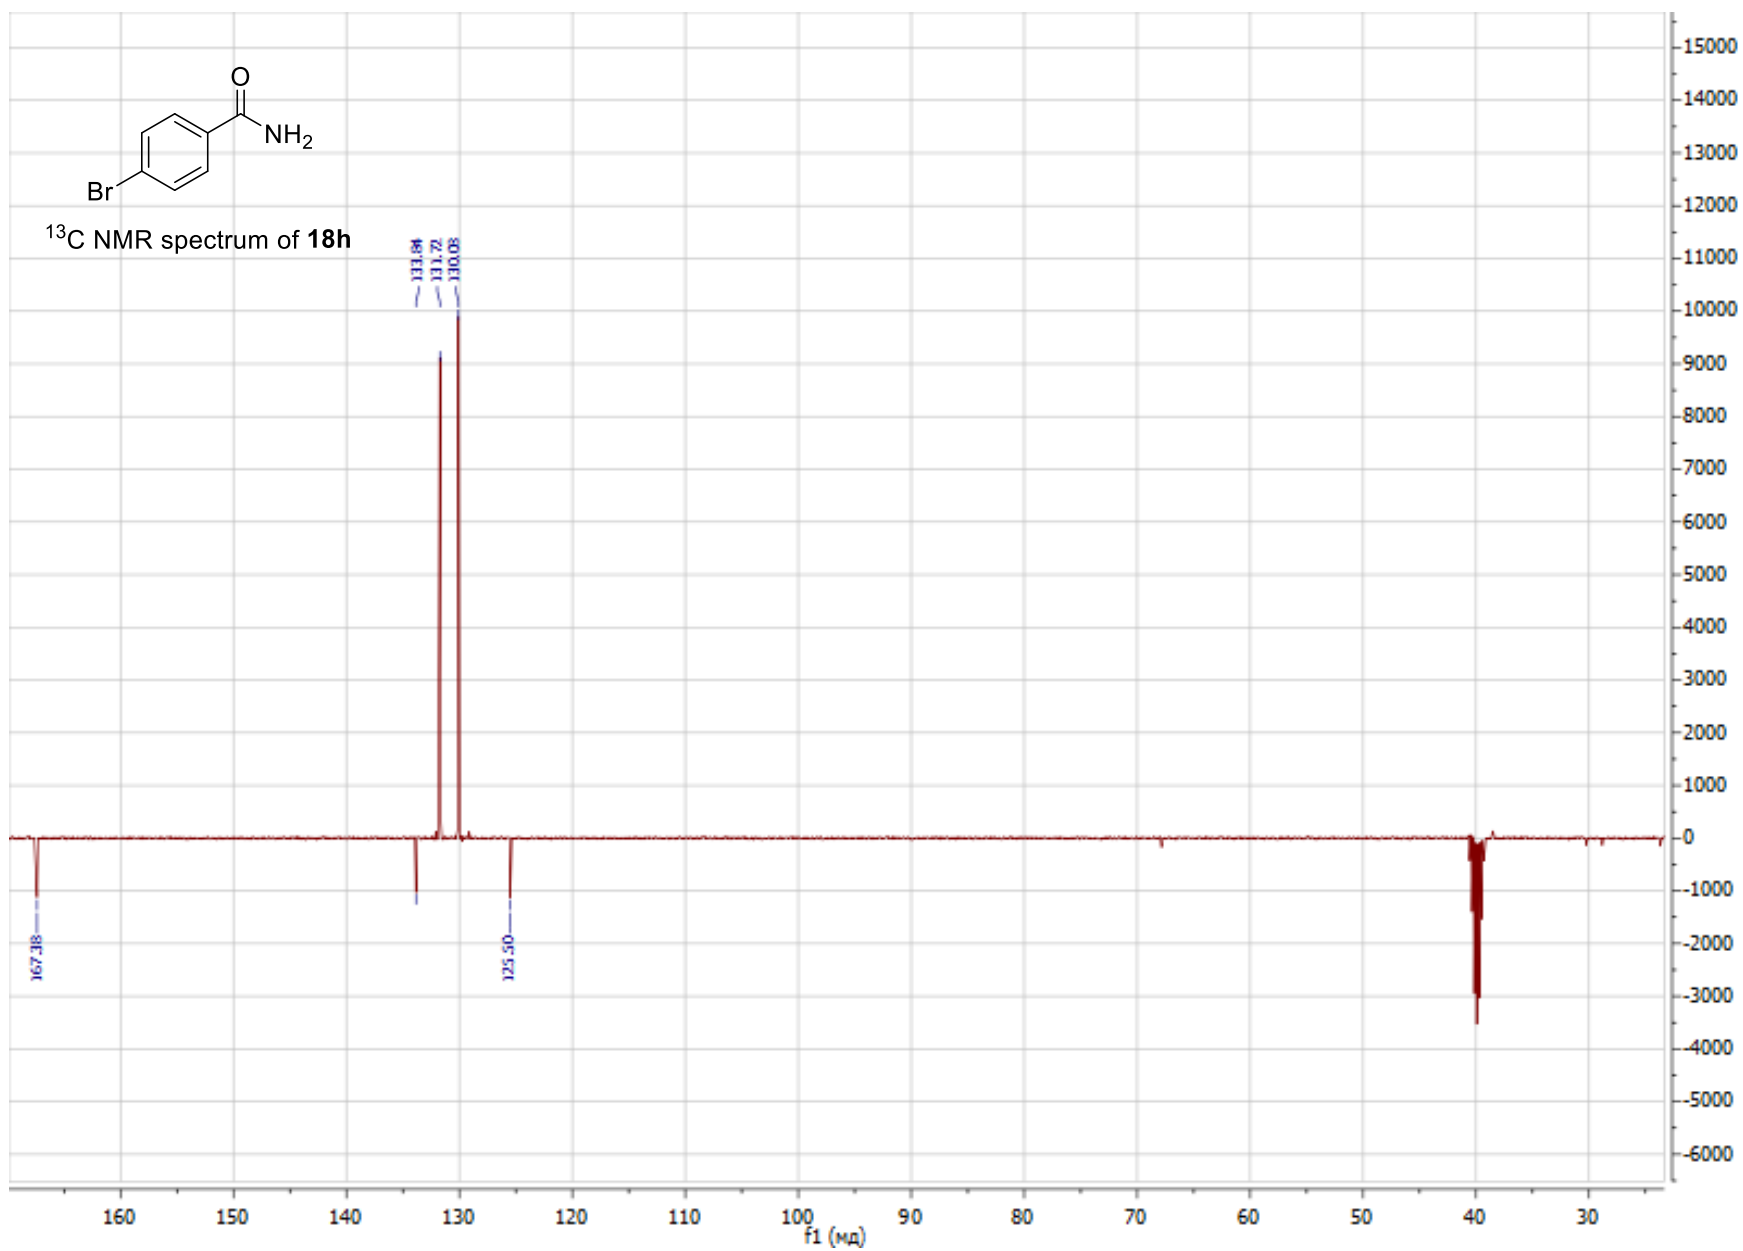

**$^1\text{H}$  and  $^{13}\text{C}$  NMR spectral charts for starting 4-chlorobenzoic acid (19f)**

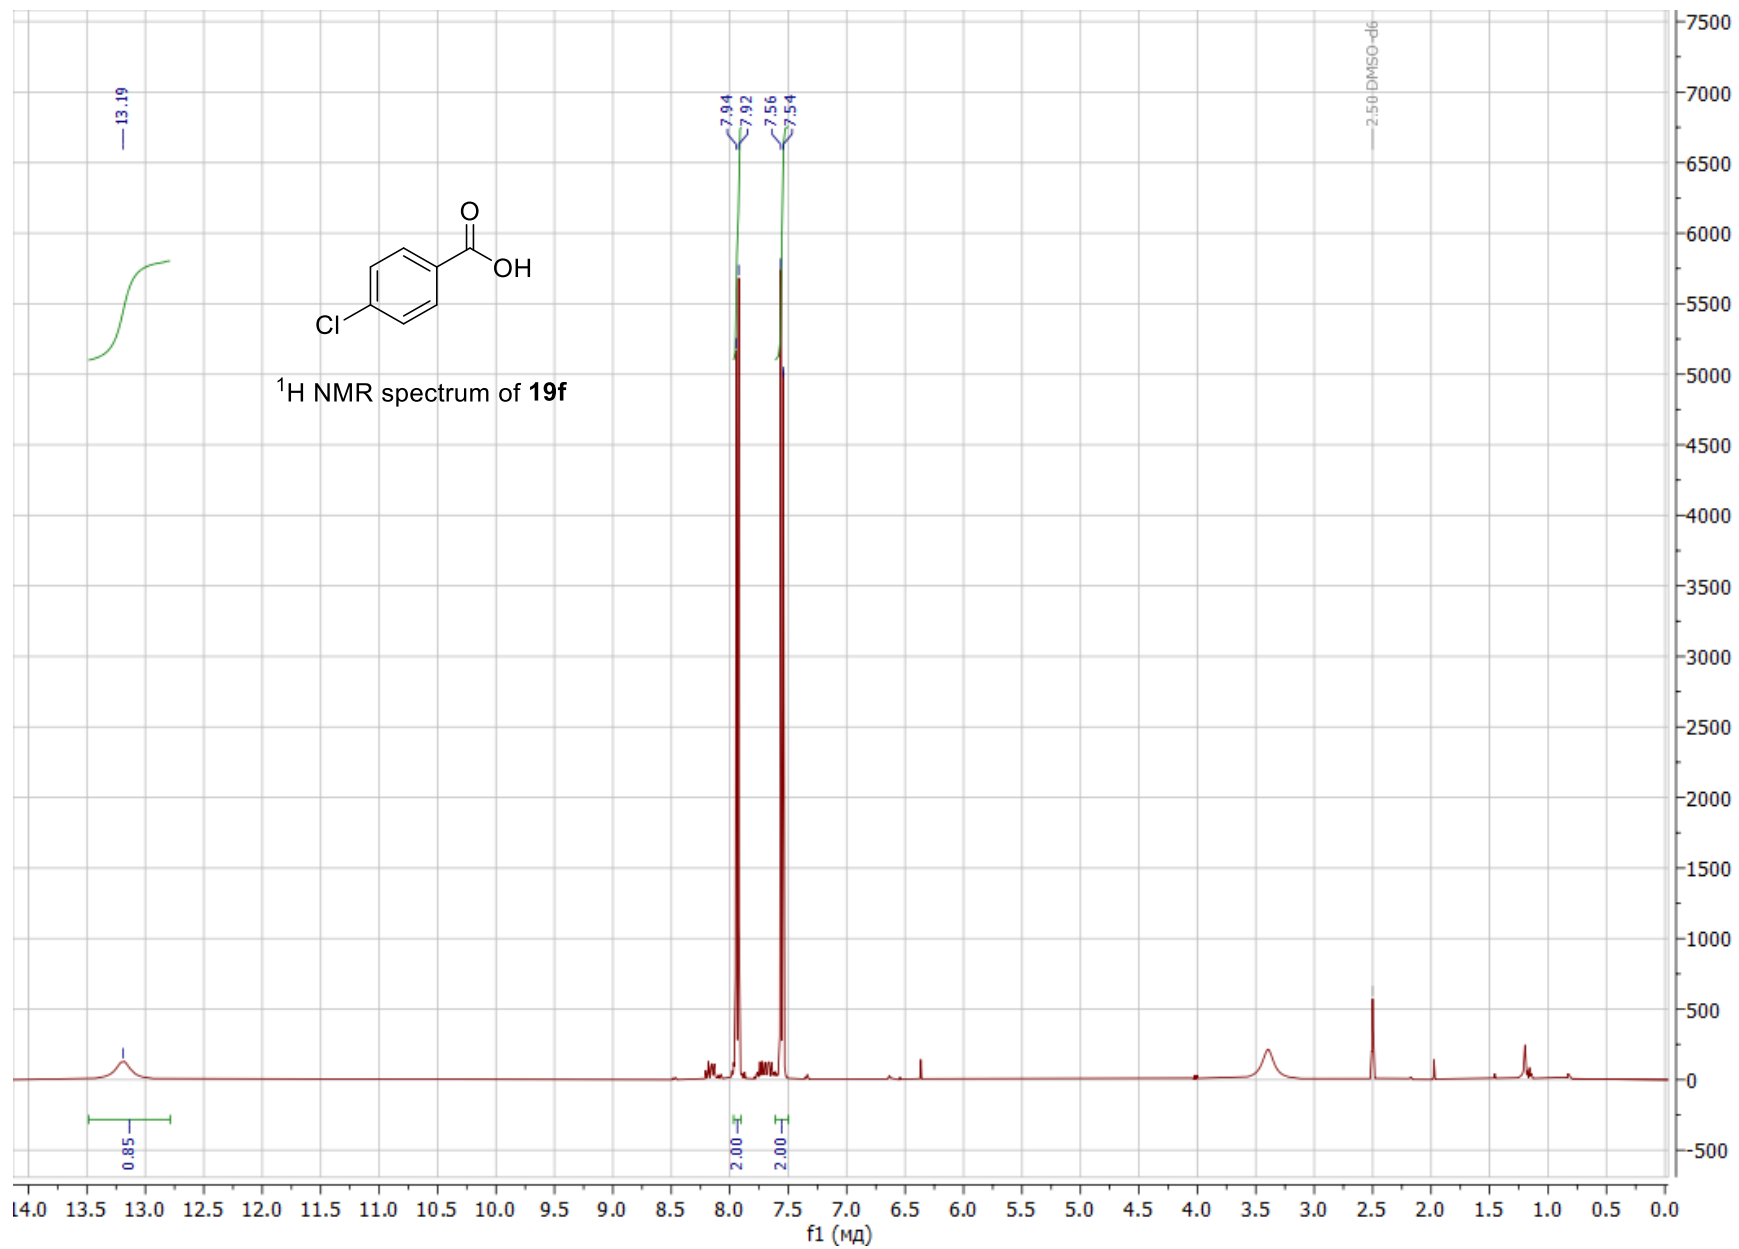

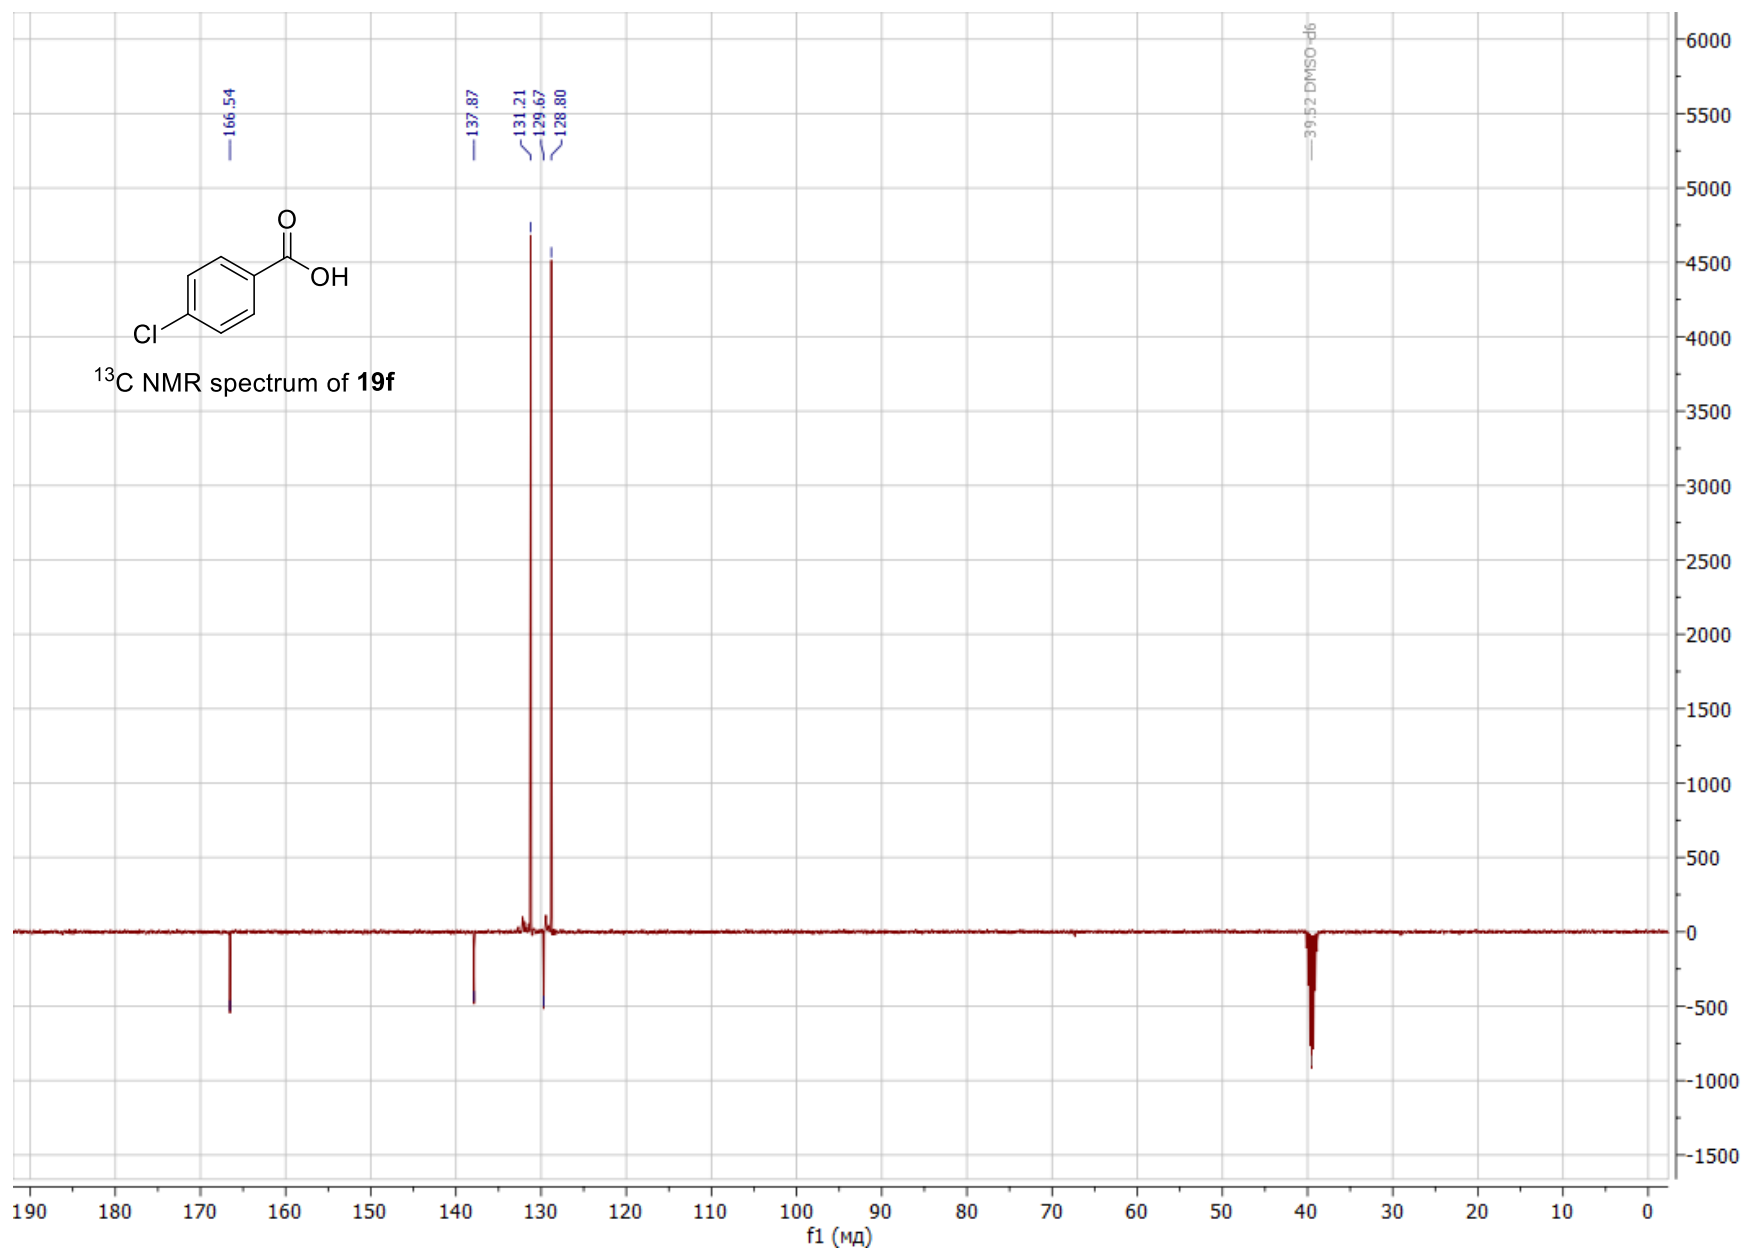

## HRMS spectral charts

### HRMS spectral charts for starting 2-nitro-4'-ethylacetophenone (1c)

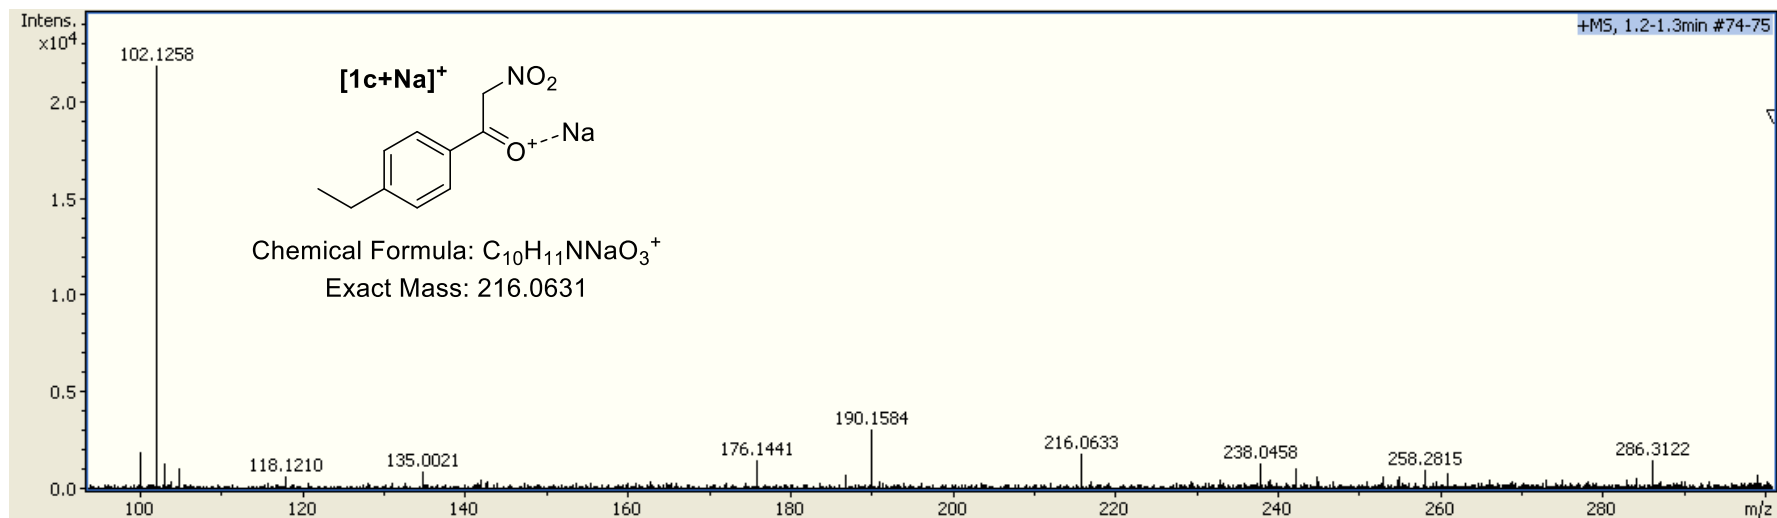

# HRMS spectral charts for furoxans 8

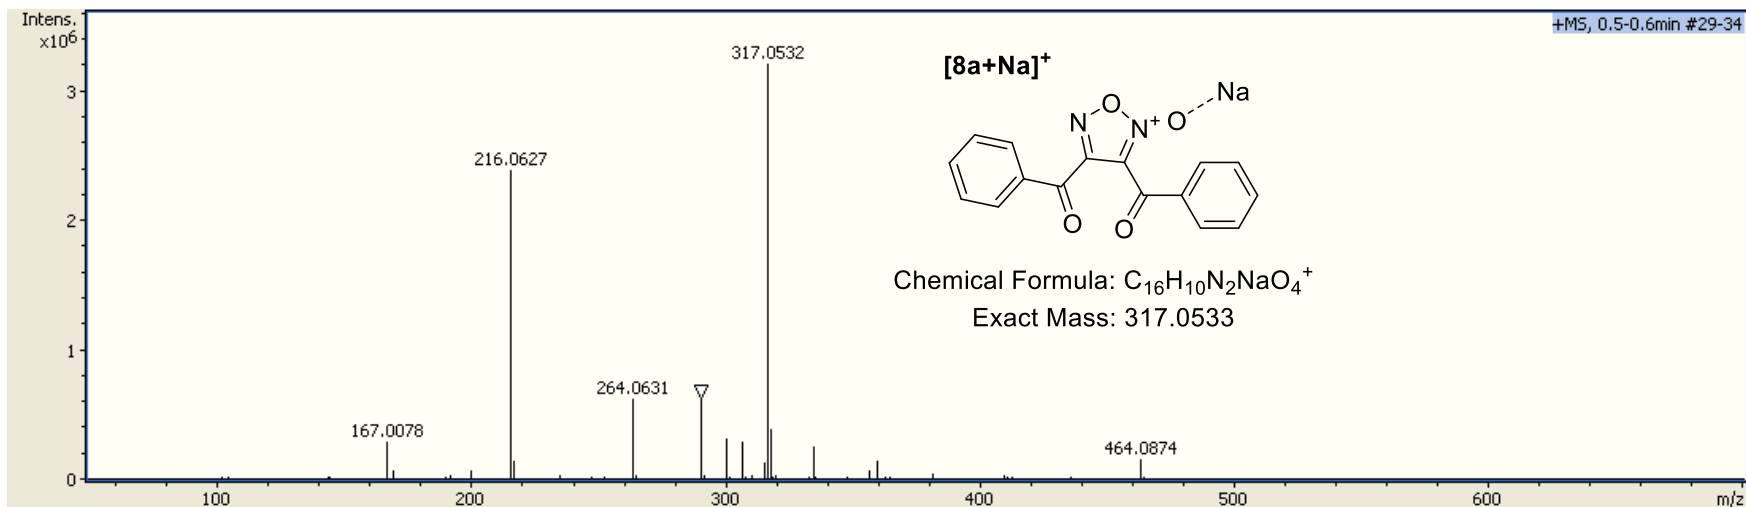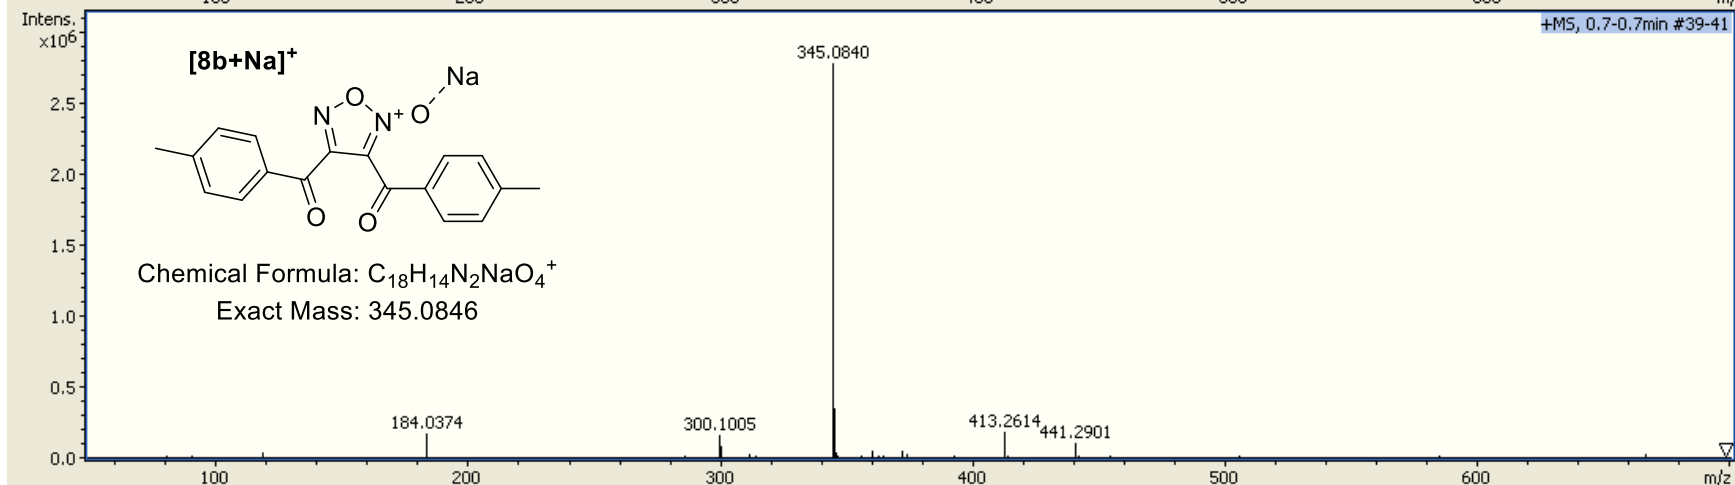

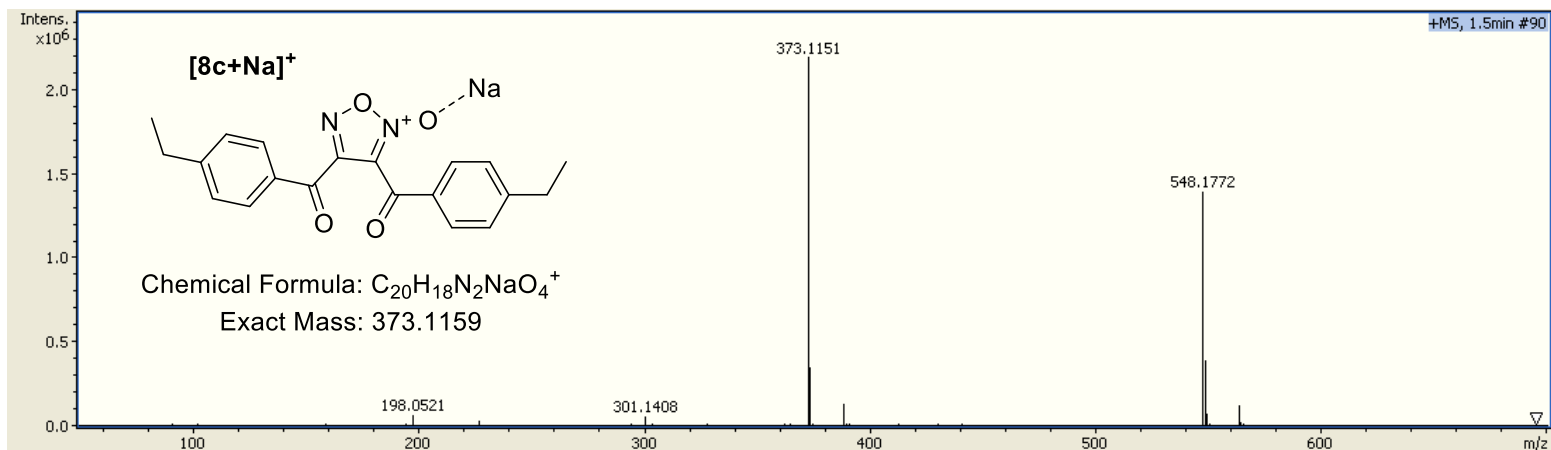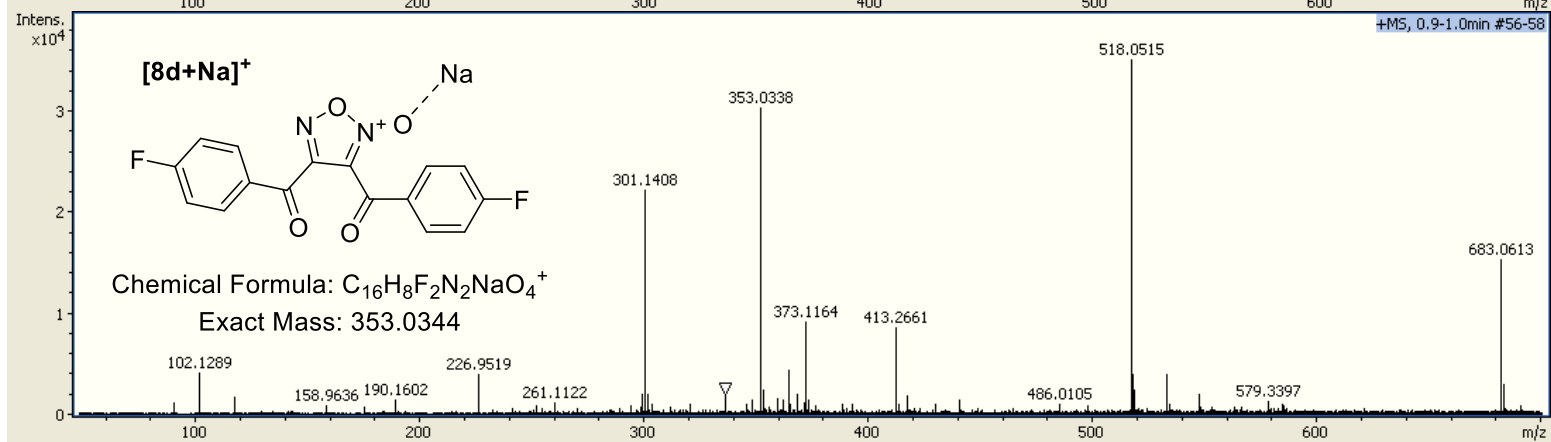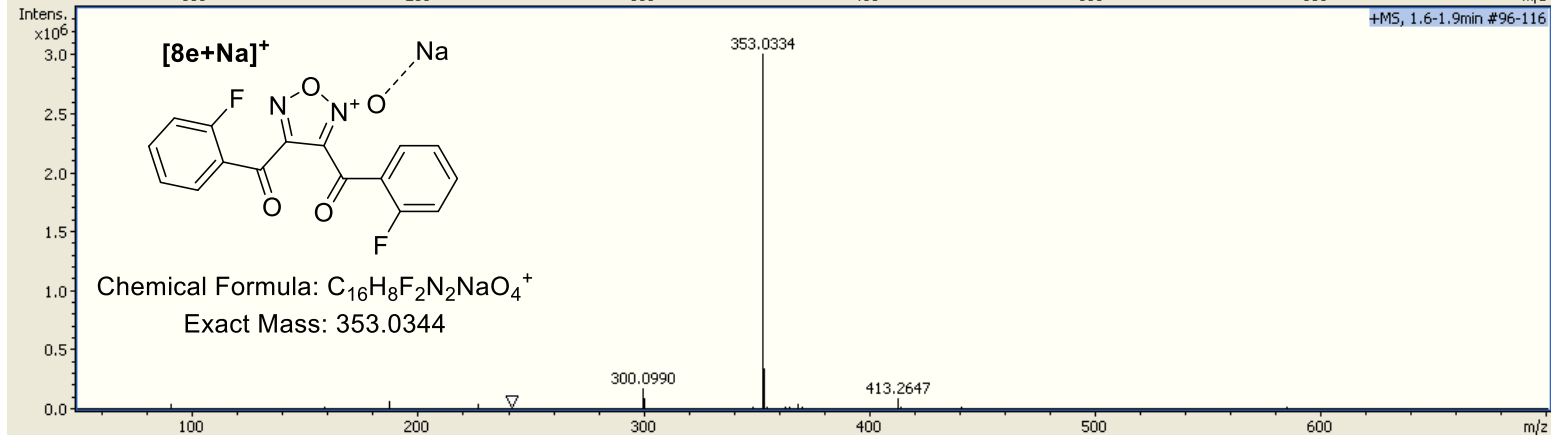



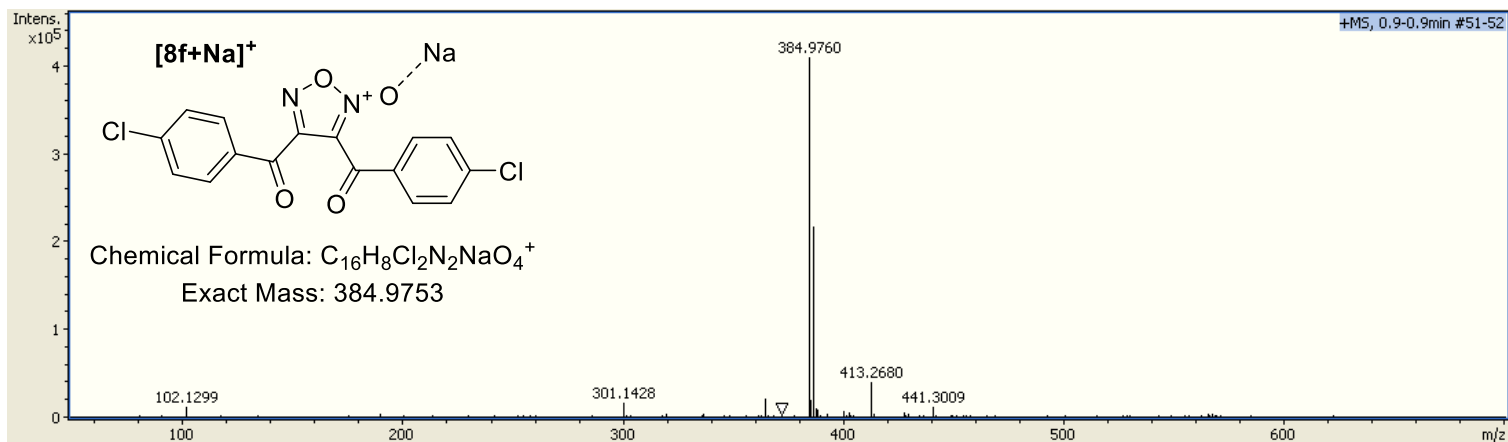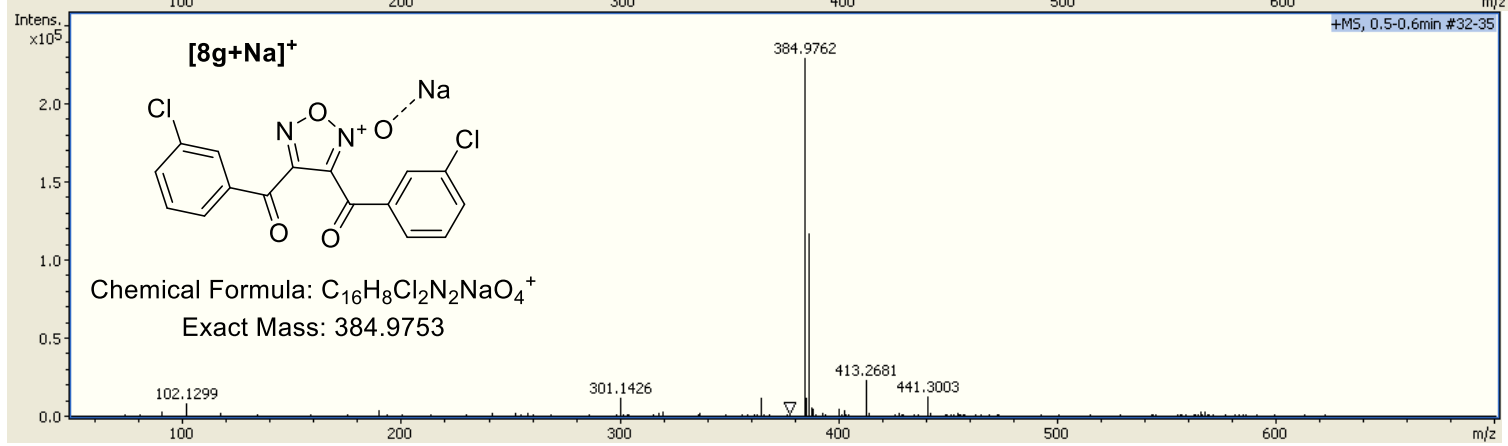

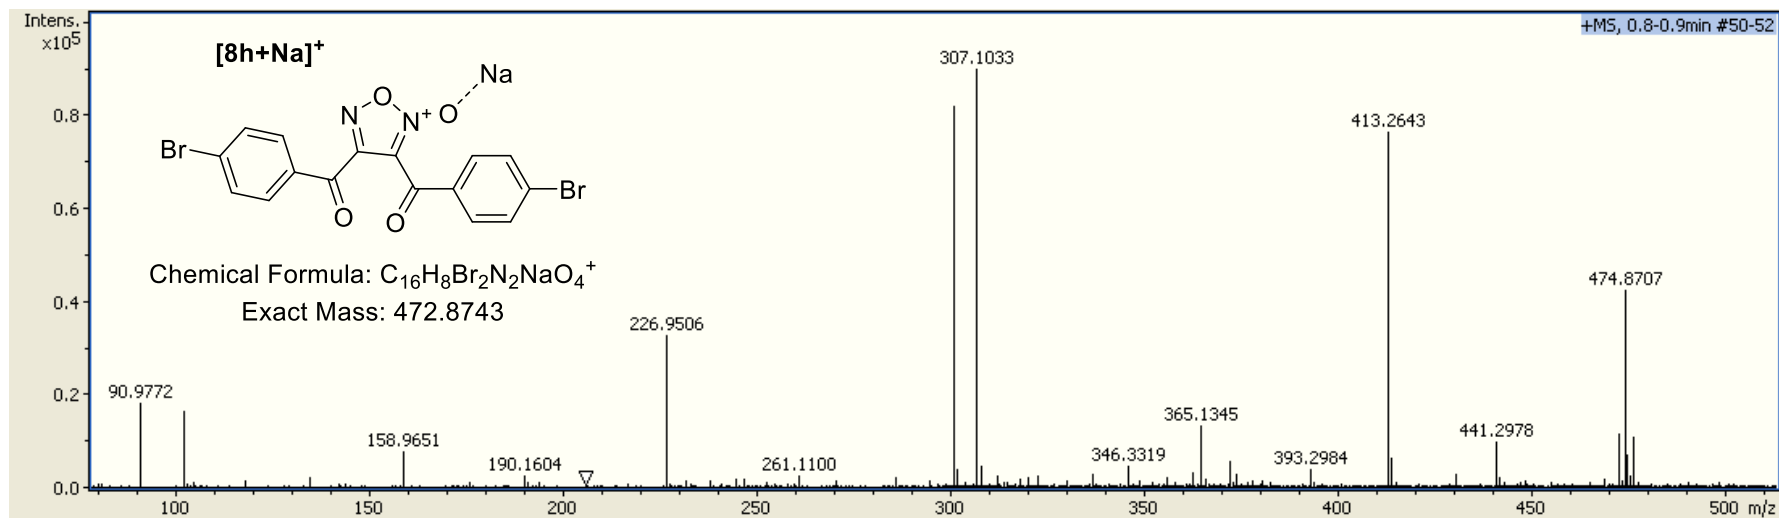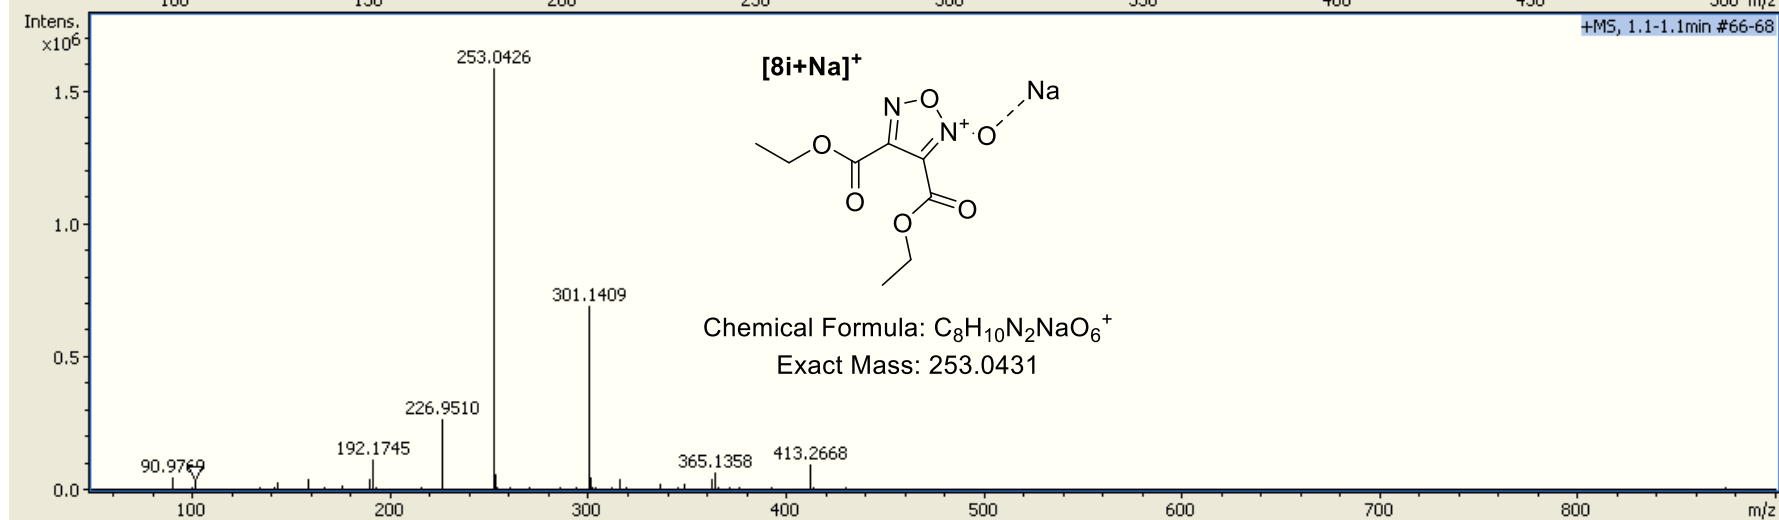

## HRMS spectral charts for isoxazoles 10

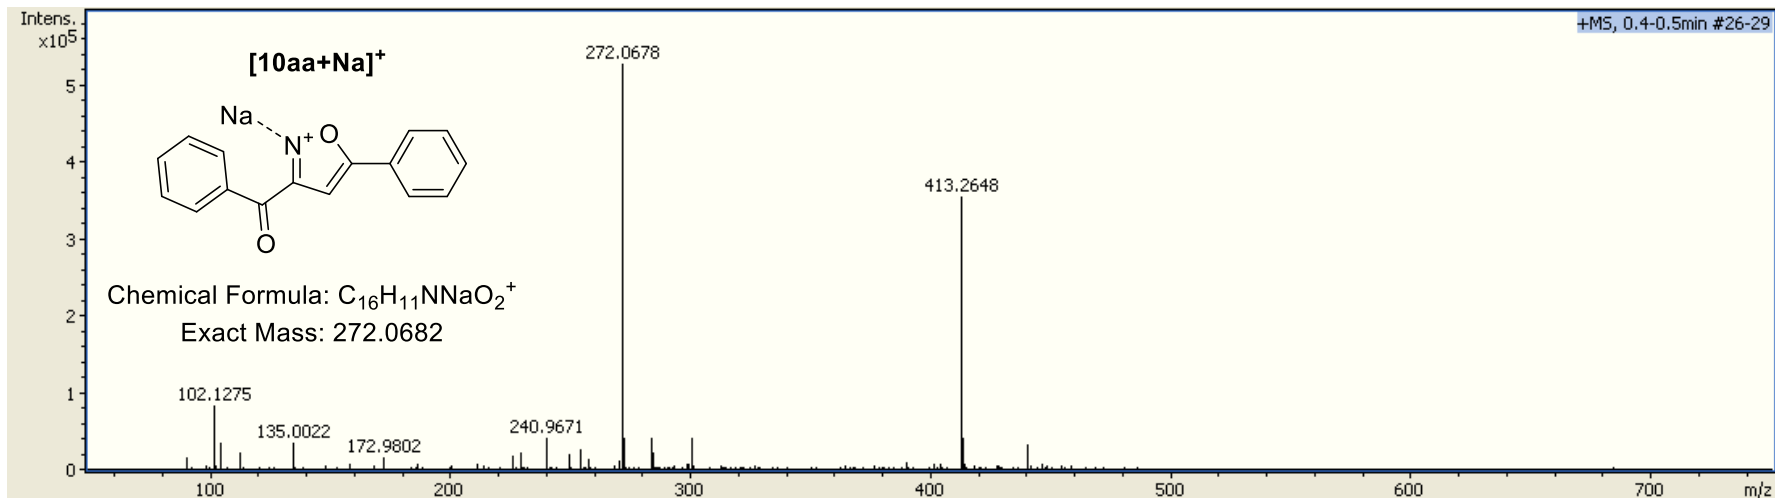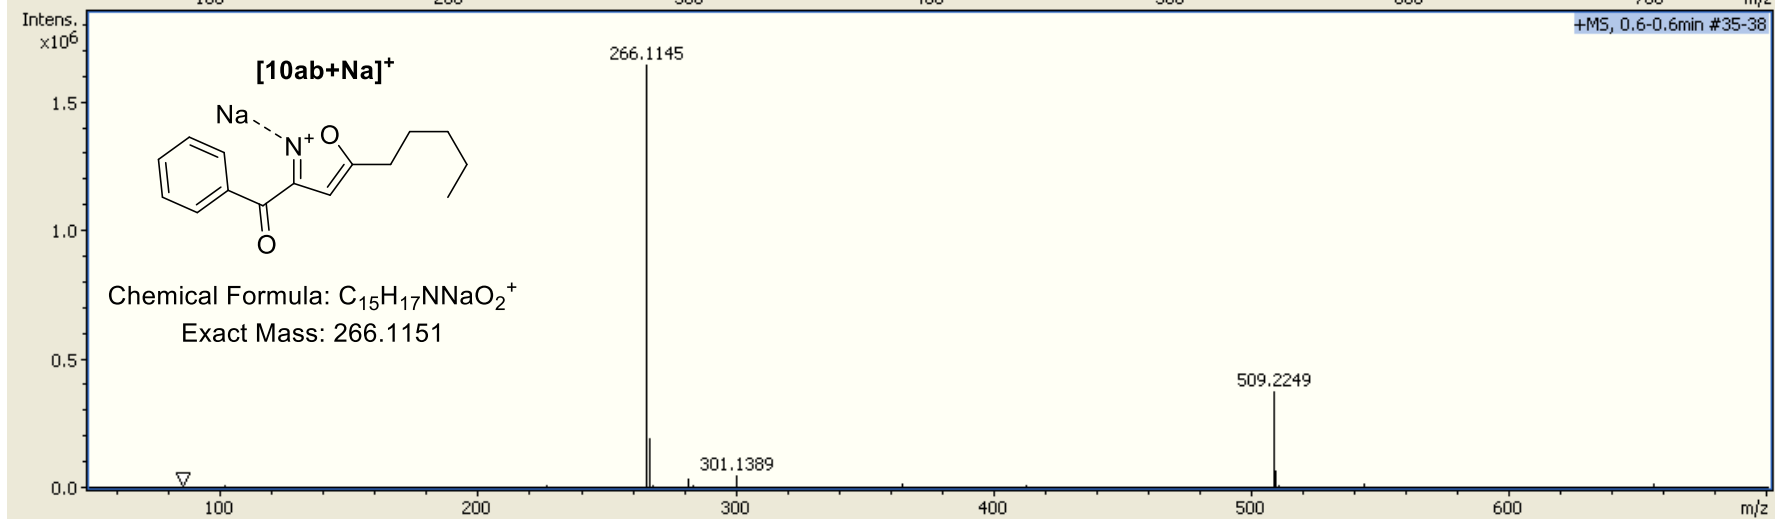

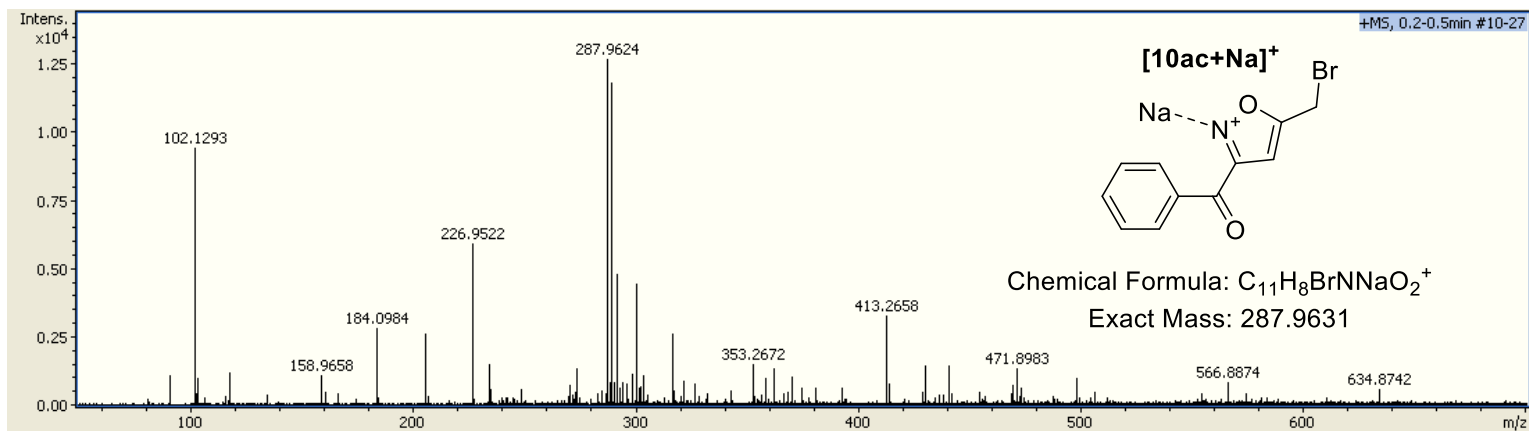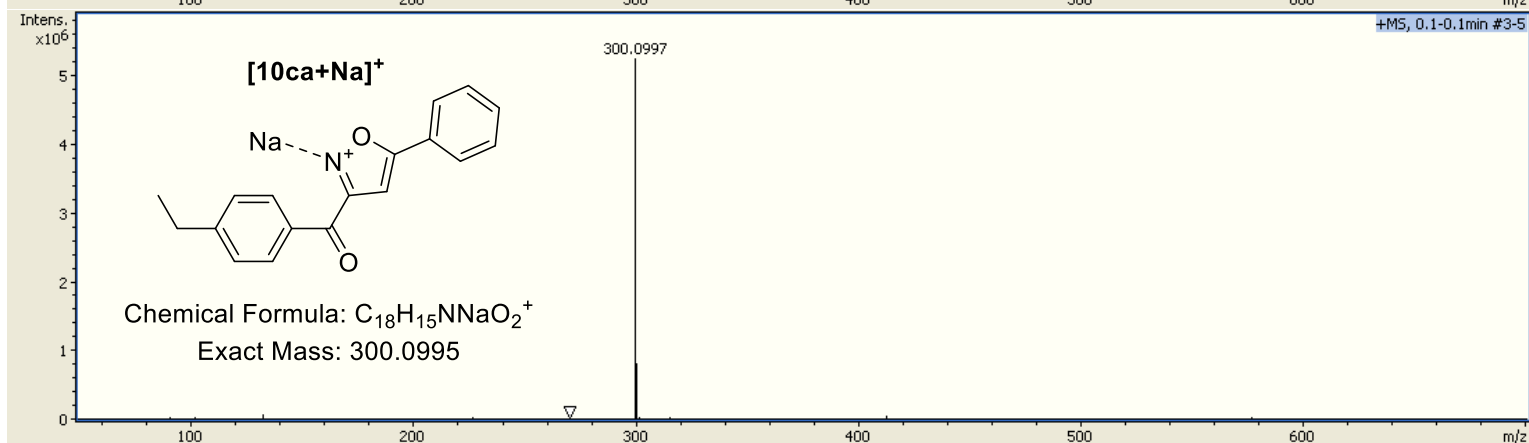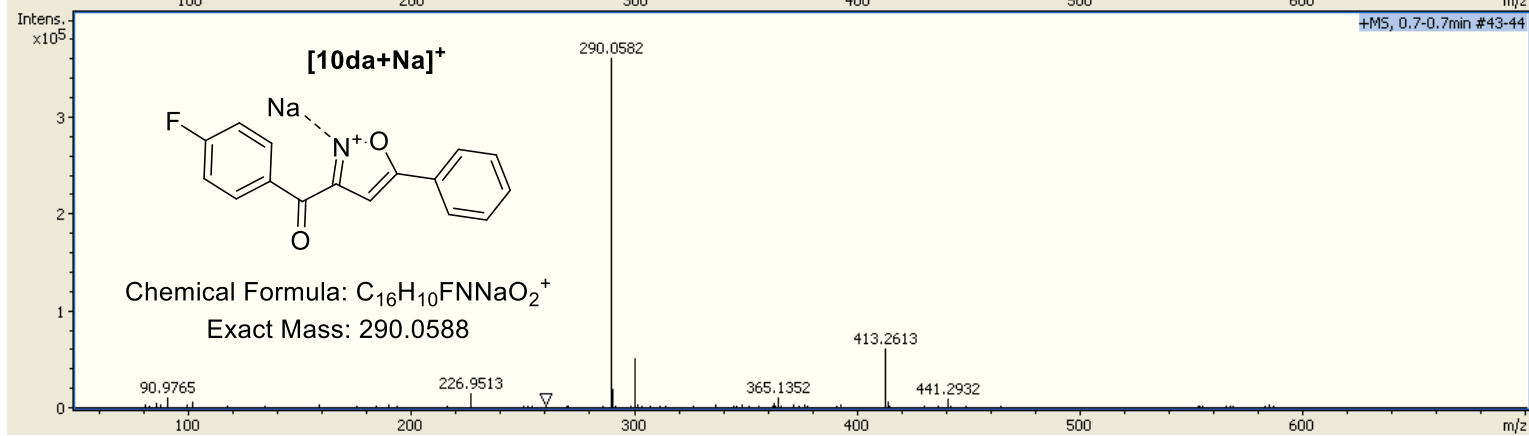

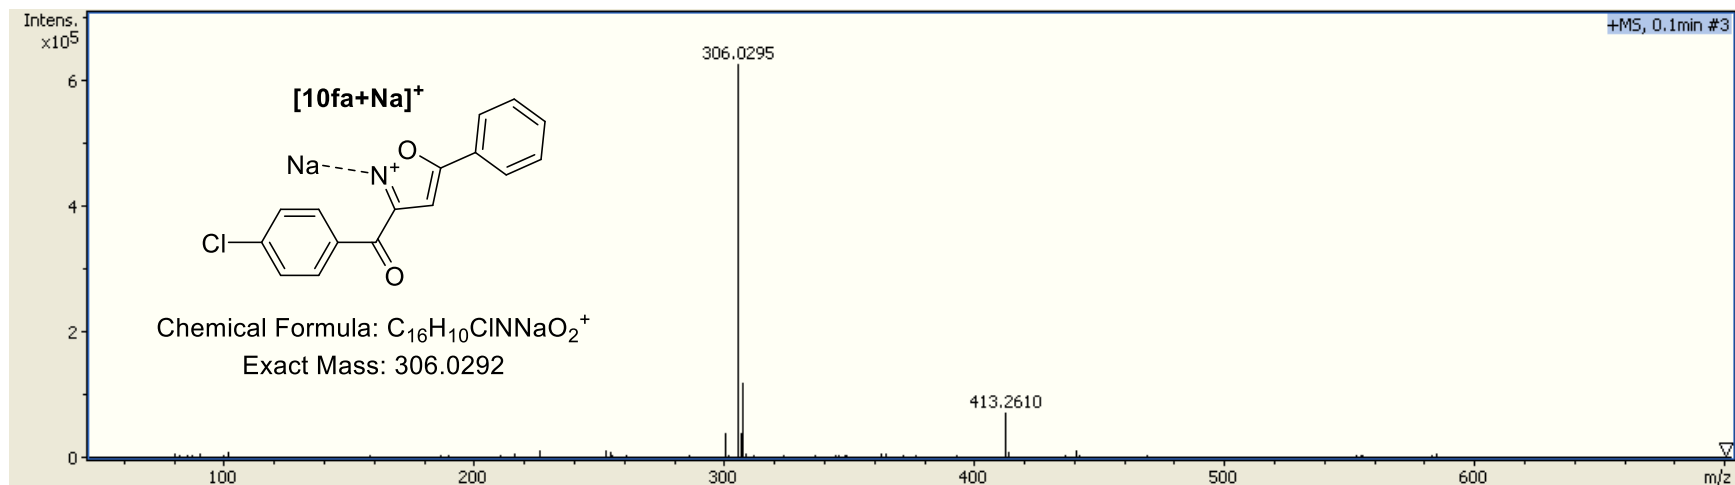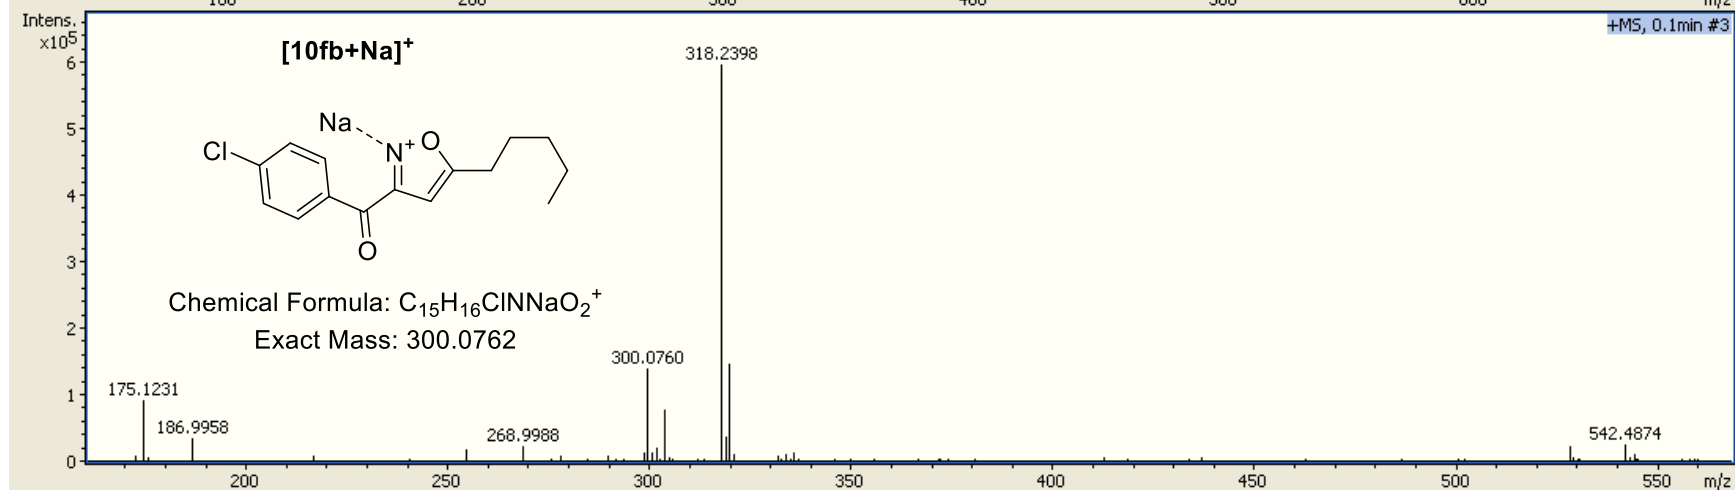

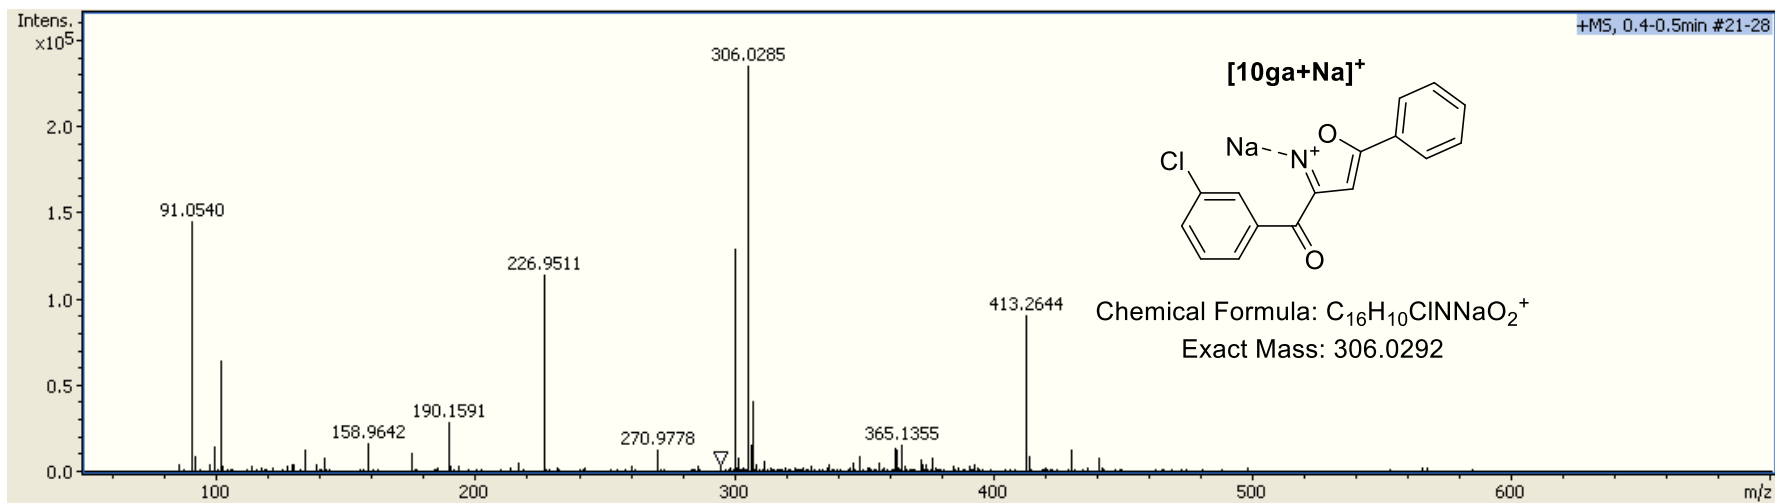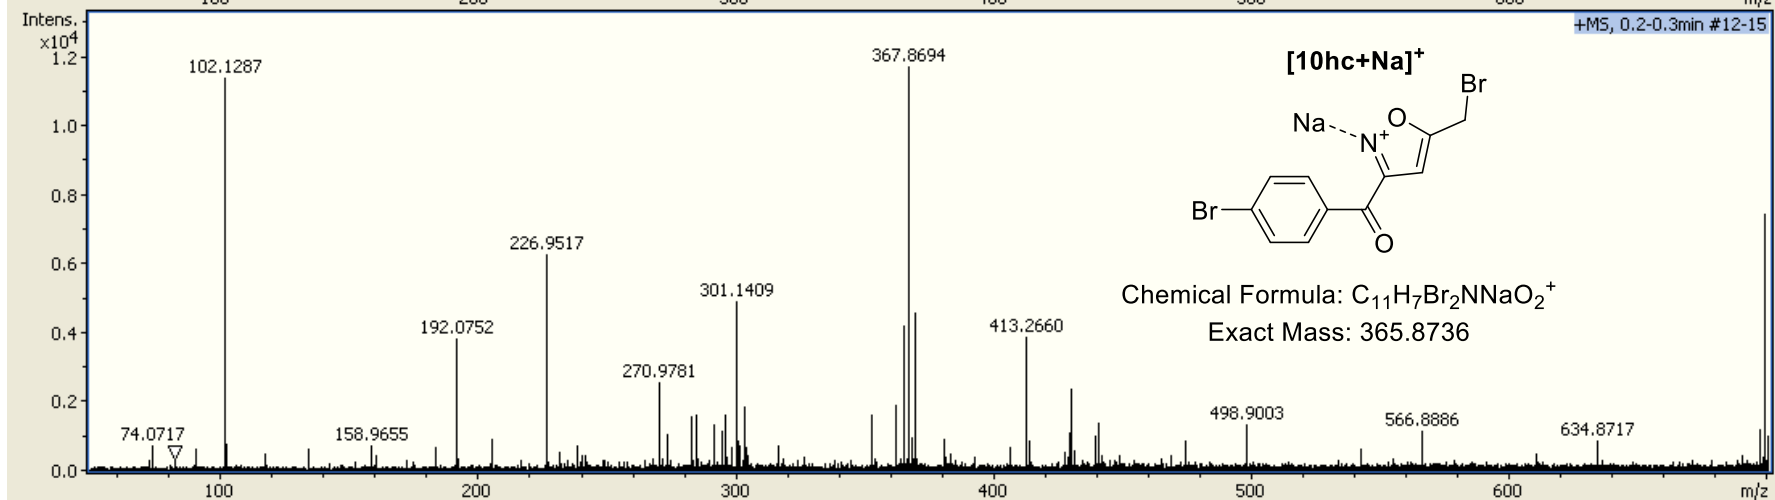

# HRMS spectral charts for 4,7-diphenyl-[1,2,5]oxadiazolo[3,4-d]pyridazine 1-oxide (13a):

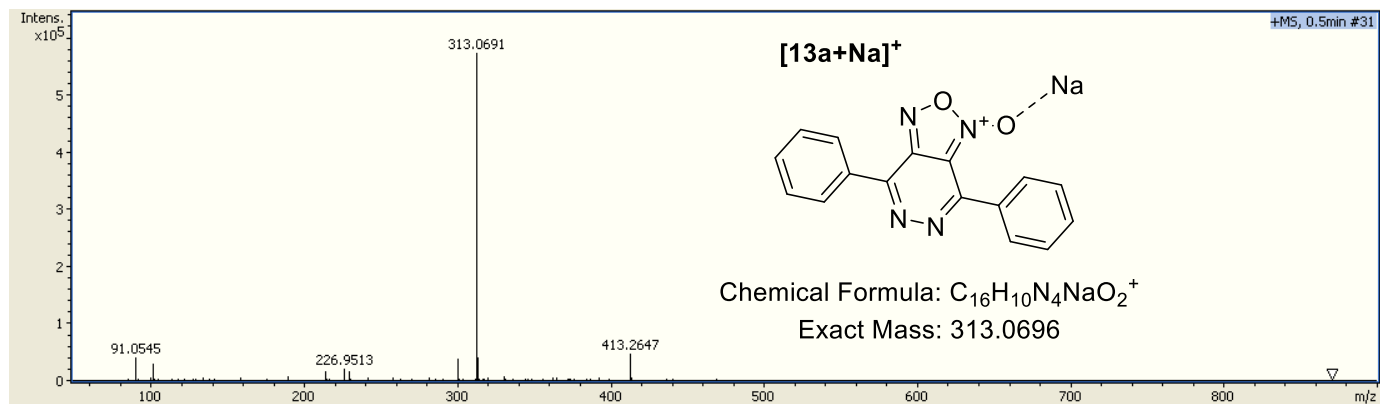

# HRMS spectral charts for cycloadducts with chalcones 12aa, 14aa, 15fb:

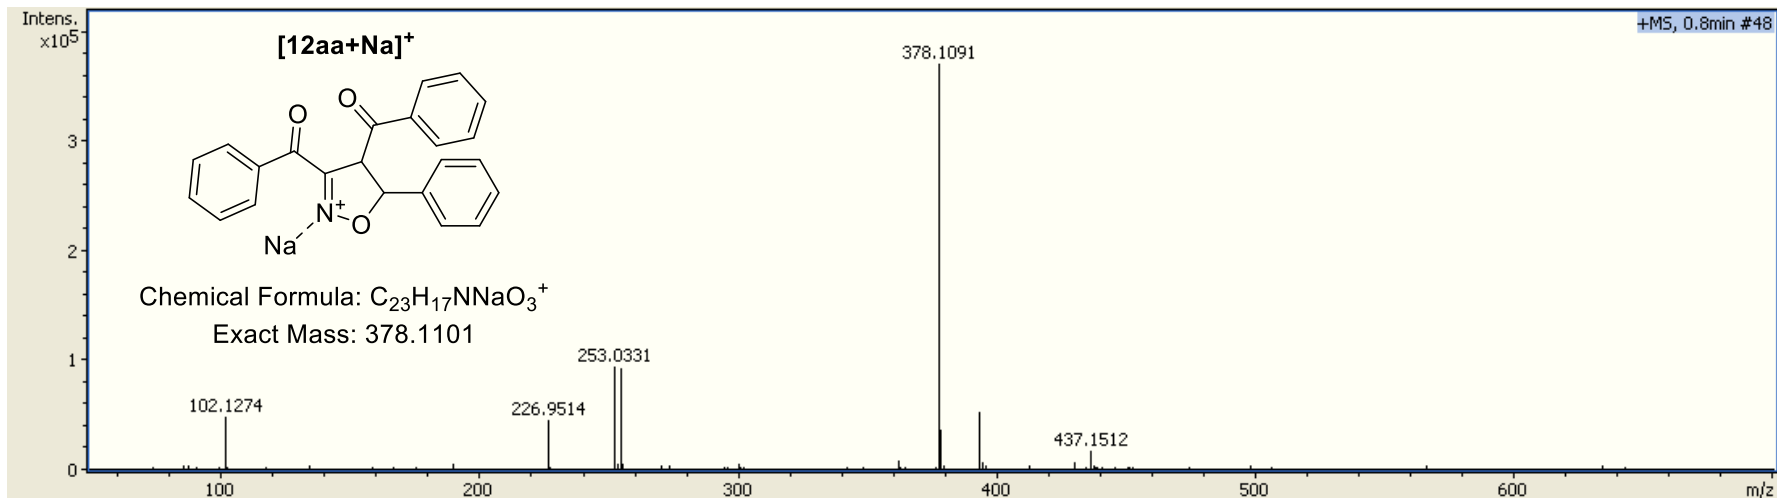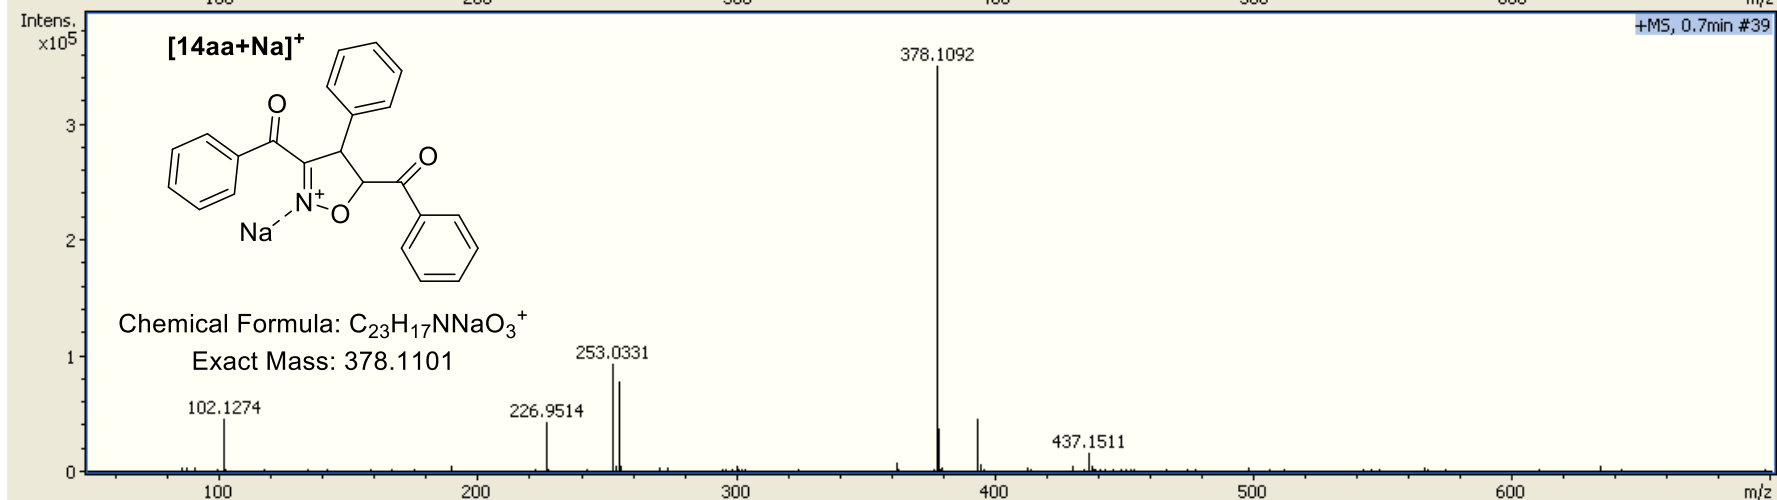



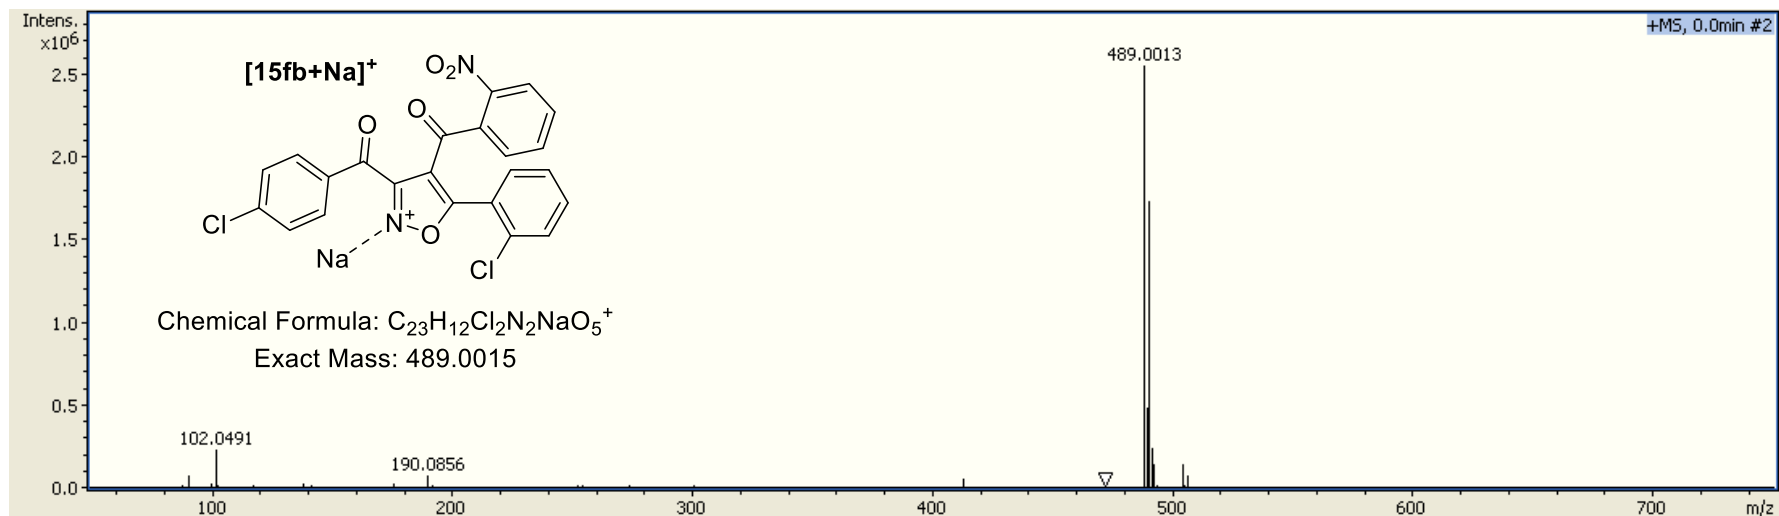

**HRMS spectral charts for 3-benzoyl-5-phenyl-3a,6a-dihydro-4H-pyrrolo[3,4-d]isoxazole-4,6(5H)-dione (17a):**

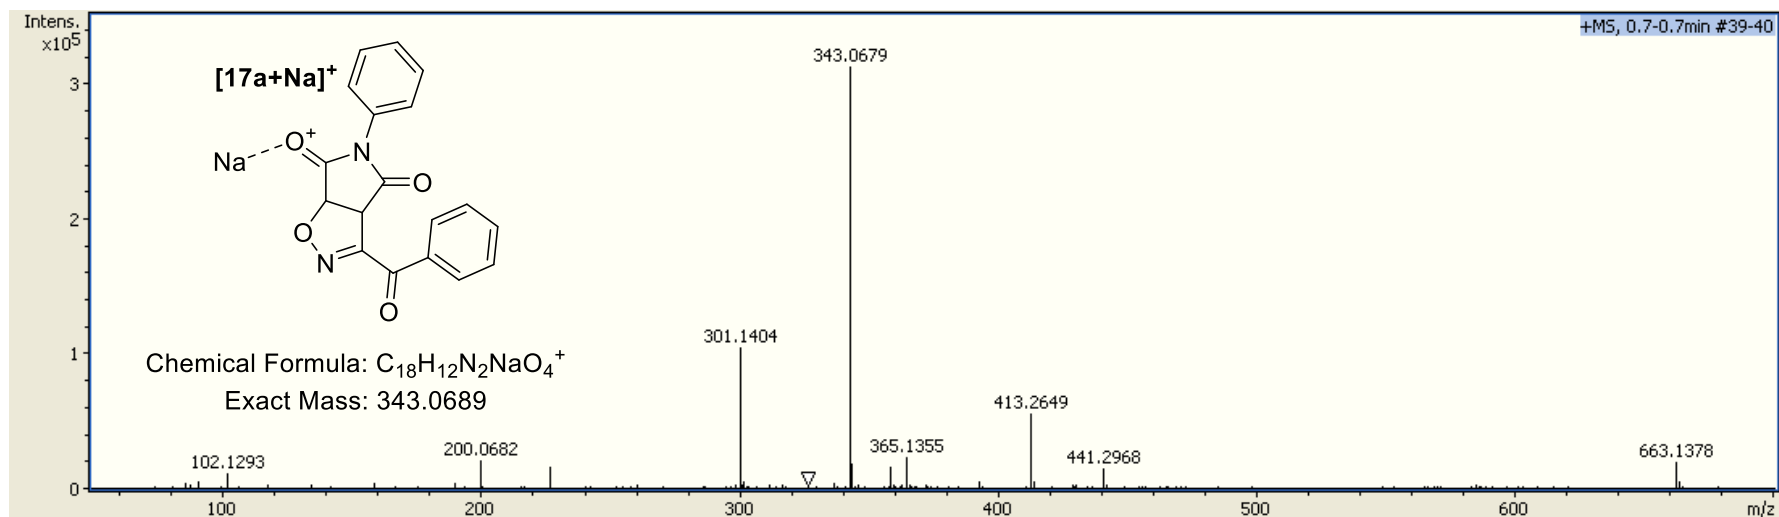

## X-Ray crystallography data

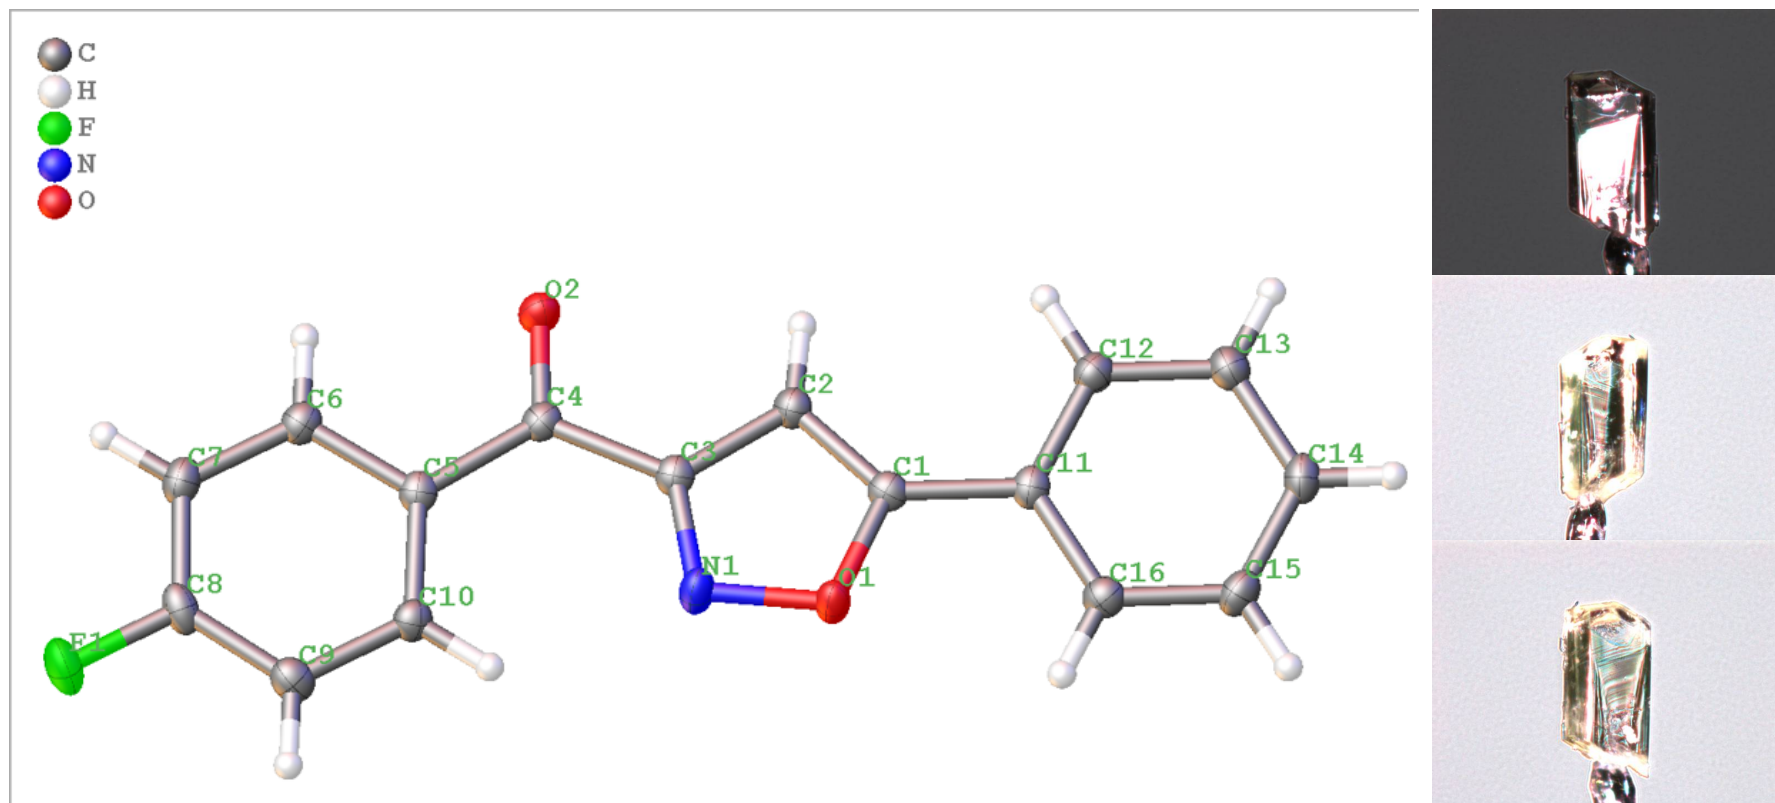

**Figure S1.** ORTEP drawing of the crystal structure (left) and microphotography of the single crystal of compound **10da** used for X-Ray diffraction analysis (right)

**Table S1 Crystal data and structure refinement for 10da.**

|                                             |                                                               |
|---------------------------------------------|---------------------------------------------------------------|
| Identification code                         | ANNA_KUR182_3                                                 |
| Empirical formula                           | C <sub>16</sub> H <sub>10</sub> FNO <sub>2</sub>              |
| Formula weight                              | 267.25                                                        |
| Temperature/K                               | 100.00(10)                                                    |
| Crystal system                              | monoclinic                                                    |
| Space group                                 | P2 <sub>1</sub> /n                                            |
| a/Å                                         | 5.77617(12)                                                   |
| b/Å                                         | 28.7775(6)                                                    |
| c/Å                                         | 7.41435(13)                                                   |
| α/°                                         | 90                                                            |
| β/°                                         | 95.1230(19)                                                   |
| γ/°                                         | 90                                                            |
| Volume/Å <sup>3</sup>                       | 1227.52(4)                                                    |
| Z                                           | 4                                                             |
| ρ <sub>calc</sub> /cm <sup>3</sup>          | 1.446                                                         |
| μ/mm <sup>-1</sup>                          | 0.888                                                         |
| F(000)                                      | 552.0                                                         |
| Crystal size/mm <sup>3</sup>                | 0.576 × 0.289 × 0.124                                         |
| Radiation                                   | Cu Kα (λ = 1.54184)                                           |
| 2θ range for data collection/°              | 12.302 to 152.478                                             |
| Index ranges                                | -7 ≤ h ≤ 7, -35 ≤ k ≤ 36, -6 ≤ l ≤ 9                          |
| Reflections collected                       | 12715                                                         |
| Independent reflections                     | 2566 [R <sub>int</sub> = 0.0452, R <sub>sigma</sub> = 0.0238] |
| Data/restraints/parameters                  | 2566/0/169                                                    |
| Goodness-of-fit on F <sup>2</sup>           | 1.072                                                         |
| Final R indexes [I >= 2σ (I)]               | R <sub>1</sub> = 0.0513, wR <sub>2</sub> = 0.1360             |
| Final R indexes [all data]                  | R <sub>1</sub> = 0.0533, wR <sub>2</sub> = 0.1374             |
| Largest diff. peak/hole / e Å <sup>-3</sup> | 0.38/-0.31                                                    |

**Table S2 Fractional Atomic Coordinates ( $\times 10^4$ ) and Equivalent Isotropic Displacement Parameters ( $\text{\AA}^2 \times 10^3$ ) for 10da.  $U_{eq}$  is defined as 1/3 of of the trace of the orthogonalised  $U_{IJ}$  tensor.**

| Atom | <i>x</i>    | <i>y</i>  | <i>z</i>   | $U(eq)$ |
|------|-------------|-----------|------------|---------|
| F1   | 14576.8(19) | 3189.4(4) | 5379.5(14) | 28.6(3) |
| O2   | 7051(2)     | 4471.0(4) | 1342.2(16) | 23.0(3) |
| O1   | 11058(2)    | 5764.8(4) | 2646.6(16) | 20.9(3) |
| N1   | 11294(3)    | 5288.9(5) | 2987.6(19) | 21.6(3) |
| C4   | 8893(3)     | 4587.8(5) | 2164(2)    | 16.6(3) |
| C8   | 13225(3)    | 3535.0(6) | 4622(2)    | 20.4(3) |
| C2   | 7877(3)     | 5435.5(5) | 1330(2)    | 17.2(3) |
| C3   | 9396(3)     | 5099.7(5) | 2194.9(19) | 16.3(3) |
| C11  | 8482.1(17)  | 6329.0(2) | 1154.6(13) | 16.7(3) |
| C16  | 10154.3(14) | 6672.9(3) | 1492.5(13) | 19.6(3) |
| C15  | 9661.5(16)  | 7128.7(3) | 969.8(14)  | 21.5(3) |
| C14  | 7496.6(18)  | 7240.6(2) | 109.1(14)  | 21.4(4) |
| C13  | 5824.4(14)  | 6896.6(3) | -228.9(14) | 21.6(3) |
| C12  | 6317.1(15)  | 6440.8(3) | 293.9(14)  | 19.3(3) |
| C10  | 12707(3)    | 4333.1(5) | 3866(2)    | 18.1(3) |
| C1   | 8998(3)     | 5844.0(5) | 1653.6(19) | 16.3(3) |
| C9   | 14093(3)    | 3979.6(6) | 4662(2)    | 20.7(3) |
| C7   | 11029(3)    | 3420.7(5) | 3839(2)    | 20.3(3) |
| C5   | 10482(3)    | 4234.2(5) | 3061.8(19) | 16.3(3) |
| C6   | 9665(3)     | 3774.4(5) | 3054(2)    | 18.8(3) |

**Table S3 Anisotropic Displacement Parameters ( $\text{\AA}^2 \times 10^3$ ) for 10da. The Anisotropic displacement factor exponent takes the form:  $-2\pi^2[h^2a^{*2}U_{11}+2hka^*b^*U_{12}+\dots]$ .**

| Atom | $U_{11}$ | $U_{22}$ | $U_{33}$ | $U_{23}$ | $U_{13}$ | $U_{12}$ |
|------|----------|----------|----------|----------|----------|----------|
| F1   | 34.3(6)  | 21.2(5)  | 28.7(5)  | 1.4(4)   | -5.6(4)  | 9.6(4)   |
| O2   | 21.2(6)  | 19.4(6)  | 27.3(6)  | 1.4(4)   | -4.4(5)  | -2.7(4)  |
| O1   | 22.7(6)  | 14.2(5)  | 24.0(6)  | 1.2(4)   | -7.1(5)  | -1.2(4)  |
| N1   | 26.2(7)  | 13.7(6)  | 23.8(7)  | 0.7(5)   | -4.2(5)  | -1.4(5)  |
| C4   | 18.7(7)  | 17.7(7)  | 13.7(7)  | -0.5(5)  | 2.8(5)   | -1.5(6)  |
| C8   | 28.1(9)  | 19.0(8)  | 14.0(7)  | 0.2(6)   | 0.8(6)   | 8.0(6)   |
| C2   | 19.7(7)  | 17.2(7)  | 14.7(7)  | 0.3(5)   | 1.2(5)   | -0.1(6)  |
| C3   | 19.7(7)  | 17.8(7)  | 11.4(7)  | -0.8(5)  | 2.1(5)   | 0.0(6)   |
| C11  | 21.9(8)  | 16.2(7)  | 12.3(7)  | -0.4(5)  | 3.0(6)   | 0.1(6)   |
| C16  | 20.5(8)  | 21.1(8)  | 16.8(7)  | 0.1(6)   | 0.3(6)   | -1.1(6)  |
| C15  | 26.8(8)  | 17.6(7)  | 20.2(8)  | -1.3(6)  | 1.9(6)   | -4.6(6)  |
| C14  | 29.3(9)  | 15.6(7)  | 19.7(8)  | 0.8(6)   | 3.5(6)   | 2.2(6)   |
| C13  | 21.9(8)  | 20.8(8)  | 22.1(8)  | 0.9(6)   | 1.6(6)   | 2.6(6)   |
| C12  | 20.5(8)  | 17.8(7)  | 19.7(7)  | -1.3(6)  | 2.3(6)   | -1.7(6)  |
| C10  | 20.9(8)  | 17.1(7)  | 16.4(7)  | -2.0(5)  | 1.1(6)   | -0.5(6)  |
| C1   | 18.1(7)  | 19.2(8)  | 11.5(6)  | -0.5(5)  | 1.1(5)   | 0.4(6)   |
| C9   | 21.7(8)  | 22.8(8)  | 17.3(7)  | -2.7(6)  | -0.8(6)  | 2.5(6)   |
| C7   | 27.5(8)  | 16.0(7)  | 17.8(7)  | -0.2(6)  | 3.7(6)   | -0.7(6)  |
| C5   | 20.7(8)  | 17.1(7)  | 11.3(6)  | -0.8(5)  | 2.6(5)   | 0.3(6)   |
| C6   | 21.9(8)  | 18.5(8)  | 16.3(7)  | -1.4(6)  | 2.2(6)   | -1.4(6)  |

**Table S4 Bond Lengths for 10da.**

| Atom | Atom | Length/Å   | Atom | Atom | Length/Å   |
|------|------|------------|------|------|------------|
| F1   | C8   | 1.3548(18) | C11  | C16  | 1.3900     |
| O2   | C4   | 1.225(2)   | C11  | C12  | 1.3900     |
| O1   | N1   | 1.3970(17) | C11  | C1   | 1.4674(17) |
| O1   | C1   | 1.3615(19) | C16  | C15  | 1.3900     |
| N1   | C3   | 1.315(2)   | C15  | C14  | 1.3900     |
| C4   | C3   | 1.501(2)   | C14  | C13  | 1.3900     |
| C4   | C5   | 1.487(2)   | C13  | C12  | 1.3900     |
| C8   | C9   | 1.374(2)   | C10  | C9   | 1.393(2)   |
| C8   | C7   | 1.387(2)   | C10  | C5   | 1.397(2)   |
| C2   | C3   | 1.419(2)   | C7   | C6   | 1.383(2)   |
| C2   | C1   | 1.353(2)   | C5   | C6   | 1.405(2)   |

**Table S5 Bond Angles for 10da.**

| Atom | Atom | Atom | Angle/°    | Atom | Atom | Atom | Angle/°    |
|------|------|------|------------|------|------|------|------------|
| C1   | O1   | N1   | 109.17(12) | C11  | C16  | C15  | 120.0      |
| C3   | N1   | O1   | 105.15(12) | C14  | C15  | C16  | 120.0      |
| O2   | C4   | C3   | 115.81(14) | C15  | C14  | C13  | 120.0      |
| O2   | C4   | C5   | 120.59(14) | C14  | C13  | C12  | 120.0      |
| C5   | C4   | C3   | 123.60(14) | C13  | C12  | C11  | 120.0      |
| F1   | C8   | C9   | 118.64(15) | C9   | C10  | C5   | 120.29(15) |
| F1   | C8   | C7   | 118.11(15) | O1   | C1   | C11  | 116.33(12) |
| C9   | C8   | C7   | 123.25(15) | C2   | C1   | O1   | 109.37(13) |
| C1   | C2   | C3   | 104.16(14) | C2   | C1   | C11  | 134.30(14) |
| N1   | C3   | C4   | 124.47(14) | C8   | C9   | C10  | 118.45(16) |
| N1   | C3   | C2   | 112.15(14) | C6   | C7   | C8   | 117.85(15) |
| C2   | C3   | C4   | 123.37(14) | C10  | C5   | C4   | 124.01(14) |
| C16  | C11  | C12  | 120.0      | C10  | C5   | C6   | 119.33(14) |
| C16  | C11  | C1   | 120.64(9)  | C6   | C5   | C4   | 116.65(14) |
| C12  | C11  | C1   | 119.34(9)  | C7   | C6   | C5   | 120.84(15) |

**Table S6 Torsion Angles for 10da.**

| A   | B   | C   | D   | Angle/°     | A      | B   | C   | D   | Angle/°     |
|-----|-----|-----|-----|-------------|--------|-----|-----|-----|-------------|
| F1  | C8  | C9  | C10 | 179.37(13)  | C16C15 | C14 | C13 |     | 0.0         |
| F1  | C8  | C7  | C6  | -179.43(13) | C15C14 | C13 | C12 |     | 0.0         |
| O2  | C4  | C3  | N1  | -179.10(15) | C14C13 | C12 | C11 |     | 0.0         |
| O2  | C4  | C3  | C2  | -0.4(2)     | C12C11 | C16 | C15 |     | 0.0         |
| O2  | C4  | C5  | C10 | 173.32(14)  | C12C11 | C1  | O1  |     | -173.83(9)  |
| O2  | C4  | C5  | C6  | -5.6(2)     | C12C11 | C1  | C2  |     | 7.2(2)      |
| O1  | N1  | C3  | C4  | 178.64(13)  | C10C5  | C6  | C7  |     | 0.4(2)      |
| O1  | N1  | C3  | C2  | -0.19(17)   | C1     | O1  | N1  | C3  | 0.17(16)    |
| N1  | O1  | C1  | C2  | -0.09(17)   | C1     | C2  | C3  | N1  | 0.14(18)    |
| N1  | O1  | C1  | C11 | -179.31(11) | C1     | C2  | C3  | C4  | -178.71(13) |
| C4  | C5  | C6  | C7  | 179.33(13)  | C1     | C11 | C16 | C15 | 178.32(11)  |
| C8  | C7  | C6  | C5  | -0.3(2)     | C1     | C11 | C12 | C13 | -178.34(10) |
| C3  | C4  | C5  | C10 | -6.9(2)     | C9     | C8  | C7  | C6  | 0.4(2)      |
| C3  | C4  | C5  | C6  | 174.22(13)  | C9     | C10 | C5  | C4  | -179.30(14) |
| C3  | C2  | C1  | O1  | -0.02(17)   | C9     | C10 | C5  | C6  | -0.4(2)     |
| C3  | C2  | C1  | C11 | 179.00(15)  | C7     | C8  | C9  | C10 | -0.4(2)     |
| C11 | C16 | C15 | C14 | 0.0         | C5     | C4  | C3  | N1  | 1.1(2)      |
| C16 | C11 | C12 | C13 | 0.0         | C5     | C4  | C3  | C2  | 179.77(14)  |
| C16 | C11 | C1  | O1  | 7.84(16)    | C5     | C10 | C9  | C8  | 0.4(2)      |
| C16 | C11 | C1  | C2  | -171.14(15) |        |     |     |     |             |

**Table S7 Hydrogen Atom Coordinates ( $\text{\AA}\times 10^4$ ) and Isotropic Displacement Parameters ( $\text{\AA}^2\times 10^3$ ) for 10da.**

| Atom | x        | y       | z       | U(eq) |
|------|----------|---------|---------|-------|
| H2   | 6440.04  | 5386.07 | 688.25  | 21    |
| H16  | 11602.73 | 6598.05 | 2068.4  | 23    |
| H15  | 10780.28 | 7358.82 | 1195.86 | 26    |
| H14  | 7166.9   | 7545.53 | -240.69 | 26    |
| H13  | 4375.94  | 6971.48 | -804.73 | 26    |
| H12  | 5198.35  | 6210.71 | 67.8    | 23    |
| H10  | 13264.84 | 4636.27 | 3870.07 | 22    |
| H9   | 15572.31 | 4043.14 | 5206.83 | 25    |
| H7   | 10490.01 | 3116.2  | 3841.4  | 24    |
| H6   | 8187.86  | 3706.87 | 2513.62 | 23    |

### Experimental

Single crystals of  $\text{C}_{16}\text{H}_{10}\text{FNO}_2$  **10da** were prepared by cycloaddition reaction in PPA. A suitable crystal was selected and mounted on the glass stick by acrylic glue on a SuperNova, Dual, Cu at home/near, AtlasS2 diffractometer. The crystal was kept at 100.00(10) K during data collection. Using Olex2<sup>1</sup>, the structure was solved with the SHELXD<sup>2</sup> structure solution program using Dual Space and refined with the SHELXL<sup>3</sup> refinement package using Least Squares minimisation.

### Crystal structure determination of [10da]

**Crystal Data** for  $\text{C}_{16}\text{H}_{10}\text{FNO}_2$  ( $M=267.25$  g/mol): monoclinic, space group  $\text{P}2_1/\text{n}$  (no. 14),  $a = 5.77617(12)$   $\text{\AA}$ ,  $b = 28.7775(6)$   $\text{\AA}$ ,  $c = 7.41435(13)$   $\text{\AA}$ ,  $\beta = 95.1230(19)^\circ$ ,  $V = 1227.52(4)$   $\text{\AA}^3$ ,  $Z = 4$ ,  $T = 100.00(10)$  K,  $\mu(\text{Cu K}\alpha) = 0.888$   $\text{mm}^{-1}$ ,  $D_{\text{calc}} = 1.446$   $\text{g/cm}^3$ , 12715 reflections measured ( $12.302^\circ \leq 2\Theta \leq 152.478^\circ$ ), 2566 unique ( $R_{\text{int}} = 0.0452$ ,  $R_{\text{sigma}} = 0.0238$ ) which were used in all calculations. The final  $R_1$  was 0.0513 ( $I > 2\sigma(I)$ ) and  $wR_2$  was 0.1374 (all data).

### Refinement model description

Number of restraints - 0, number of constraints - unknown.

Details:

1. Fixed Uiso

At 1.2 times of:

All C(H) groups

2.a Aromatic/amide H refined with riding coordinates:

C2(H2), C16(H16), C15(H15), C14(H14), C13(H13), C12(H12), C10(H10), C9(H9),

C7(H7), C6(H6)

2.b Fitted hexagon refined as free rotating group:

C11(C16,C15,C14,C13,C12)

This report has been created with Olex2, compiled on 2020.11.12 svn.r5f609507 for OlexSys. Please [let us know](#) if there are any errors or if you would like to have additional features.



## References

1. Dolomanov, O.V., Bourhis, L.J., Gildea, R.J, Howard, J.A.K. & Puschmann, H. (2009), *J. Appl. Cryst.* 42, 339-341.
2. Sheldrick, G.M. (2008). *Acta Cryst.* A64, 112-122.
3. Sheldrick, G.M. (2015). *Acta Cryst.* C71, 3-8.
